# Supplementary material for: Highly diastereoselective synthesis of quaternary α-trifluoromethyl α-amino acids from chiral imines of trifluoropyruvate
Source: Royal Society of Chemistry journal article supplement (doi:10.1039/c0cc02408b), 2010-01-01

*Supporting Information for*

# **Highly diastereoselective synthesis of quaternary $\alpha$ -trifluoromethyl $\alpha$ -amino acids from chiral imines of trifluoropyruvate**

**Qiao-Qiao Min,<sup>b</sup> Chun-Yang He,<sup>a</sup> Haibing Zhou,<sup>b</sup> and Xingang Zhang<sup>\*a</sup>**

*<sup>a</sup>Key Laboratory of Organofluorine Chemistry, Shanghai Institute of Organic Chemistry, Chinese Academy of Sciences, 345 Lingling Road, Shanghai 200032, China, and <sup>b</sup>State Key Laboratory of Virology, College of Pharmacy, Wuhan University, Wuhan, 430071, China*  
[xgzhang@mail.sioc.ac.cn](mailto:xgzhang@mail.sioc.ac.cn)

## List of Contents

|                                                                                                           |     |
|-----------------------------------------------------------------------------------------------------------|-----|
| 1) Preparation of chiral imino ester <b>1a</b>                                                            | S03 |
| 2) Preparation of chiral imino ester <b>1b</b>                                                            | S04 |
| 3) Preparation of imino esters <b>1c-e</b>                                                                | S04 |
| 4) Preparation of compounds <b>3</b>                                                                      | S06 |
| 5) Preparation of (3 <i>R</i> , 5 <i>R</i> )- <b>4b</b>                                                   | S12 |
| 6) Preparation of compound <b>4j</b>                                                                      | S13 |
| 7) Preparation of compound <b>5</b>                                                                       | S15 |
| 8) Preparation of compound <b>6</b>                                                                       | S15 |
| 9) Preparation of compound <b>7</b>                                                                       | S16 |
| 10) Proposed transition state for Brigaud's method                                                        | S17 |
| 11) Copies of <sup>1</sup> H NMR, <sup>19</sup> F NMR and <sup>13</sup> C NMR spectra of <b>1 and 3-7</b> | S18 |

**General information:** Chemical shifts ( $\delta$ ) are reported in ppm, and coupling constants ( $J$ ) are in Hertz (Hz). For  $^{19}\text{F}$  NMR,  $\text{CFCl}_3$  was used as outside standard and low field is positive. The following abbreviations were used to explain the multiplicities: s = singlet, d = doublet, t = triplet, q = quartet, m = multiplet, br = broad. NMR yield was determined by  $^{19}\text{F}$  NMR using benzotrifluoride as an internal standard before working up the reaction.

**Materials:** All reagents were used as received from commercial sources, unless specified otherwise, or prepared as described in the literature. All reagents were weighed and handled in air, and refilled with an inert atmosphere of  $\text{N}_2$  at room temperature. THF was distilled from sodium and benzophenone immediately before use.

#### Preparation of Chiral Imino Ester 1a.

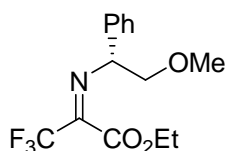

**(R)-Ethyl 3,3,3-trifluoro-2-(2-methoxy-1-phenylethylimino)propanoate (1a).** To a stirred solution of ethyl trifluoropyruvate (2.806 g, 16.5 mmol, 1.1 equiv) in toluene (150 mL) was slowly added the (*R*)-2-methoxy-1-phenylethanamine (2.268 g, 15 mmol, 1.0 equiv) at room temperature, followed by pyridinium *p*-toluenesulfonate (378 mg, 1.5 mmol, 0.1 equiv). After stirring for 2.0 h at room temperature, the reaction mixture was heated to reflux with a Dean-Stark apparatus for 20 h. Then the reaction mixture was cooled to 0 °C with an ice-bath, and toluene was evaporated. The residue was isolated with silica gel by flash chromatography (Petroleum ether /Ethyl Acetate = 80:1) to give **1a** (4.0 g, 88% yield) as a yellow oil.  $^1\text{H}$  NMR (300 MHz,  $\text{CDCl}_3$ )  $\delta$  7.37-7.22 (m, 5H), 5.20 (dd,  $J = 8.7$  Hz, 4.5 Hz, 1H), 4.28 (q,  $J = 7.2$  Hz, 2H), 3.57-3.48 (m, 2H), 3.23 (s, 3H), 1.27 (t,  $J = 7.2$  Hz, 3H).  $^{13}\text{C}$  NMR (100 MHz,  $\text{CDCl}_3$ )  $\delta$  158.4, 149.3 (q,  $J = 36.4$  Hz), 138.2, 128.7, 128.0, 127.2, 118.3 (q,  $J = 276.8$  Hz), 76.7, 66.5, 62.4, 59.0, 13.9.  $^{19}\text{F}$  NMR (282 MHz,  $\text{CDCl}_3$ )  $\delta$  -70.5 (s, 3F). IR (thin film):  $\nu_{\text{max}}$  3034, 1743, 1682  $\text{cm}^{-1}$ . MS (EI):  $m/z$  (%) 258 ( $\text{M}^+ - \text{C}_2\text{H}_5\text{O}$ , 100), 135, 91. HRMS: Calculated for  $\text{C}_{14}\text{H}_{16}\text{NO}_3\text{F}_3$  ( $\text{M}^+$ ): 303.1082; Found: 303.1077.

## Preparation of Chiral Imino Ester **1b**.

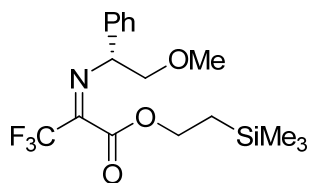

### **(R)-2-(Trimethylsilyl)ethyl 3,3,3-trifluoro-2-(2-methoxy-1-phenylethylimino)propanoate(1b).**

According to Uneyama's procedure,<sup>1</sup> imino ester **1b** (2.62 g) was prepared from TFA (1.43 g, 12.5 mmol) in 56% overall yield (3 steps) as a yellow oil. The product was purified with silica gel chromatography (Petroleum ether /Ethyl Acetate = 80:1). <sup>1</sup>H NMR (300 MHz, CDCl<sub>3</sub>) δ 7.33-7.20 (m, 5H), 5.19 (dd, *J* = 8.1 Hz, 4.5 Hz, 1H), 4.30 (m, 2H), 3.55-3.48 (m, 2H), 3.22 (s, 3H), 1.03-0.97 (m, 2H), -0.02 (s, 9H). <sup>13</sup>C NMR (100 MHz, CDCl<sub>3</sub>) δ 158.6, 149.5 (q, *J* = 35.6 Hz), 138.2, 128.6, 128.0, 127.3, 118.3 (q, *J* = 276.8 Hz), 76.7, 66.5, 65.1, 59.0, 17.3, -1.7. <sup>19</sup>F NMR (282 MHz, CDCl<sub>3</sub>) δ -70.2 (s, 3F). IR (thin film):  $\nu_{\max}$  3035, 1740, 1683, 1604 cm<sup>-1</sup>. MS (ESI): *m/z* (%) 398 (M<sup>+</sup> + Na<sup>+</sup>), 376 (M<sup>+</sup> + H<sup>+</sup>), 348. HRMS: Calculated for C<sub>17</sub>H<sub>24</sub>F<sub>3</sub>NO<sub>3</sub>SiNa (M<sup>+</sup>+Na<sup>+</sup>): 398.13698; Found: 398.13732.

### General procedure for the preparation of imino esters **1c-e**.

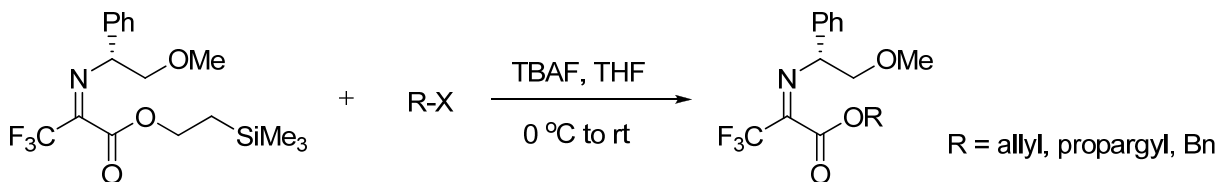

The preparation of imino esters **1c-e** was according to literature.<sup>2</sup> To a stirred solution of silylated imino ester **1b** (1 mmol) in THF (10 mL) were added corresponding electrophile R-X (2 mmol), followed by dropwise TBAF (1 M in THF, 1.1 mL, 1.1 mmol) at 0 °C. The reaction mixture was then warmed to room temperature and stirred until the starting material was consumed. The solvents were removed under reduced pressure and the residue was purified by flash column chromatography.

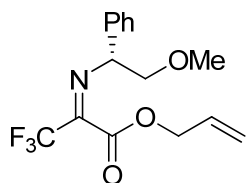

**(R)-Allyl 3,3,3-trifluoro-2-(2-methoxy-1-phenylethylimino)propanoate(1c).** Imino ester **1c** (220 mg, 70% yield) was prepared as above described from **1b** (375 mg) as a yellow oil. The product was purified with silica gel chromatography (Petroleum ether /Ethyl Acetate = 50:1).  $^1\text{H}$  NMR (300 MHz,  $\text{CDCl}_3$ )  $\delta$  7.43-7.24 (m, 5H), 5.99-5.88 (m, 1H), 5.44-5.28 (m, 3H), 4.79 (d,  $J = 5.4$  Hz, 2H), 3.67-3.56 (m, 2H), 3.31 (s, 3H).  $^{13}\text{C}$  NMR (100 MHz,  $\text{CDCl}_3$ )  $\delta$  158.0, 148.9 (q,  $J = 36.4$  Hz), 138.1, 130.4, 128.7, 128.1, 127.3, 119.7, 118.2 (q,  $J = 276.8$  Hz), 76.6, 66.6, 59.0.  $^{19}\text{F}$  NMR (282 MHz,  $\text{CDCl}_3$ )  $\delta$  -70.2 (s, 3F). IR (thin film):  $\nu_{\text{max}}$  3090, 1745, 1683, 1604  $\text{cm}^{-1}$ . MS (ESI):  $m/z$  (%) 316 ( $\text{M}^+ + \text{H}^+$ ). HRMS: Calculated for  $\text{C}_{15}\text{H}_{16}\text{NO}_3\text{F}_3\text{Na}$  ( $\text{M}^+ + \text{Na}^+$ ): 338.09745; Found: 338.09810.

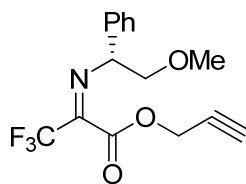

**(R)-prop-2-ynyl 3,3,3-trifluoro-2-(2-methoxy-1-phenylethylimino)propanoate(1d).** Imino ester **1d** (330 mg, 52% yield) was prepared as above described from **1b** (750 mg) as a yellow oil. The product was purified with silica gel chromatography (Petroleum ether /Ethyl Acetate = 50:1).  $^1\text{H}$  NMR (300 MHz,  $\text{CDCl}_3$ )  $\delta$  7.46-7.33 (m, 5H), 5.33 (dd,  $J = 9.3$  Hz, 4.2 Hz, 1H), 4.90 (d,  $J = 2.4$  Hz, 2H), 3.69-3.55 (m, 2H), 3.34 (s, 3H), 2.60 (t,  $J = 2.4$  Hz, 1H).  $^{13}\text{C}$  NMR (100 MHz,  $\text{CDCl}_3$ )  $\delta$  157.5, 148.2 (q,  $J = 36.4$  Hz), 137.9, 128.7, 128.1, 127.3, 118.1 (q,  $J = 268.0$  Hz), 76.5, 76.3, 75.9, 66.6, 59.0, 53.3.  $^{19}\text{F}$  NMR (282 MHz,  $\text{CDCl}_3$ )  $\delta$  -69.9 (s, 3F). IR (thin film):  $\nu_{\text{max}}$  2964, 1749, 1261  $\text{cm}^{-1}$ . MS (ESI):  $m/z$  (%) 314 ( $\text{M}^+ + \text{H}^+$ ). HRMS: Calculated for  $\text{C}_{15}\text{H}_{14}\text{NO}_3\text{F}_3$  ( $\text{M}^+$ ): 313.0926; Found: 313.0923.

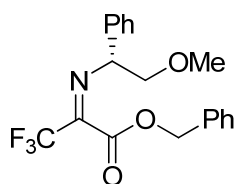

**(R)-benzyl 3,3,3-trifluoro-2-(2-methoxy-1-phenylethylimino)propanoate (1e).** Imino ester **1e** (245 mg, 67% yield) was prepared as above described from **1b** (375 mg) as a yellow oil. The

product was purified with silica gel chromatography (Petroleum ether /Ethyl Acetate = 50:1).  $^1\text{H}$  NMR (300 MHz,  $\text{CDCl}_3$ )  $\delta$  7.37-7.28 (m, 10H), 5.32 (d,  $J = 5.1$  Hz, 2H), 5.25 (m, 1H), 3.56 (m, 2H), 3.22 (s, 3H).  $^{13}\text{C}$  NMR (100 MHz,  $\text{CDCl}_3$ )  $\delta$  158.2, 148.9 (q,  $J = 35.6$  Hz), 138.0, 134.2, 128.8, 128.6, 128.5, 128.4, 128.0, 127.2, 118.2 (q,  $J = 276.9$  Hz), 76.5, 67.9, 66.5, 58.8.  $^{19}\text{F}$  NMR (282 MHz,  $\text{CDCl}_3$ )  $\delta$  -70.1 (s, 3F). IR (thin film):  $\nu_{\text{max}}$  3068, 1745, 1682, 1604  $\text{cm}^{-1}$ . MS (ESI):  $m/z$  (%) 366 ( $\text{M}^+ + \text{H}^+$ ). HRMS: Calculated for  $\text{C}_{19}\text{H}_{18}\text{NO}_3\text{F}_3\text{Na}$  ( $\text{M}^+ + \text{Na}^+$ ): 388.11310; Found: 388.11420.

### General procedure for the preparation of $\alpha$ -allyl $\alpha$ -Tfm $\alpha$ -amino acids **3**.

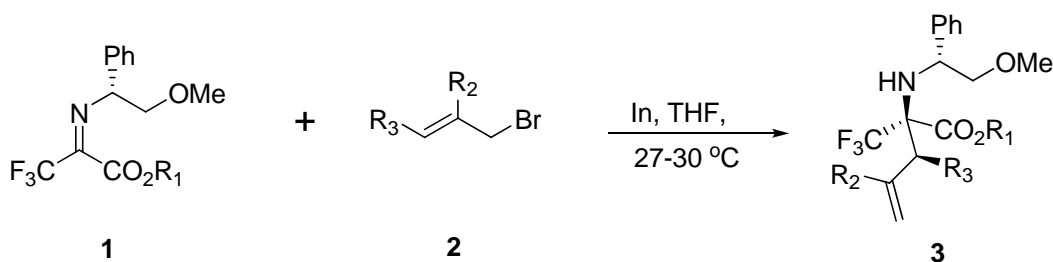

To a 10 mL of Schlenk tube were added chiral imino ester **1** (0.3 mmol) and In powder (69 mg, 0.6 mmol) under  $\text{N}_2$  at room temperature. After standing for 5 min, THF (3 mL) was added. The resulting mixture was stirred for 15 min at 27-30  $^\circ\text{C}$ , and then fresh distilled allyl bromide **2** (0.66 mmol) was added. The reaction mixture was stirred at the same temperature until the starting material was totally consumed, as confirmed by means of TLC. The reaction mixture was quenched with HCl (1 M, 2 mL) and extracted with ethyl acetate (3 x 30 mL). The combined organic layers were washed with brine (3 x 7 mL), dried over anhydrous  $\text{Na}_2\text{SO}_4$ , filtered and concentrated. The residue was purified by flash column chromatography.

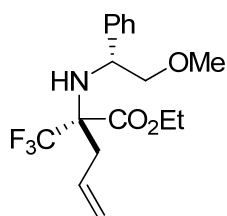

### **(R)-Ethyl 2-((R)-2-methoxy-1-phenylethylamino)-2-(trifluoromethyl)pent-4-enoate (3a).**

Compound **3a** (104 mg, 98% yield) was prepared as above described from **1a** (91 mg, 0.3 mmol) as a yellow oil. The product was purified with silica gel chromatography (Petroleum ether /Ethyl Acetate = 50:1).  $[\alpha]_{\text{D}}^{25} = -49.8$  ( $c$  1.0,  $\text{CHCl}_3$ );  $^1\text{H}$  NMR (300 MHz,  $\text{CDCl}_3$ )  $\delta$  7.39-7.22 (m, 5H),

5.80-5.71 (m, 1H), 5.11-5.06 (m, 2H), 4.18-4.07 (m, 2H), 4.05-3.95 (m, 1H), 3.38 (d,  $J = 6.6$  Hz, 2H), 3.33 (s, 3H), 2.83 (br, 1H), 2.65 (dd,  $J = 14.7$  Hz, 6.6 Hz, 1H), 2.45 (dd,  $J = 14.7$  Hz, 7.8 Hz, 1H), 1.21 (t,  $J = 7.2$  Hz, 3H).  $^{13}\text{C}$  NMR (100 MHz,  $\text{CDCl}_3$ )  $\delta$  168.0, 141.6, 131.2, 128.2, 127.5, 124.9 (q,  $J = 286.0$  Hz), 119.4, 77.5, 67.9 (q,  $J = 25.0$  Hz), 61.7, 58.6, 56.9, 36.7, 13.7.  $^{19}\text{F}$  NMR (282 MHz,  $\text{CDCl}_3$ )  $\delta$  -72.5 (s, 3F). IR (thin film):  $\nu_{\text{max}}$  3339, 3084, 1740, 1642, 1603  $\text{cm}^{-1}$ . MS (EI):  $m/z$  (%) 300 ( $\text{M}^+ - \text{C}_2\text{H}_5\text{O}$ , 100), 135, 131, 91. HRMS: Calculated for  $\text{C}_{15}\text{H}_{17}\text{NO}_2\text{F}_3$  ( $\text{M}^+ - \text{C}_2\text{H}_5\text{O}$ ): 300.1211; Found: 300.1217.

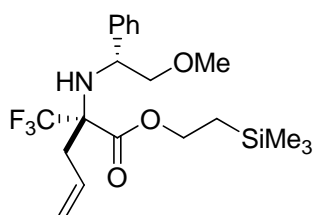

**(R)-2-(Trimethylsilyl)ethyl 2-((R)-2-methoxy-1-phenylethylamino)-2-(trifluoromethyl)pent-4-enoate (3b).** Compound **3b** (118 mg, 94% yield) was prepared as above described from **1b** (113 mg, 0.3 mmol) as a yellow oil. The product was purified with silica gel chromatography (Petroleum ether /Ethyl Acetate = 80:1).  $[\alpha]_{\text{D}}^{25} = -38.6$  ( $c$  1.9,  $\text{CHCl}_3$ );  $^1\text{H}$  NMR (300 MHz,  $\text{CDCl}_3$ )  $\delta$  7.34-7.21 (m, 5H), 5.71 (m, 1H), 5.07-5.03 (m, 2H), 4.15-3.94 (m, 3H), 3.34 (d,  $J = 6.3$  Hz, 2H), 3.30 (s, 3H), 2.80 (br, 1H), 2.61 (dd,  $J = 15.0$  Hz, 6.5 Hz, 1H), 2.41 (dd,  $J = 15.0$  Hz, 7.5 Hz, 1H), 0.91 (t,  $J = 8.1$  Hz, 2H), -0.03 (s, 9H).  $^{13}\text{C}$  NMR (75.4 MHz,  $\text{CDCl}_3$ )  $\delta$  168.2, 141.7, 131.3, 128.1, 127.3, 124.9 (q,  $J = 286.9$  Hz), 119.3, 77.6, 67.9 (q,  $J = 25.3$  Hz), 64.3, 58.7, 56.9, 36.7, 17.0, -1.7.  $^{19}\text{F}$  NMR (282 MHz,  $\text{CDCl}_3$ )  $\delta$  -72.1 (s, 3F). IR (thin film):  $\nu_{\text{max}}$  3343, 3085, 1739, 1643  $\text{cm}^{-1}$  MS (ESI):  $m/z$  (%) 418 ( $\text{M}^+ + \text{H}^+$ ). HRMS: Calculated for  $\text{C}_{20}\text{H}_{31}\text{NO}_3\text{F}_3\text{Si}$  ( $\text{M}^+ + \text{H}^+$ ): 418.20198; Found: 418.20255.

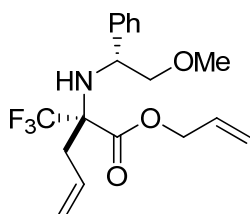

**(R)-Allyl 2-((R)-2-methoxy-1-phenylethylamino)-2-(trifluoromethyl)pent-4-enoate (3c).** Compound **3c** (104 mg, 97% yield) was prepared as above described from **1c** (95 mg, 0.3 mmol) as a yellow oil. The product was purified with silica gel chromatography (Petroleum ether /Ethyl Acetate = 80:1).  $[\alpha]_{\text{D}}^{25} = -54.7$  ( $c$  0.3,  $\text{CHCl}_3$ );  $^1\text{H}$  NMR (300 MHz,  $\text{CDCl}_3$ )  $\delta$  7.37-7.23 (m, 5H),

5.82-5.75 (m, 2H), 5.33-5.21 (m, 2H), 5.11-5.06 (m, 2H), 4.49 (dd,  $J = 13.2$  Hz, 5.3 Hz, 1H), 4.37 (dd,  $J = 13.2$  Hz, 5.4 Hz, 1H), 4.16 (t,  $J = 6.3$  Hz, 1H), 3.37 (d,  $J = 6.9$  Hz, 2H), 3.32 (s, 3H), 2.66 (br, 1H), 2.65 (dd,  $J = 14.3$  Hz, 6.2 Hz, 1H), 2.45 (dd,  $J = 14.3$  Hz, 7.4 Hz, 1H).  $^{13}\text{C}$  NMR (75.4 MHz,  $\text{CDCl}_3$ )  $\delta$  167.7, 141.6, 131.2, 128.2, 127.3, 124.8 (q,  $J = 287.7$  Hz), 119.7, 118.7, 77.4, 68.0 (q,  $J = 25.6$  Hz), 66.2, 58.6, 57.0, 36.8.  $^{19}\text{F}$  NMR (282 MHz,  $\text{CDCl}_3$ )  $\delta$  -72.1 (s, 3F). IR (thin film):  $\nu_{\text{max}}$  3340, 3086, 1744, 1644, 1604  $\text{cm}^{-1}$ . MS (ESI):  $m/z$  (%) 358 ( $\text{M}^+ + \text{H}^+$ ). HRMS: Calculated for  $\text{C}_{18}\text{H}_{22}\text{NO}_3\text{F}_3\text{Na}$  ( $\text{M}^+ + \text{Na}^+$ ): 380.14440; Found: 380.14610.

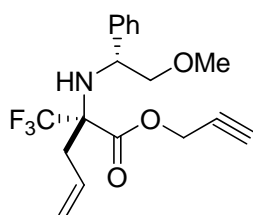

**(*R*)-Prop-2-ynyl 2-((*R*)-2-methoxy-1-phenylethylamino)-2-(trifluoromethyl)pent-4-enoate (3d).**

Compound **3d** (104 mg, 98% yield) was prepared as above described from **1d** (94 mg, 0.3 mmol) as a yellow oil. The product was purified with silica gel chromatography (Petroleum ether /Ethyl Acetate = 80:1).  $[\alpha]_{\text{D}}^{25} = -51.7$  (c 0.5,  $\text{CHCl}_3$ );  $^1\text{H}$  NMR (300 MHz,  $\text{CDCl}_3$ )  $\delta$  7.37-7.25 (m, 5H), 5.74 (m, 1H), 5.15-5.09 (m, 2H), 4.53 (dd,  $J = 15.6$  Hz, 2.1 Hz, 1H), 4.36 (dd,  $J = 15.6$  Hz, 2.7 Hz, 1H), 4.18 (t,  $J = 6.6$  Hz, 1H), 3.38 (d,  $J = 6.6$  Hz, 2H), 3.34 (s, 3H), 2.81 (br, 1H), 2.66 (dd,  $J = 14.4$  Hz, 6.6 Hz, 1H), 2.57 (br, 1H), 2.50-2.44 (m, 2H).  $^{13}\text{C}$  NMR (100 MHz,  $\text{CDCl}_3$ )  $\delta$  167.4, 141.1, 130.7, 128.2, 127.4, 124.7 (q,  $J = 288.4$  Hz), 120.0, 77.5, 75.5, 67.9 (q,  $J = 25.2$  Hz), 58.7, 56.9, 52.9, 37.0.  $^{19}\text{F}$  NMR (282 MHz,  $\text{CDCl}_3$ )  $\delta$  -72.7 (s, 3F). IR (thin film):  $\nu_{\text{max}}$  3306, 3034, 2136, 1750, 1642  $\text{cm}^{-1}$ . MS (ESI):  $m/z$  (%) 378 ( $\text{M}^+ + \text{Na}^+$ ), 356 ( $\text{M}^+ + \text{H}^+$ ). HRMS: Calculated for  $\text{C}_{18}\text{H}_{20}\text{NO}_3\text{F}_3\text{Na}$  ( $\text{M}^+ + \text{Na}^+$ ): 378.12875; Found: 378.12982.

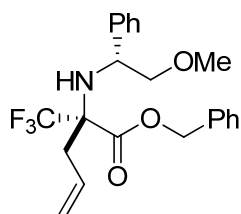

**(*R*)-Benzyl 2-((*R*)-2-methoxy-1-phenylethylamino)-2-(trifluoromethyl)pent-4-enoate (3e).**

Compound **3e** (55 mg, 45% yield) was prepared as above described from **1e** (110 mg, 0.3 mmol) as a yellow oil. The product was purified with silica gel chromatography (Petroleum ether /Ethyl Acetate = 80:1).  $[\alpha]_{\text{D}}^{25} = -50.4$  (c 2.8,  $\text{CHCl}_3$ );  $^1\text{H}$  NMR (300 MHz,  $\text{CDCl}_3$ )  $\delta$  7.39-7.21 (m, 10H),



5.70 (m, 1H), 5.07-4.99 (m, 3H), 4.91 (d,  $J = 12.9$  Hz, 1H), 4.15 (t,  $J = 6.3$  Hz, 1H), 3.34 (d,  $J = 6.6$  Hz, 2H), 3.27 (s, 3H), 2.86 (br, 1H), 2.64 (dd,  $J = 15.0$  Hz, 6.6 Hz, 1H), 2.44 (dd,  $J = 15.0$  Hz, 8.1 Hz, 1H).  $^{13}\text{C}$  NMR (75.4 MHz,  $\text{CDCl}_3$ )  $\delta$  168.0, 141.4, 134.9, 131.0, 128.5, 128.3, 128.2, 128.0, 127.3, 124.8 (q,  $J = 288.0$  Hz), 119.6, 77.4, 68.1 (q,  $J = 25.6$  Hz), 67.4, 58.6, 57.0, 36.8.  $^{19}\text{F}$  NMR (282 MHz,  $\text{CDCl}_3$ )  $\delta$  -72.0 (s, 3F). IR (thin film):  $\nu_{\text{max}}$  3340, 3036, 1743  $\text{cm}^{-1}$ . MS (ESI):  $m/z$  (%) 408 ( $\text{M}^+ + \text{H}^+$ ). HRMS: Calculated for  $\text{C}_{22}\text{H}_{24}\text{NO}_3\text{F}_3\text{Na}$  ( $\text{M}^+ + \text{Na}^+$ ): 430.16005; Found: 430.16018.

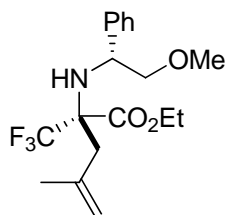

**(R)-Ethyl 2-((R)-2-methoxy-1-phenylethylamino)-4-methyl-2-(trifluoromethyl)pent-4-enoate**

**(3f).** Compound **3f** (103 mg, 96% yield) was prepared as above described from **1a** (91 mg, 0.3 mmol) as a yellow oil. The product was purified with silica gel chromatography (Petroleum ether /Ethyl Acetate = 80:1).  $[\alpha]_{\text{D}}^{25} = -36.3$  ( $c$  1.4,  $\text{CHCl}_3$ );  $^1\text{H}$  NMR (300 MHz,  $\text{CDCl}_3$ )  $\delta$  7.36-7.20 (m, 5H), 4.88 (s, 1H), 4.84 (s, 1H), 4.23 (t,  $J = 6.0$  Hz, 2H), 4.09-4.04 (m, 1H), 3.94-3.88 (m, 1H), 3.42-3.38 (m, 2H), 3.30 (s, 3H), 2.79 (br, 1H), 2.63 (d,  $J = 15.0$  Hz, 1H), 2.54 (d,  $J = 15.0$  Hz, 1H), 1.70 (s, 3H), 1.13 (t,  $J = 7.1$  Hz, 3H).  $^{13}\text{C}$  NMR (100 MHz,  $\text{CDCl}_3$ )  $\delta$  168.4, 142.2, 139.4, 128.0, 127.3, 127.1, 125.0 (q,  $J = 289.0$  Hz), 115.6, 77.6, 67.5 (q,  $J = 25.5$  Hz), 61.8, 58.8, 56.8, 39.8, 23.5, 13.6.  $^{19}\text{F}$  NMR (282 MHz,  $\text{CDCl}_3$ )  $\delta$  -72.5 (s, 3F). IR (thin film):  $\nu_{\text{max}}$  3370, 1742  $\text{cm}^{-1}$ . MS (ESI):  $m/z$  (%) 360 ( $\text{M}^+ + \text{H}^+$ ). HRMS: Calculated for  $\text{C}_{18}\text{H}_{24}\text{NO}_3\text{F}_3\text{Na}$  ( $\text{M}^+ + \text{Na}^+$ ): 382.16005; Found: 382.15994.

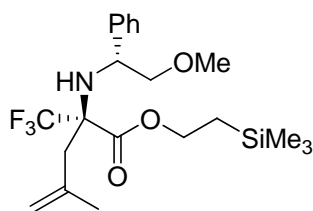

**(R)-2-(Trimethylsilyl)ethyl 2-((R)-2-methoxy-1-phenylethylamino)-4-methyl-2-(trifluoromethyl)pent-4-enoate**

**(3g).** Compound **3g** (110 mg, 85% yield) was prepared as above described from **1b** (113 mg, 0.3 mmol) as a yellow oil. The product was purified with silica gel chromatography (Petroleum ether /Ethyl Acetate = 80:1).  $[\alpha]_{\text{D}}^{25} = -45.7$  ( $c$  3.5,  $\text{CHCl}_3$ );  $^1\text{H}$  NMR (300 MHz,  $\text{CDCl}_3$ )  $\delta$  7.33-7.19 (m, 5H), 4.86 (s, 1H), 4.81 (s, 1H), 4.23 (t,  $J = 5.7$  Hz, 1H), 4.08-4.05 (m, 1H),

3.92-3.89 (m, 1H), 3.39-3.35 (m, 2H), 3.30 (s, 3H), 2.81 (br, 1H), 2.60 (d,  $J = 14.9$  Hz, 1H), 2.51 (d,  $J = 14.9$  Hz, 1H), 1.67 (s, 3H), 0.88-0.81 (m, 2H), -0.02 (s, 9H).  $^{13}\text{C}$  NMR (75.4 MHz,  $\text{CDCl}_3$ )  $\delta$  168.5, 142.2, 139.4, 128.0, 127.3, 127.1, 125.0 (q,  $J = 288.0$  Hz), 115.5, 77.5, 67.3 (q,  $J = 25.6$  Hz), 64.4, 58.7, 56.7, 39.5, 23.5, 16.9, -1.7.  $^{19}\text{F}$  NMR (282 MHz,  $\text{CDCl}_3$ )  $\delta$  -72.5 (s, 3F). IR (thin film):  $\nu_{\text{max}}$  3344, 3031, 1739, 1651  $\text{cm}^{-1}$ . MS (ESI):  $m/z$  (%) 432 ( $\text{M}^+ + \text{H}^+$ ). HRMS: Calculated for  $\text{C}_{21}\text{H}_{32}\text{NO}_3\text{F}_3\text{SiNa}$  ( $\text{M}^+ + \text{Na}^+$ ): 454.19958; Found: 454.20001.

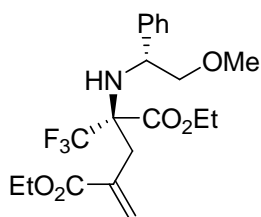

**(R)-Diethyl 2-((R)-2-methoxy-1-phenylethylamino)-4-methylene-2-(trifluoromethyl)pentane**

**Dioate (3h).** Compound **3h** (110 mg, 88% yield) was prepared as above described from **1a** (91 mg, 0.3 mmol) as a yellow oil (Note: The reaction was quenched with water instead of HCl (1 M, 2 mL)). The product was purified with silica gel chromatography (Petroleum ether /Ethyl Acetate = 80:1).  $[\alpha]_{\text{D}}^{25} = -38.3$  ( $c$  5.9,  $\text{CHCl}_3$ );  $^1\text{H}$  NMR (300 MHz,  $\text{CDCl}_3$ )  $\delta$  7.29-7.20 (m, 5H), 6.28 (s, 1H), 5.68 (s, 1H), 4.25-4.17 (m, 3H), 3.95-3.89 (m, 1H), 3.78-3.72 (m, 1H), 3.42 (d,  $J = 6.3$  Hz, 2H), 3.29 (s, 3H), 2.95 (s, 2H), 2.88 (br, 1H), 1.30 (t,  $J = 7.2$  Hz, 3H), 0.99 (t,  $J = 7.1$  Hz, 3H).  $^{13}\text{C}$  NMR (75.4 MHz,  $\text{CDCl}_3$ )  $\delta$  167.6, 167.0, 142.3, 134.9, 128.7, 127.8, 127.1, 126.9, 125.1 (q,  $J = 289.6$  Hz), 77.4, 68.2 (q,  $J = 25.3$  Hz), 61.6, 61.0, 58.7, 57.0, 33.8, 14.0, 13.3.  $^{19}\text{F}$  NMR (282 MHz,  $\text{CDCl}_3$ )  $\delta$  -71.9 (s, 3F). IR (thin film):  $\nu_{\text{max}}$  3350, 2986, 1744  $\text{cm}^{-1}$ . MS (EI):  $m/z$  (%) 372 ( $\text{M}^+ - \text{C}_2\text{H}_5\text{O}$ , 100), 157, 135, 131, 91. HRMS: Calculated for  $\text{C}_{20}\text{H}_{26}\text{NO}_5\text{F}_3$  ( $\text{M}^+$ ): 417.1763; Found: 417.1754.

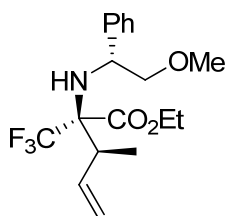

**(2R,3S)-Ethyl 2-((R)-2-methoxy-1-phenylethylamino)-3-methyl-2-(trifluoromethyl)pent-4-**

**Enoate (3i).** Compound **3i** (90 mg, 82% yield) was prepared as above described from **1a** (91 mg, 0.3 mmol) as a yellow oil. The product was purified with silica gel chromatography (Petroleum ether /Ethyl Acetate = 80:1).  $^1\text{H}$  NMR (300 MHz,  $\text{CDCl}_3$ )  $\delta$  7.33-7.19 (m, 5H), 5.90 (m, 1H), 5.20-5.15 (m, 2H), 4.17 (t,  $J = 5.4$  Hz, 1H), 3.94-3.88 (m, 1H), 3.65-3.60 (m, 1H), 3.59-3.43 (m,

2H), 3.28 (s, 3H), 2.92 (t,  $J = 7.5$  Hz, 1H), 2.61 (br, 1H), 1.13 (d,  $J = 6.6$  Hz, 3H), 0.97 (t,  $J = 7.5$  Hz, 3H).  $^{13}\text{C}$  NMR (100 MHz,  $\text{CDCl}_3$ )  $\delta$  168.0, 142.6, 137.5, 127.8, 127.3, 126.8, 125.7 (q,  $J = 289.0$  Hz), 117.7, 77.4, 70.4 (q,  $J = 24.3$  Hz), 61.2, 58.9, 57.1, 43.1, 15.2, 13.5.  $^{19}\text{F}$  NMR (282 MHz,  $\text{CDCl}_3$ )  $\delta$  -67.1 (s, 3F). IR (thin film):  $\nu_{\text{max}}$  3360, 2985, 1743  $\text{cm}^{-1}$ . MS (ESI):  $m/z$  (%) 360 ( $\text{M}^+ + \text{H}^+$ ). HRMS: Calculated for  $\text{C}_{18}\text{H}_{24}\text{NO}_3\text{F}_3\text{Na}$  ( $\text{M}^+ + \text{Na}^+$ ): 382.16005; Found: 382.15987.

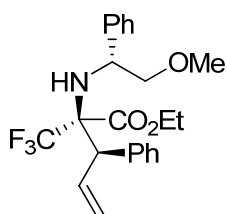

**(2*R*,3*R*)-Ethyl 2-((*R*)-2-methoxy-1-phenylethylamino)-3-phenyl-2-(trifluoromethyl)pent-4-enoate (3j).** Compound **3j** (110 mg, 92% yield) was prepared as above described from **1a** (91 mg, 0.3 mmol) as a yellow oil. The product was purified with silica gel chromatography (Petroleum ether /Ethyl Acetate = 100:1).  $[\alpha]_{\text{D}}^{25} = -48.1$  ( $c$  2.0,  $\text{CHCl}_3$ );  $^1\text{H}$  NMR (300 MHz,  $\text{CDCl}_3$ )  $\delta$  7.38-7.17 (m, 10H), 6.37 (m, 1H), 5.29-5.16 (m, 2H), 4.11 (t,  $J = 5.1$  Hz, 1H), 4.03 (d,  $J = 9.6$  Hz, 1H), 3.69-3.63 (m, 1H), 3.58-3.41 (m, 3H), 3.26 (s, 3H), 2.81 (d,  $J = 5.1$  Hz 1H), 0.69 (t,  $J = 7.4$  Hz, 3H).  $^{13}\text{C}$  NMR (100 MHz,  $\text{CDCl}_3$ )  $\delta$  167.2, 142.4, 137.3, 134.6, 129.4, 127.9, 127.6, 127.3, 127.1, 126.6, 125.3 (q,  $J = 291.0$  Hz), 119.5, 76.5 71.7 (q,  $J = 23.0$  Hz), 61.1, 58.7, 57.2, 54.9, 12.8.  $^{19}\text{F}$  NMR (282 MHz,  $\text{CDCl}_3$ )  $\delta$  -65.2 (s, 3F). IR (thin film):  $\nu_{\text{max}}$  3375, 3088, 1740, 1638, 1603  $\text{cm}^{-1}$ . MS (ESI):  $m/z$  (%) 422 ( $\text{M}^+ + \text{H}^+$ ). HRMS: Calculated for  $\text{C}_{23}\text{H}_{27}\text{NO}_3\text{F}_3$  ( $\text{M}^+ + \text{H}^+$ ): 422.19375; Found: 422.19471.

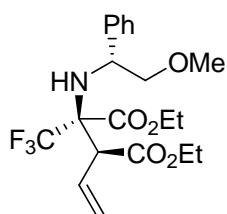

**(2*R*,3*S*)-Diethyl 2-((*R*)-2-methoxy-1-phenylethylamino)-2-(trifluoromethyl)-3-vinylsuccinate (3k).** Compound **3k** (75 mg, 60% yield) as a yellow oil was prepared as above described with utilization of In powder (96 mg, 0.84 mmol) and allyl bromide **2f** (0.96 mmol) from **1a** (91 mg, 0.3 mmol) The product was purified with silica gel chromatography (Petroleum ether /Ethyl Acetate = 80:1). (Note: The reaction was quenched with water instead of HCl (1 M, 2 mL)).  $^1\text{H}$  NMR (300 MHz,  $\text{CDCl}_3$ )  $\delta$  7.30-7.23 (m, 5H), 6.11 (m, 1H), 5.34-5.26 (m, 2H), 4.18-4.10 (m, 3H), 3.88-3.82

(m, 1H), 3.66 (d,  $J = 9.6$  Hz, 2H), 3.56-3.49 (m, 2H), 3.46-3.40 (m, 1H), 3.30 (s, 3H), 1.23 (t,  $J = 7.2$  Hz, 3H), 0.95 (t,  $J = 7.2$  Hz, 3H).  $^{13}\text{C}$  NMR (75.4 MHz,  $\text{CDCl}_3$ )  $\delta$  169.5, 166.6, 141.4, 130.7, 127.9, 127.4, 127.2, 124.8 (q,  $J = 290.2$  Hz), 121.7, 77.4, 69.0 (q,  $J = 24.7$  Hz), 61.5, 58.8, 57.3, 54.7, 13.7, 13.3.  $^{19}\text{F}$  NMR (282 MHz,  $\text{CDCl}_3$ )  $\delta$  -68.8 (s, 3F). IR (thin film):  $\nu_{\text{max}}$  3360, 3034, 1747, 1637  $\text{cm}^{-1}$ . MS (EI):  $m/z$  (%) 372 ( $\text{M}^+ - \text{C}_2\text{H}_5\text{O}$ , 100), 135, 58, 43. HRMS: Calculated for  $\text{C}_{18}\text{H}_{21}\text{NO}_4\text{F}_3$  ( $\text{M}^+ - \text{C}_2\text{H}_5\text{O}$ ): 372.1423; Found: 372.1422.

### Preparation of (3*R*, 5*R*)-4b.

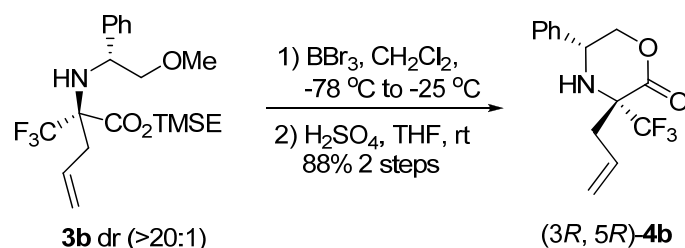

**(3*R*,5*R*)-3-allyl-5-phenyl-3-(trifluoromethyl)morpholin-2-one (4b).** To a solution of **3b** (84 mg, 0.2 mmol) in  $\text{CH}_2\text{Cl}_2$  (2 mL) was added dropwise  $\text{BBr}_3$  (2 M in  $\text{CH}_2\text{Cl}_2$ , 0.5 mL, 1 mmol) at  $-78$  °C. After stirring for 1 h at the same temperature, the reaction mixture was warmed to  $-25$  °C and stirred for 4 h. The reaction was quenched with brine, extracted with  $\text{CH}_2\text{Cl}_2$ , washed with water, dried over anhydrous  $\text{Na}_2\text{SO}_4$ , filtered, and concentrated to provide crude amino alcohol which was used to do the next step without further purification. The crude amino alcohol was dissolved in anhydrous THF (4 mL) under  $\text{N}_2$ . Concentrated  $\text{H}_2\text{SO}_4$  (15  $\mu\text{L}$ ) was added, and the resulting mixture was stirred at room temperature for 3 days. The reaction mixture was diluted with ethyl acetate, washed with saturated  $\text{NaHCO}_3$ , brine, dried over  $\text{Na}_2\text{SO}_4$ , filtered, and concentrated. The residue was purified with silica gel chromatography (Petroleum ether /Ethyl Acetate = 50:1) to give **(3*R*,5*R*)-4b** 50 mg (88% overall yield, 2 steps) as a white solid. This compound is known.<sup>3</sup>  $[\alpha]_{\text{D}}^{25} = 13.7$  ( $c$  1.8,  $\text{CHCl}_3$ );  $^1\text{H}$  NMR (300 MHz,  $\text{CDCl}_3$ )  $\delta$  7.43-7.37 (m, 5H), 5.82 (m, 1H), 5.33-5.25 (m, 2H), 4.37-4.26 (m, 3H), 3.16 (dd,  $J = 13.6$  Hz, 6.6 Hz, 1H), 2.54 (dd,  $J = 13.6$  Hz, 7.8 Hz, 1H), 2.08 (br, 1H).  $^{19}\text{F}$  NMR (282 MHz,  $\text{CDCl}_3$ )  $\delta$  -76.9 (s, 3F).

### Preparation of optically pure **4j**.

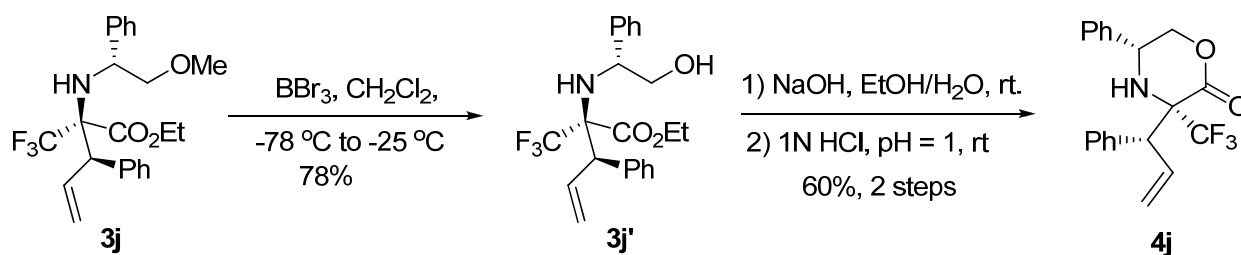

**(3R,5R)-5-phenyl-3-((R)-1-phenylallyl)-3-(trifluoromethyl)morpholin-2-one (4j)**. To a solution of **3j** (66 mg, 0.16 mmol) in CH<sub>2</sub>Cl<sub>2</sub> (2 mL) was added dropwise BBr<sub>3</sub> (4 M in CH<sub>2</sub>Cl<sub>2</sub>, 0.2 mL, 0.8 mmol) at -78 °C. After stirring for 2 h at the same temperature, the reaction mixture was warmed to -25 °C and stirred for 4 h. The reaction was quenched with brine at same temperature, extracted with CH<sub>2</sub>Cl<sub>2</sub>, washed with water, dried over anhydrous Na<sub>2</sub>SO<sub>4</sub>, filtered, and concentrated. The residue was purified with silica gel chromatography ((Petroleum ether /Ethyl Acetate = 20:1) to give **3j'** (51 mg, 78%). <sup>1</sup>H NMR (300 MHz, CDCl<sub>3</sub>) δ 7.34-7.25 (m, 10H), 6.42 (m, 1H), 5.33-5.23 (m, 2H), 4.08-4.00 (m, 2H), 3.80-3.64 (m, 3H), 3.54-3.44 (m, 1H), 2.32 (br, 2H), 0.73 (t, *J* = 7.5 Hz, 3H). <sup>19</sup>F NMR (282 MHz, CDCl<sub>3</sub>) δ -65.5 (s, 3F).

**3j'** (20 mg, 0.05 mmol) was dissolved in THF (2 mL), a solution of NaOH (3 mg, 0.075 mmol) in H<sub>2</sub>O (2 mL) was added. The resulting mixture was stirred at room temperature for 36 h. The reaction was quenched with 1N HCl and adjusted pH value to 1-2. The resulting mixture was extracted with EtOAc, dried over Na<sub>2</sub>SO<sub>4</sub>, filtered, and concentrated. The residue was purified with silica gel chromatography (Petroleum ether /Ethyl Acetate = 50:1) to give **(3R,5R)-4j** 11 mg (60% yield) as a white solid.  $[\alpha]_D^{25} = -49.6$  (*c* 0.91, CHCl<sub>3</sub>). <sup>1</sup>H NMR (300 MHz, CDCl<sub>3</sub>) δ 7.36 (m, 8H), 7.24 (m, 2H), 6.24 (m, 1H), 5.40-5.30 (m, 2H), 4.65 (d, *J* = 9.9 Hz, 1H), 4.22 (t, *J* = 10.8 Hz, 1H), 3.95 (dd, *J* = 10.5 Hz, 3.0 Hz, 1H), 3.29 (dd, *J* = 10.5 Hz, 2.4 Hz, 1H), 2.43 (br, 1H). <sup>13</sup>C NMR (100.6 MHz, CDCl<sub>3</sub>) δ 164.7, 137.5, 136.5, 131.5, 129.3, 129.1, 129.0, 128.0, 127.3, 124.0 (q, *J* = 285.7 Hz), 120.4, 73.9, 70.4 (q, *J* = 24.1 Hz), 54.1, 53.3. <sup>19</sup>F NMR (282 MHz, CDCl<sub>3</sub>) δ -72.8 (s, 3F). IR (thin film):  $\nu_{\max}$  3350, 1735 cm<sup>-1</sup>. MS (ESI): *m/z* (%) 384 (M<sup>+</sup> + Na<sup>+</sup>), 362 (M<sup>+</sup> + H<sup>+</sup>). HRMS: Calculated for C<sub>20</sub>H<sub>19</sub>NO<sub>2</sub>F<sub>3</sub> (M<sup>+</sup> + H<sup>+</sup>): 362.13624; Found: 362.13701.

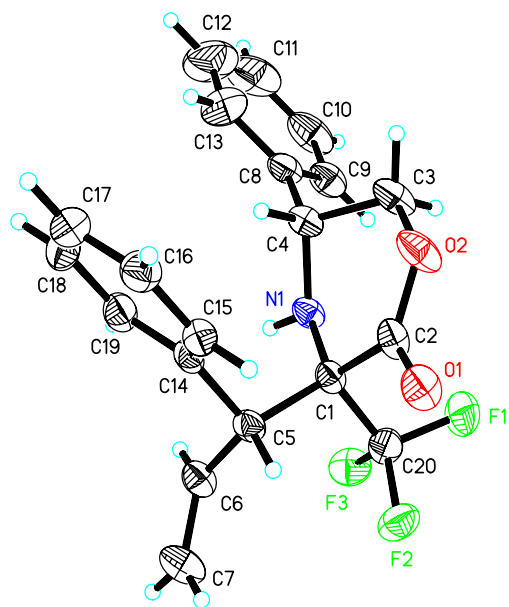

4j

Bond precision: C-C = 0.0051 Å Wavelength=0.71073  
 Cell: a=7.8902(10) b=12.4068(16) c=9.9490(12)  
 alpha=90 beta=113.018 gamma=90  
 (2)  
 Temperature: 293 K

|                        | Calculated      | Reported        |
|------------------------|-----------------|-----------------|
| Volume                 | 896.4(2)        | 896.39(19)      |
| Space group            | P 21            | P2(1)           |
| Hall group             | P 2yb           | ?               |
| Moiety formula         | C20 H18 F3 N O2 | ?               |
| Sum formula            | C20 H18 F3 N O2 | C20 H18 F3 N O2 |
| Mr                     | 361.35          | 361.35          |
| Dx, g cm <sup>-3</sup> | 1.339           | 1.339           |
| Z                      | 2               | 2               |
| Mu (mm <sup>-1</sup> ) | 0.107           | 0.107           |
| F000                   | 376.0           | 376.0           |
| F000'                  | 376.24          |                 |
| h, k, lmax             | 9, 15, 12       | 9, 15, 12       |
| Nref                   | 1752[ 3335]     | 1749            |
| Tmin, Tmax             | 0.960, 0.976    | 0.392, 1.000    |
| Tmin'                  | 0.959           |                 |

Correction method= EMPIRICAL  
 Data completeness= 1.00/0.52 Theta(max)= 25.500  
 R(reflections)= 0.0374( 1592) wR2(reflections)= 0.0926( 1749)  
 S = 1.022 Npar= 240

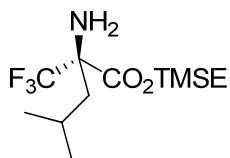

**(R)-2-(Trimethylsilyl)ethyl 2-amino-4-methyl-2-(trifluoromethyl)pentanoate (5).** To a solution of **3g** (50 mg, 0.116 mmol) in MeOH (5 mL) was added Pd(OH)<sub>2</sub>/C (20%, 21.5 mg). The resulting mixture was stirred under H<sub>2</sub> (5 atm) for 24 h at room temperature. The mixture was filtered with celite and the filtrate was concentrated without further purification to give (R)- $\alpha$ -Tfm-Leu **5** 28 mg (80% yield) as a light yellow oil.  $[\alpha]_D^{25} = -4.85$  (*c* 0.75, CHCl<sub>3</sub>). <sup>1</sup>H NMR (300 MHz, CDCl<sub>3</sub>)  $\delta$  4.29 (m, 2H), 2.03 (dd, *J* = 13.8 Hz, 7.8 Hz, 1H), 1.82 (m, 2H), 1.65 (dd, *J* = 13.8 Hz, 5.4 Hz, 1H), 1.05 (dd, *J* = 10.8 Hz, 7.2 Hz, 2H), 1.00 (d, *J* = 6.9 Hz, 3H), 0.87 (d, *J* = 6.9 Hz, 3H), 0.06 (s, 9H). <sup>13</sup>C NMR (75.4 MHz, CDCl<sub>3</sub>)  $\delta$  169.6, 125.2 (q, *J* = 285.9 Hz), 64.9, 64.3 (q, *J* = 26.1 Hz), 40.0, 24.4, 23.7, 22.4, 17.1, -1.7. <sup>19</sup>F NMR (282 MHz, CDCl<sub>3</sub>)  $\delta$  -78.3 (s, 3F). IR (thin film):  $\nu_{\max}$  2959, 1747, 1253 cm<sup>-1</sup>. MS (ESI): *m/z* (%) 256 (M<sup>+</sup> - C<sub>3</sub>H<sub>7</sub>), 154, 73 (100). HRMS: Calculated for C<sub>9</sub>H<sub>17</sub>NO<sub>2</sub>F<sub>3</sub>Si (M<sup>+</sup> - C<sub>3</sub>H<sub>7</sub>): 256.0981; Found: 256.0976.

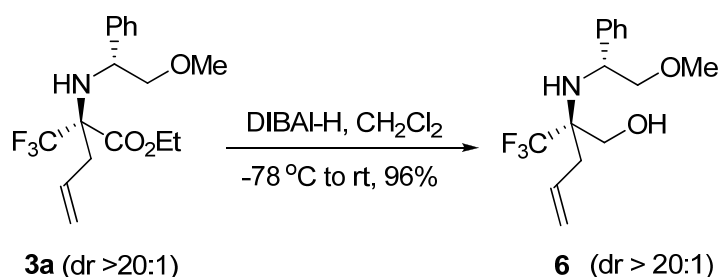

**(R)-2-((R)-2-methoxy-1-phenylethylamino)-2-(trifluoromethyl)pent-4-en-1-ol (6).** To a solution of **3a** (103 mg, 0.3 mmol) in CH<sub>2</sub>Cl<sub>2</sub> (3 mL) was added dropwise DIBAL-H (1 M in toluene, 0.9 mL, 0.9 mmol) at – 78 °C. After stirring for 1 h at the same temperature, the reaction mixture was warmed to room temperature and stirred for 1.5 h. The reaction was quenched with 1N HCl, and extracted with CH<sub>2</sub>Cl<sub>2</sub>, dried over Na<sub>2</sub>SO<sub>4</sub>, filtered and concentrated. The residue was purified with Al<sub>2</sub>O<sub>3</sub> chromatography (CH<sub>2</sub>Cl<sub>2</sub>/MeOH = 60:1) to give **6** 87 mg (96% yield).  $[\alpha]_D^{25} = -59.8$  (*c* 1.56). <sup>1</sup>H NMR (300 MHz, CDCl<sub>3</sub>) δ 7.44-7.28 (m, 5H), 5.76 (m, 1H), 5.12-5.06 (m, 2H), 4.23 (dd, *J* = 8.7 Hz, 3.6 Hz, 1H), 3.49 (d, *J* = 6.3 Hz, 2H), 3.44-3.31 (m, 5H), 2.43 (t, *J* = 7.4 Hz, 1H), 2.39 (dd, *J* = 14.7 Hz, 8.1 Hz), 2.29 (dd, *J* = 14.7 Hz, 7.5 Hz, 1H). <sup>13</sup>C NMR (100.6 MHz, CDCl<sub>3</sub>) δ 142.2, 131.6, 128.6, 127.8, 127.1 (q, *J* = 288.8 Hz), 126.9, 119.4, 77.7, 63.2 (q, *J* = 22.7 Hz), 61.1, 58.7, 55.7, 36.8. <sup>19</sup>F NMR (282 MHz, CDCl<sub>3</sub>) δ -71.8 (s, 3F). IR (thin film):  $\nu_{\max}$  3450, 3355, 1640 cm<sup>-1</sup>. MS (ESI): *m/z* (%) 304 (M<sup>+</sup> + H<sup>+</sup>), 326 (M<sup>+</sup> + Na<sup>+</sup>). HRMS: Calculated for C<sub>15</sub>H<sub>20</sub>NO<sub>2</sub>F<sub>3</sub>Na (M<sup>+</sup> + Na<sup>+</sup>): 326.13383; Found: 326.13403.

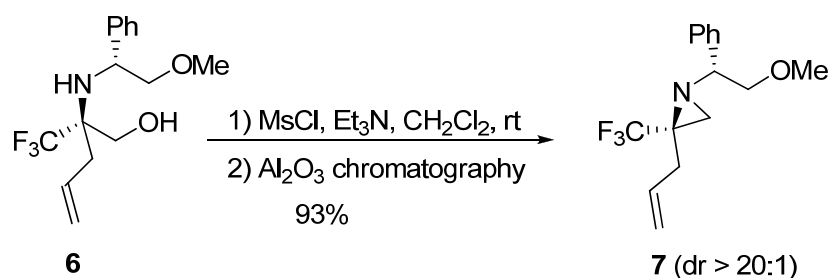

**(R)-2-allyl-1-((R)-2-methoxy-1-phenylethyl)-2-(trifluoromethyl)aziridine (7).** To a solution of **6** (45 mg, 0.15 mmol) in CH<sub>2</sub>Cl<sub>2</sub> (1.5 mL) was added Et<sub>3</sub>N (56 μL, 0.30 mmol), followed by MsCl (18 μL, 0.225 mmol) at 0 °C. The resulting mixture was then warmed to room temperature and stirred for 12 h. The reaction mixture was directly purified with Al<sub>2</sub>O<sub>3</sub> chromatography (pure CH<sub>2</sub>Cl<sub>2</sub>) to give **7** 40 mg (93% yield).  $[\alpha]_D^{25} = -100.0$  (*c* 1.6). <sup>1</sup>H NMR (300 MHz, CDCl<sub>3</sub>) δ



7.42-7.27 (m, 5H), 5.56 (m, 1H), 5.03-4.97 (m, 2H), 3.68 (dd,  $J = 9.6$  Hz, 8.1 Hz, 1H), 3.50 (dd,  $J = 9.6$  Hz, 3.9 Hz, 1H), 3.37 (m, 1H), 3.35 (s, 3H), 2.42 (s, 1H), 2.34 (dd,  $J = 15.6$  Hz, 6.3 Hz, 1H), 2.20 (dd,  $J = 15.6$  Hz, 7.5 Hz, 1H), 1.83 (s, 1H).  $^{13}\text{C}$  NMR (75.4 MHz,  $\text{CDCl}_3$ )  $\delta$  139.7, 133.8, 128.4, 127.6, 127.2, 125.2 (q,  $J = 276.9$  Hz), 117.6, 78.9, 66.1, 59.1, 35.1, 28.9.  $^{19}\text{F}$  NMR (282 MHz,  $\text{CDCl}_3$ )  $\delta$  -73.2 (s, 3F). IR (thin film):  $\nu_{\text{max}}$  1643, 1454, 1123  $\text{cm}^{-1}$ . MS (ESI):  $m/z$  (%) 286 ( $\text{M}^+ + \text{H}^+$ ). HRMS: Calculated for  $\text{C}_{15}\text{H}_{19}\text{NOF}_3$  ( $\text{M}^+ + \text{H}^+$ ): 286.14133; Found: 286.14184.

### References:

- (1) (a) Uneyama, K.; Tamura, K.; Mizukami, H.; Maeda, K.; Watanabe, H. *J. Org. Chem.* **1993**, *58*, 32-35. (b) Watanabe, H.; Hashizume, Y.; Uneyama, K. *Tetrahedron Lett.* **1992**, *33*, 4333-4336. (c) Amii, H.; Kishikawa, Y.; Kageyama, K.; Uneyama, K. *J. Org. Chem.* **2000**, *63*, 3404-3408.
- (2) Fustero, S.; Sanchez-Rosello, M.; Rodrigo, V.; Pozo, C.; Sanz-Cervera, J. F.; Simon, A. *Org. Lett.* **2006**, *8*, 4129.
- (3) Chaume, G.; Van Severen, M.-C.; Marinkovic, S.; Brigaud, T. *Org. Lett.* **2006**, *8*, 6123.

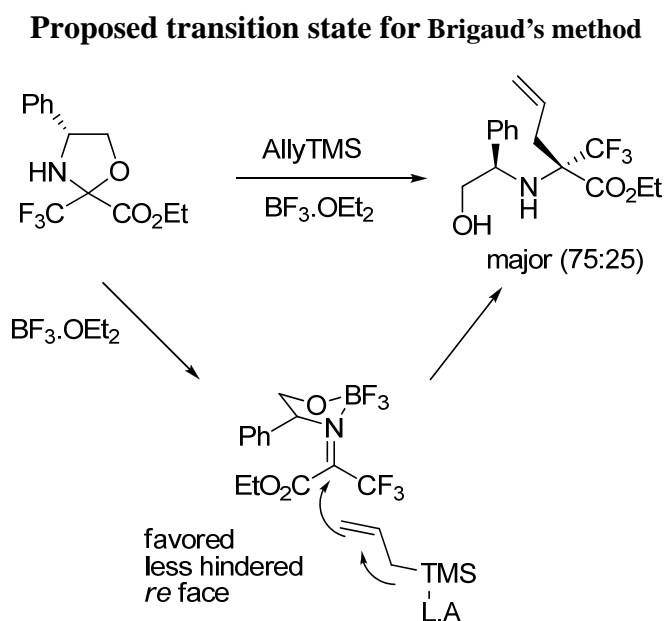

**(R)-Ethyl 3,3,3-trifluoro-2-(2-methoxy-1-phenylethylimino)propanoate (1a).**

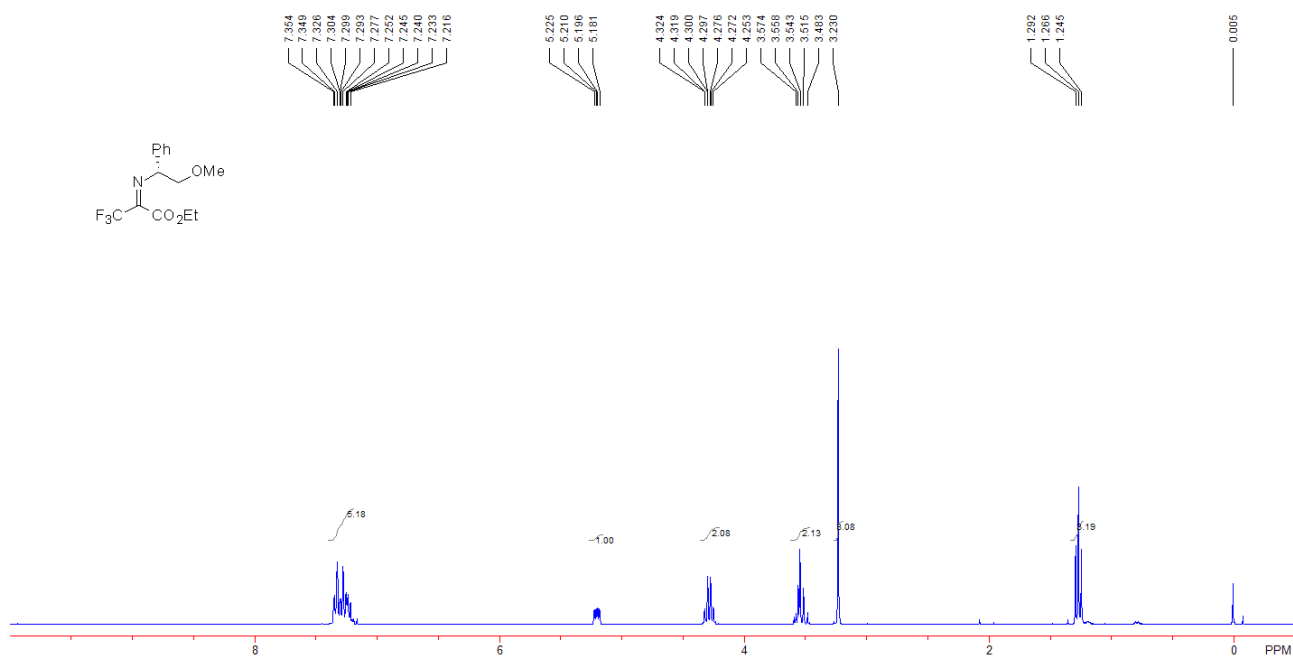

2009437-1-43

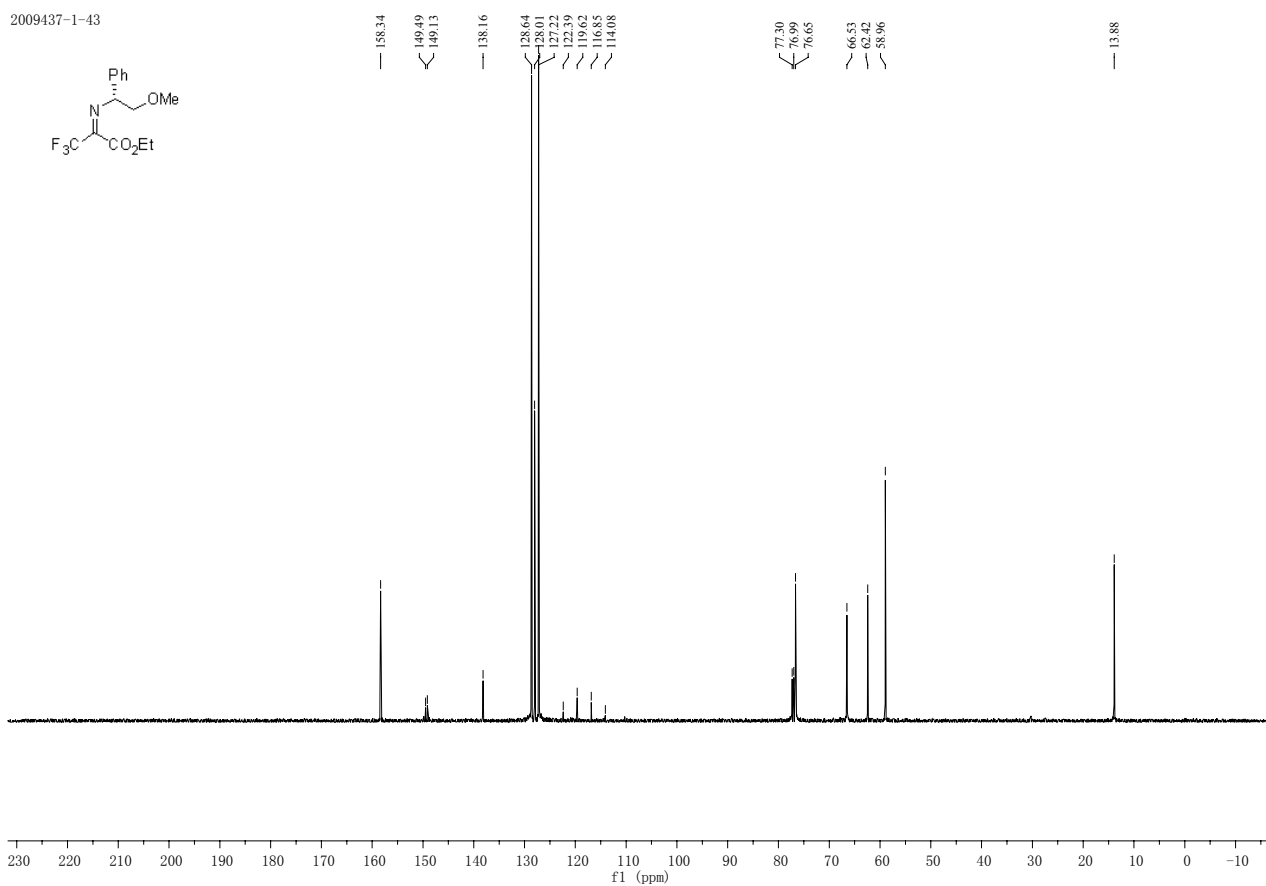

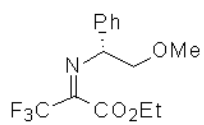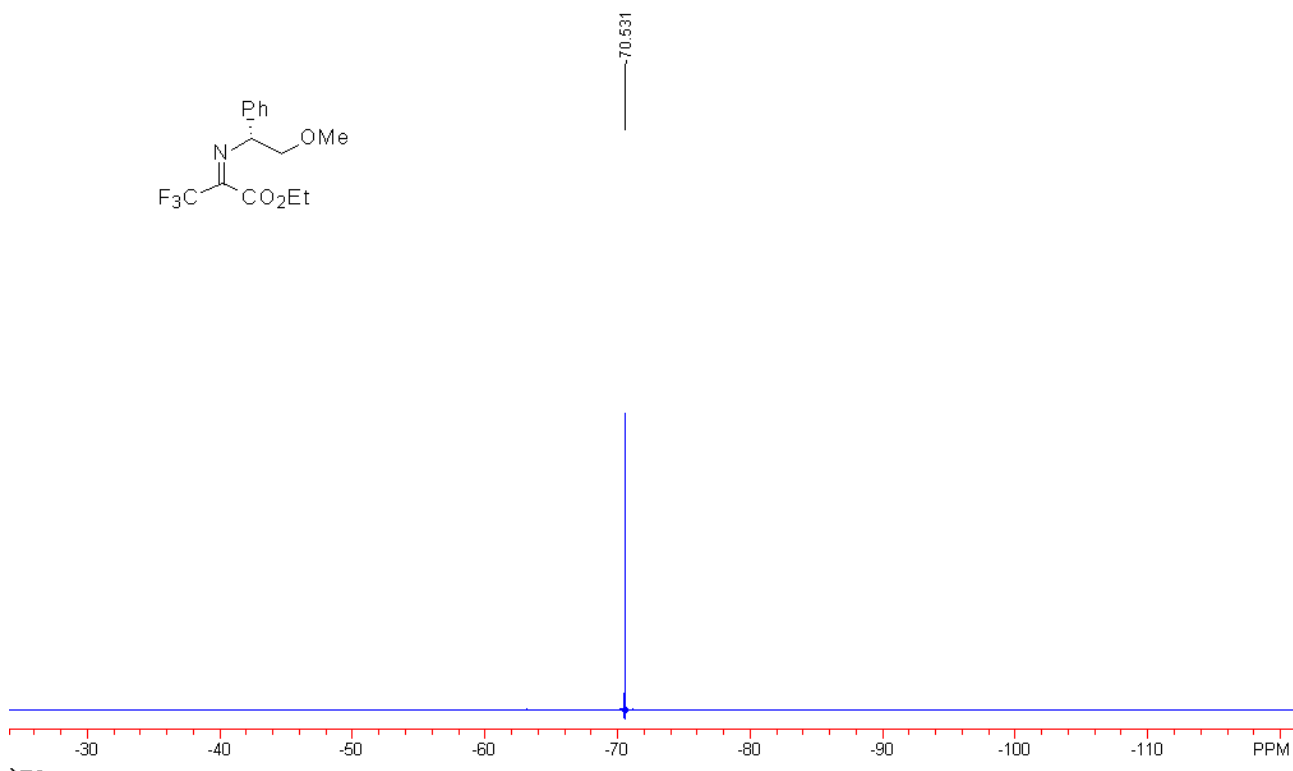

**(R)-2-(Trimethylsilyl)ethyl 3,3,3-trifluoro-2-(2-methoxy-1-phenylethylimino)propanoate (1b).**

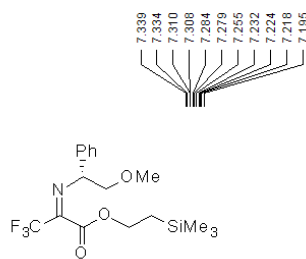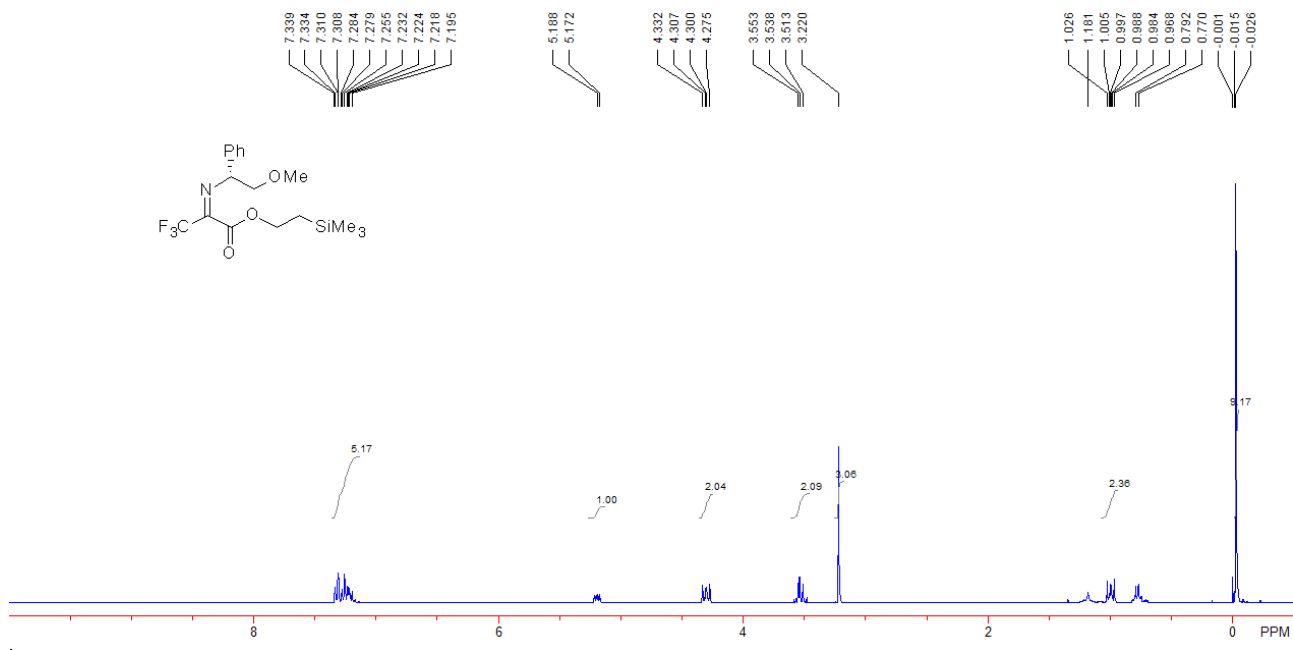

2009437-1-63C

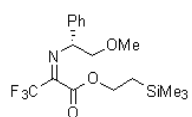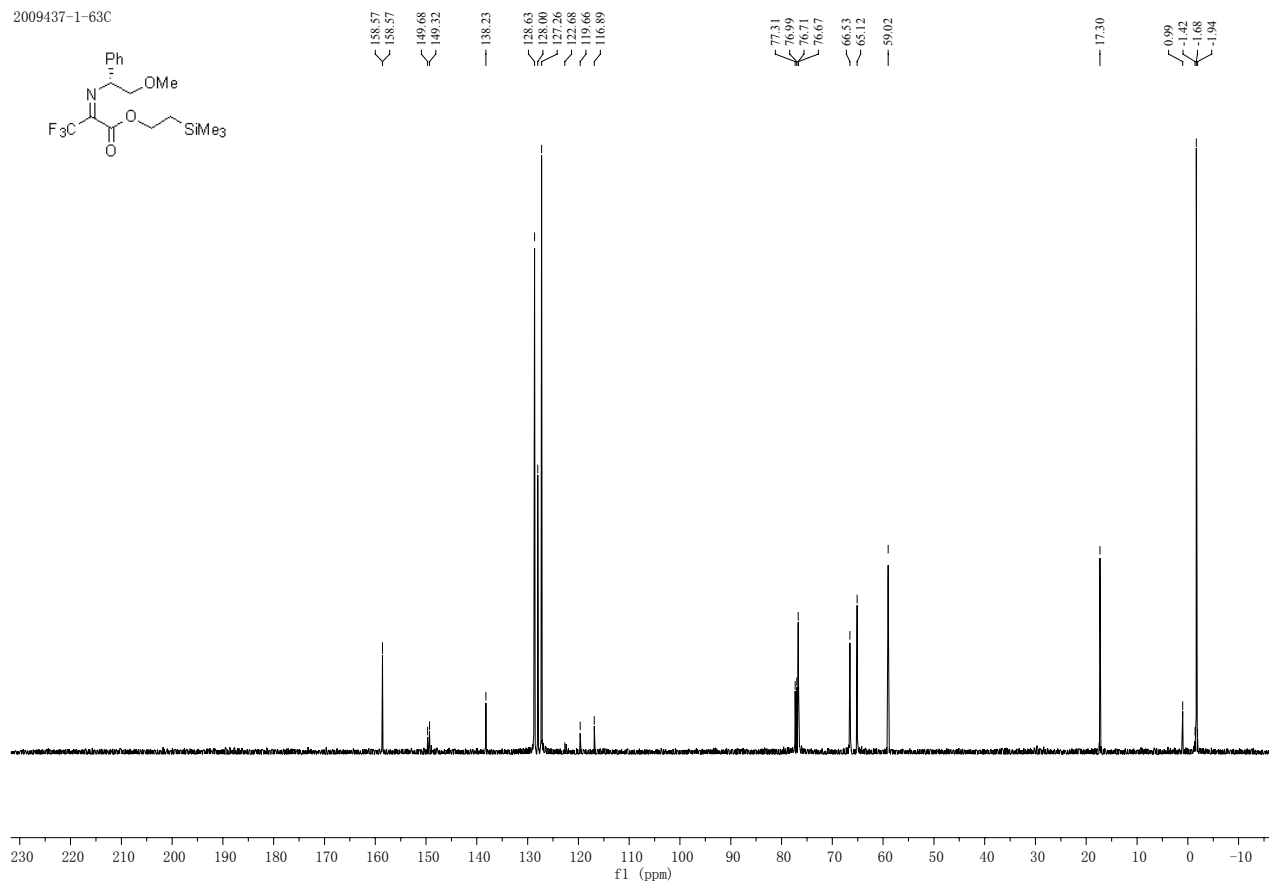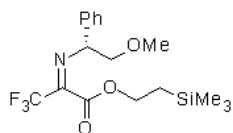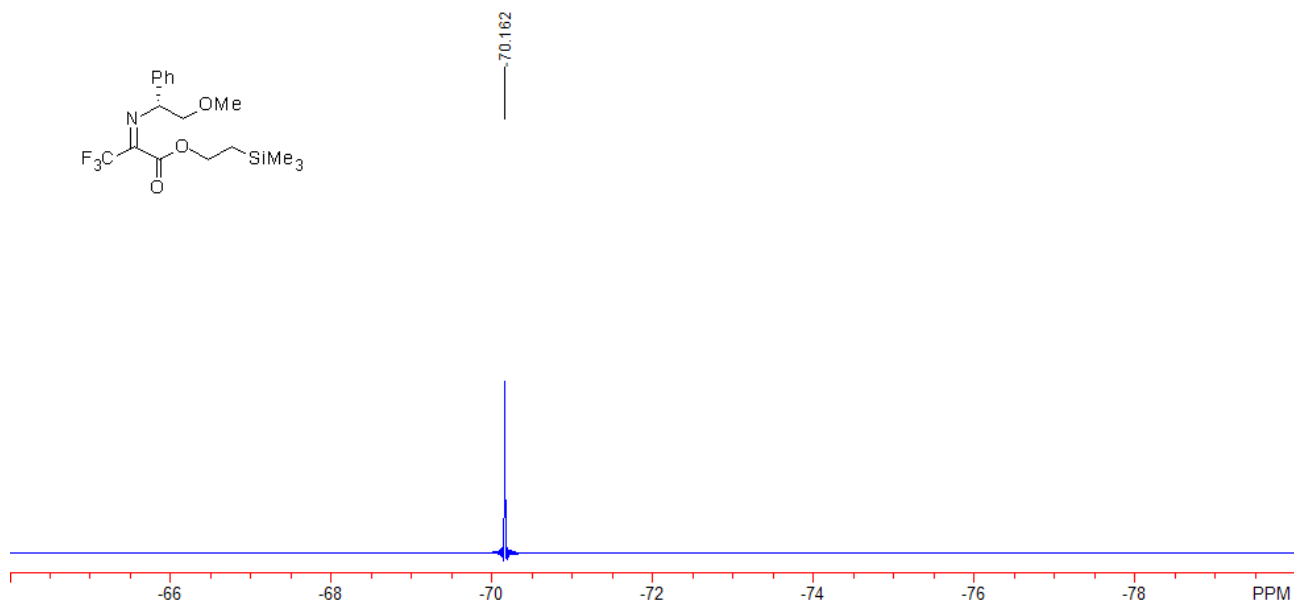

**(R)-Allyl 3,3,3-trifluoro-2-(2-methoxy-1-phenylethylamino)propanoate(1c).**

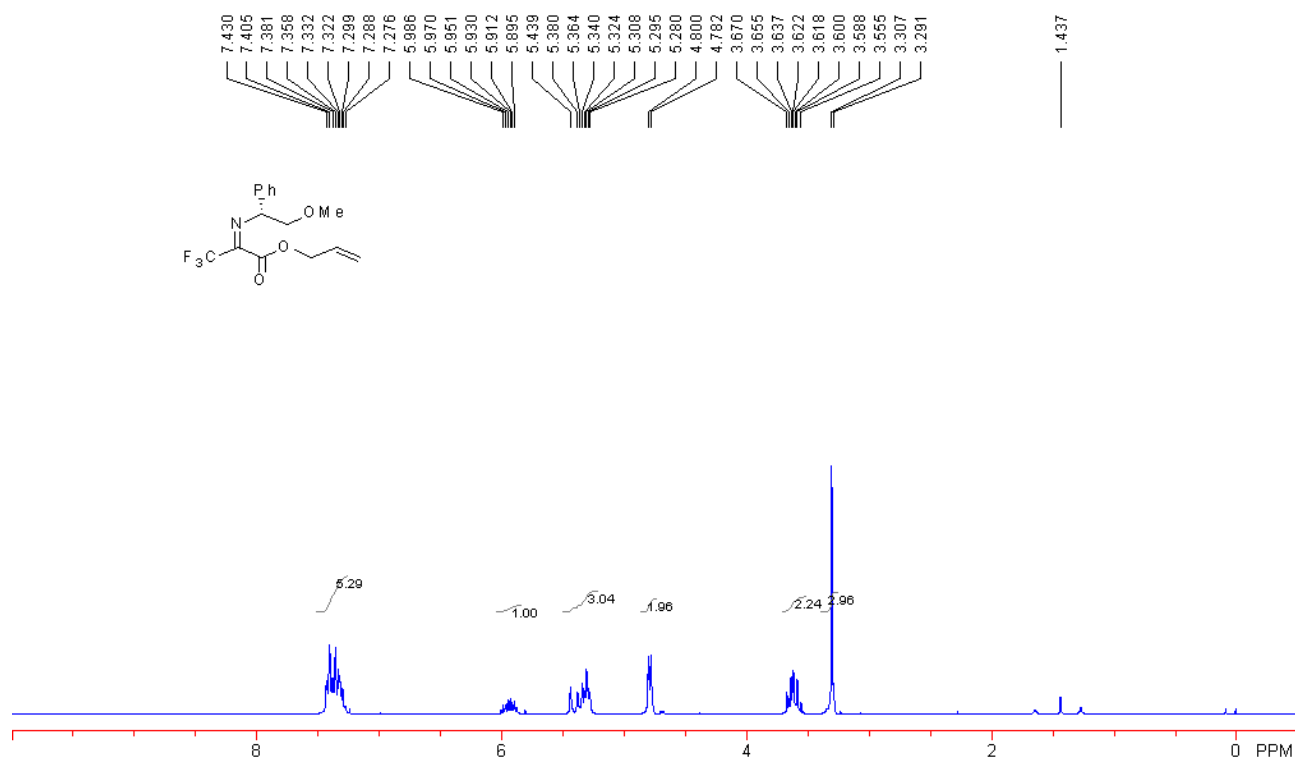

2009437-1-74-2

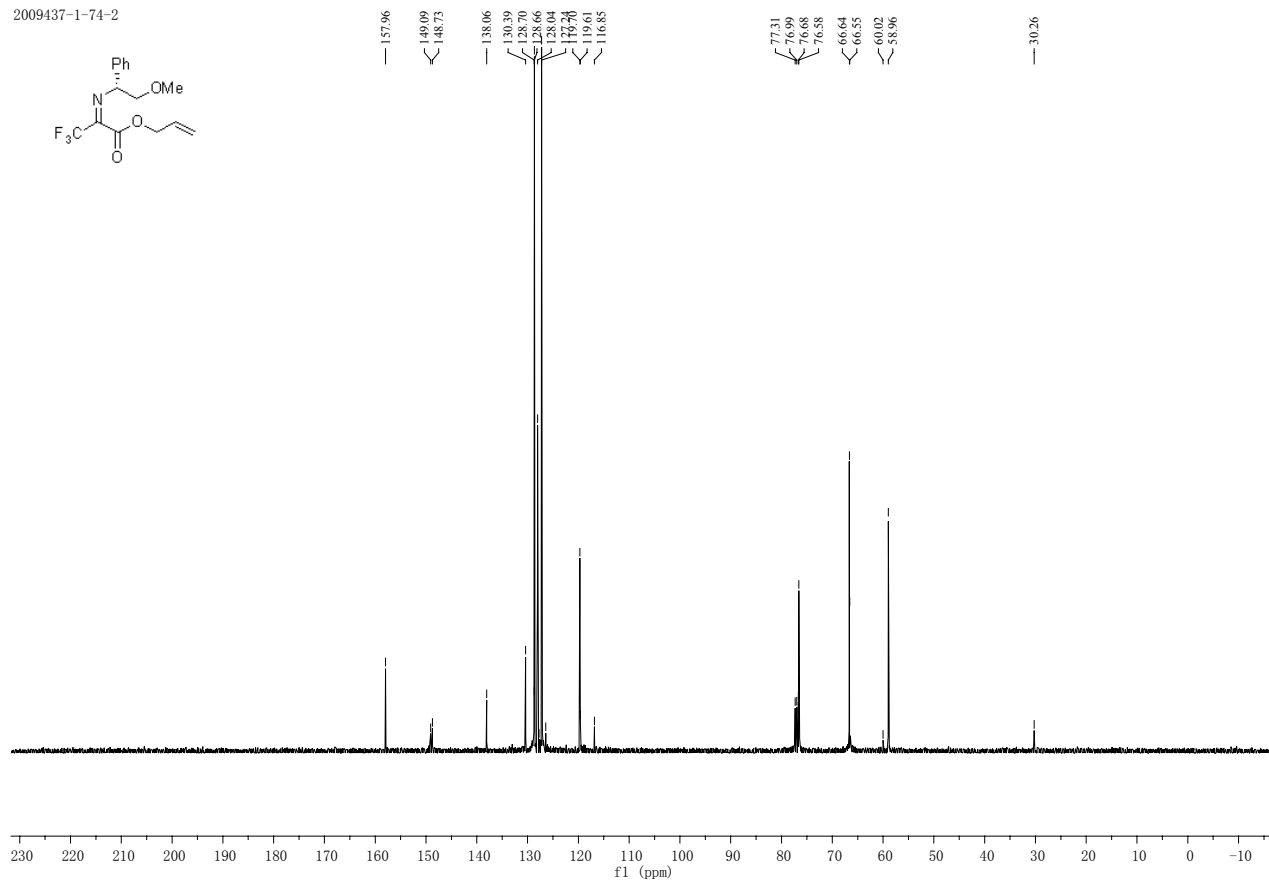

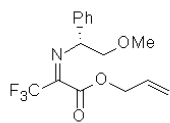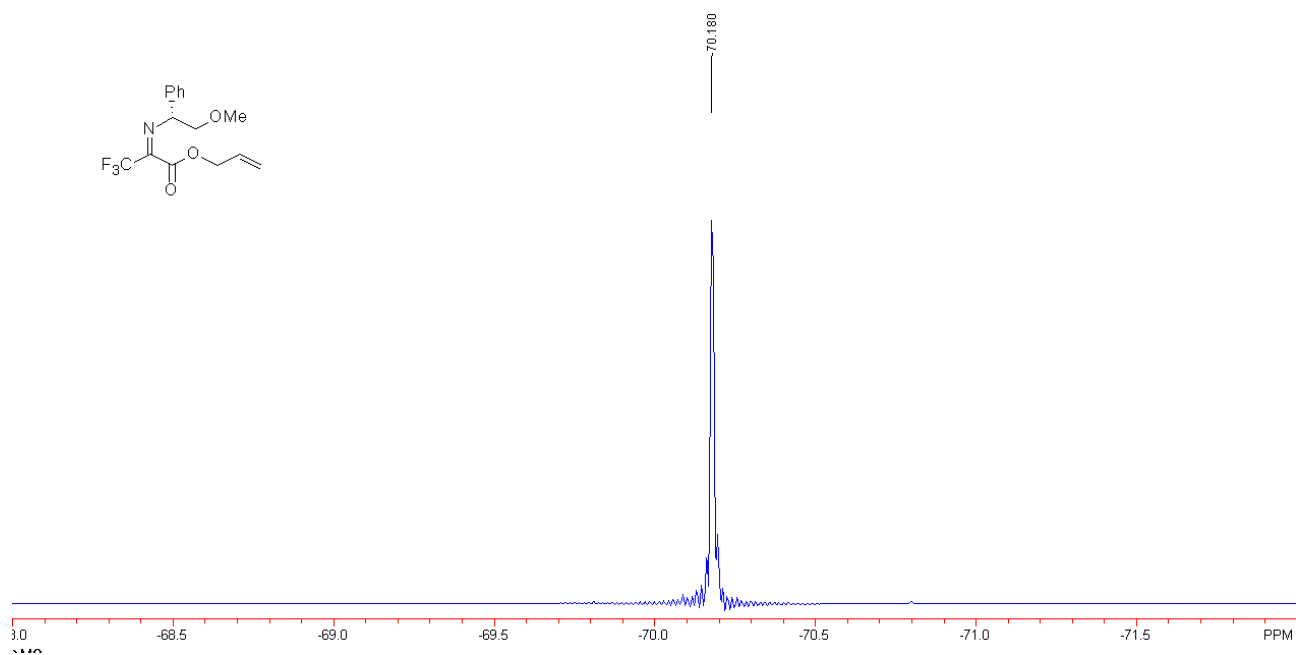

**(R)-prop-2-ynyl 3,3,3-trifluoro-2-(2-methoxy-1-phenylethylimino)propanoate (1d).**

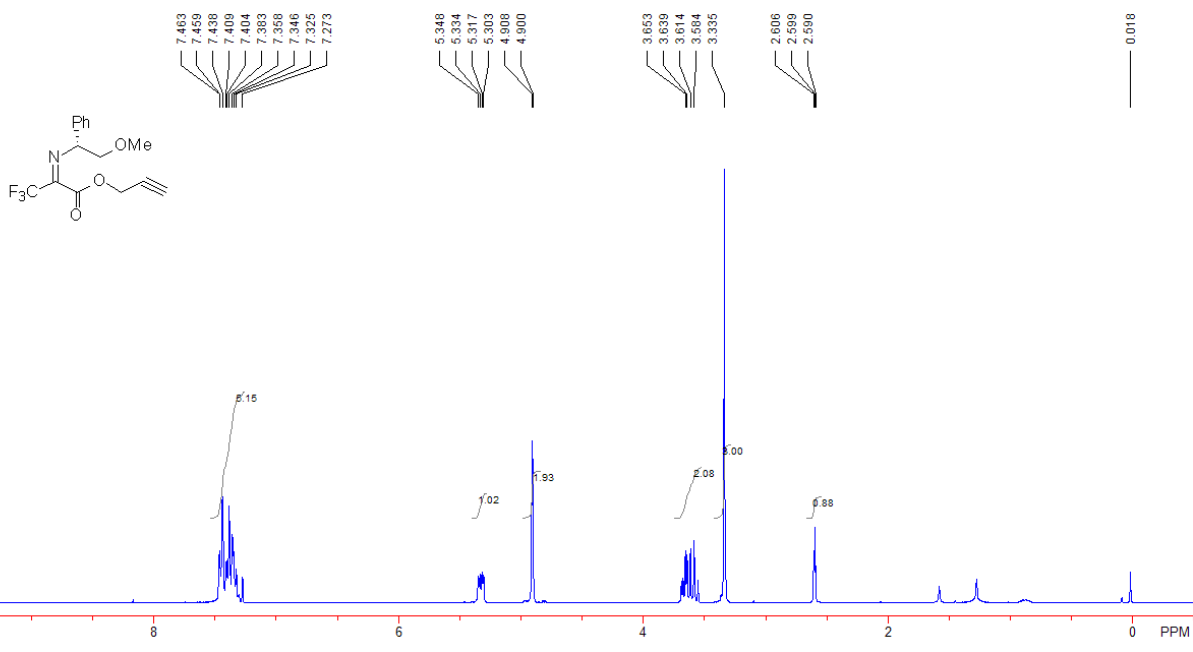

2009437-2-15

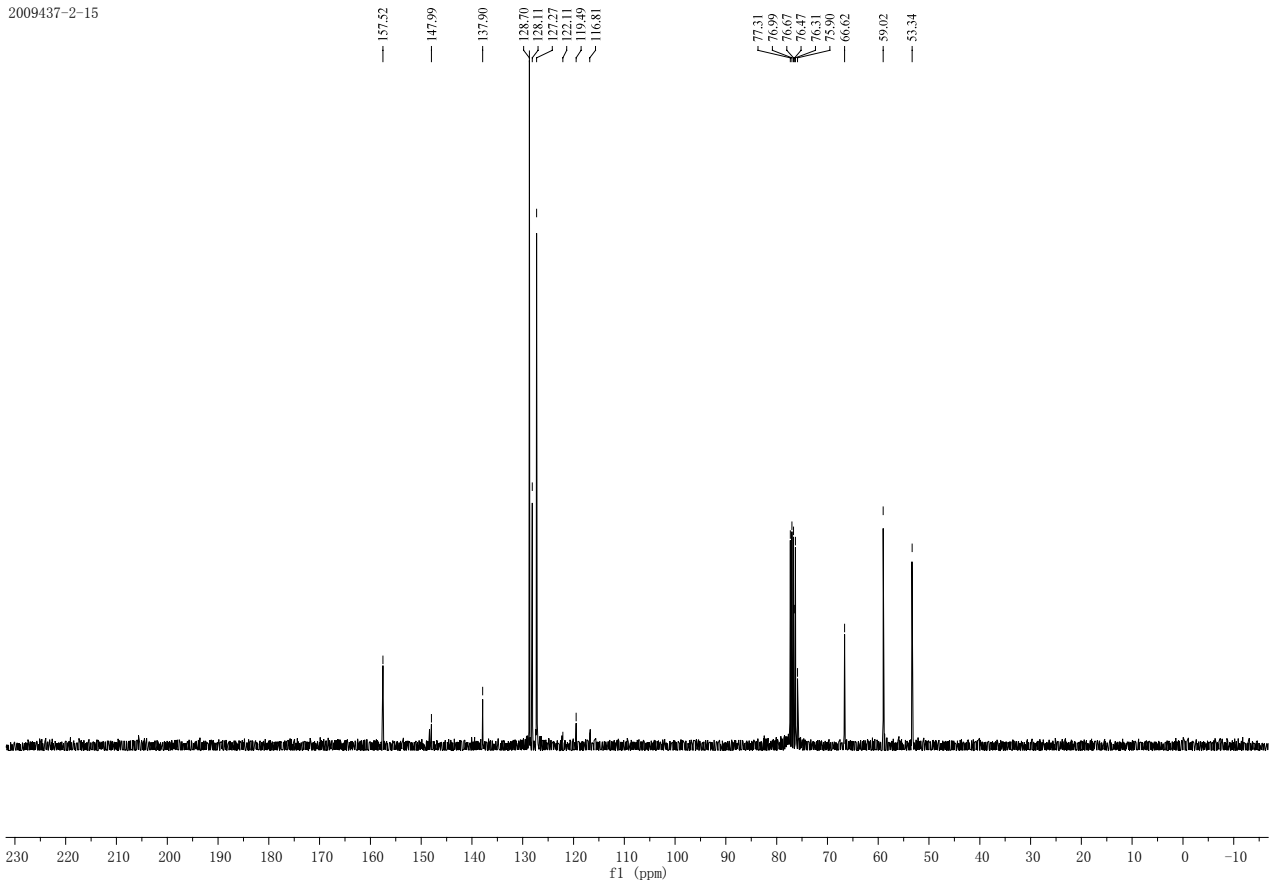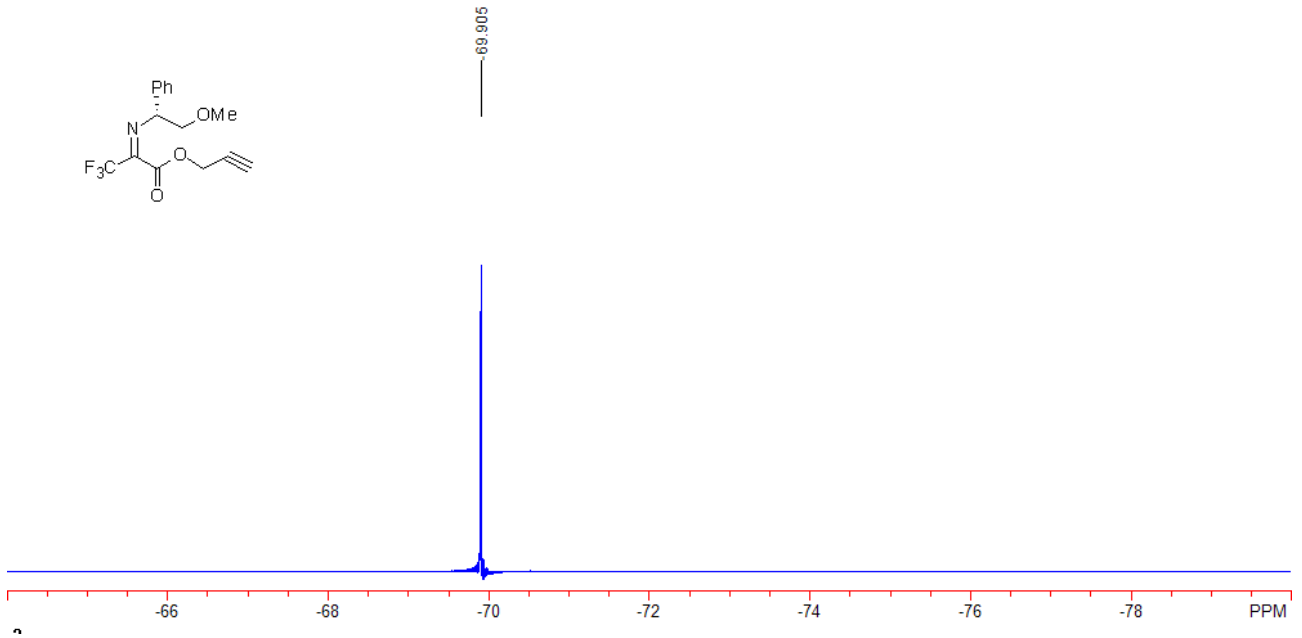

**(R)-benzyl 3,3,3-trifluoro-2-(2-methoxy-1-phenylethylimino)propanoate (1e).**

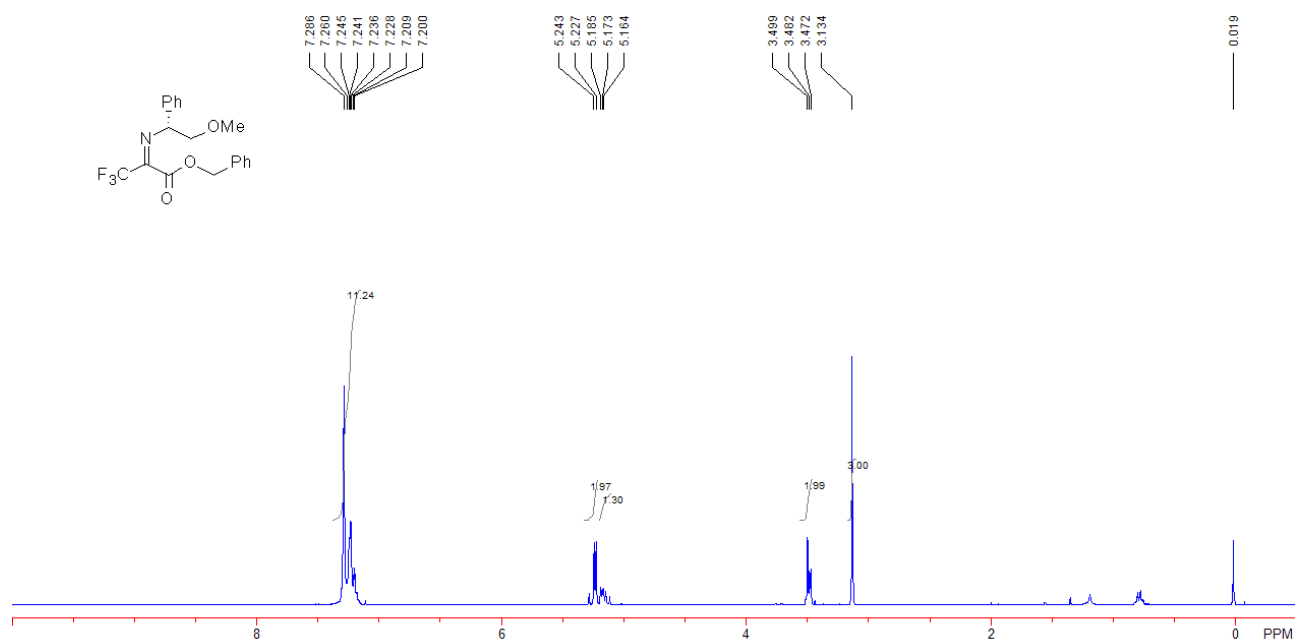

2009437-1-74-1

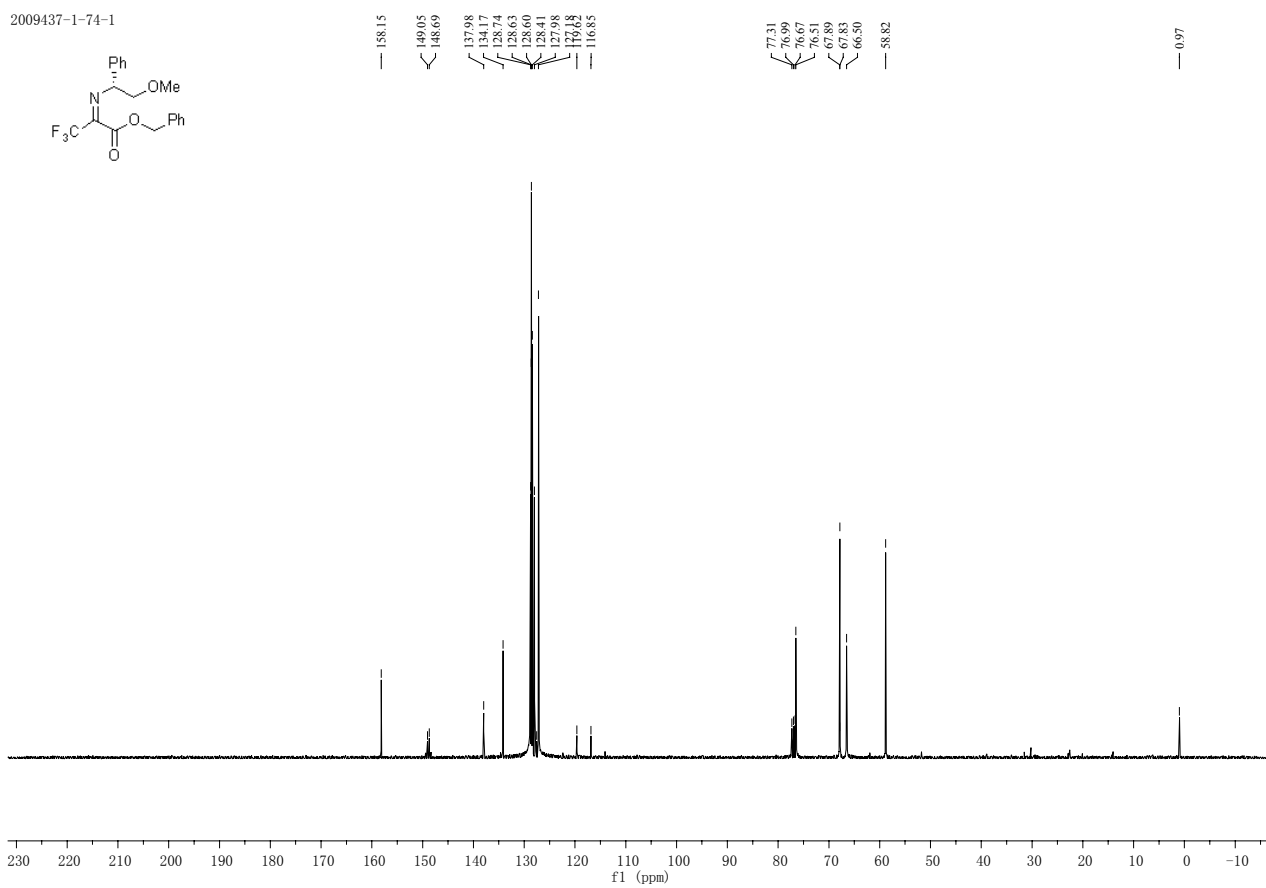



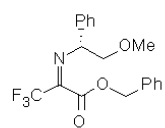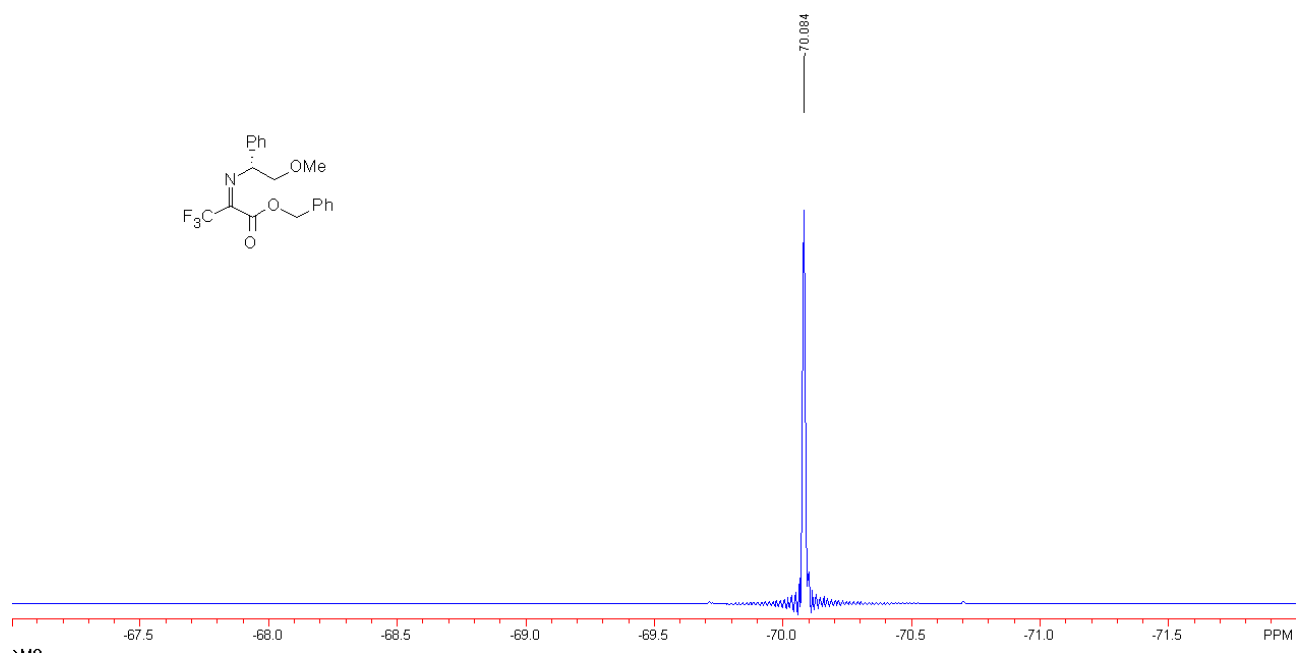

**(R)-Ethyl 2-((R)-2-methoxy-1-phenylethylamino)-2-(trifluoromethyl)pent-4-enoate (3a).**

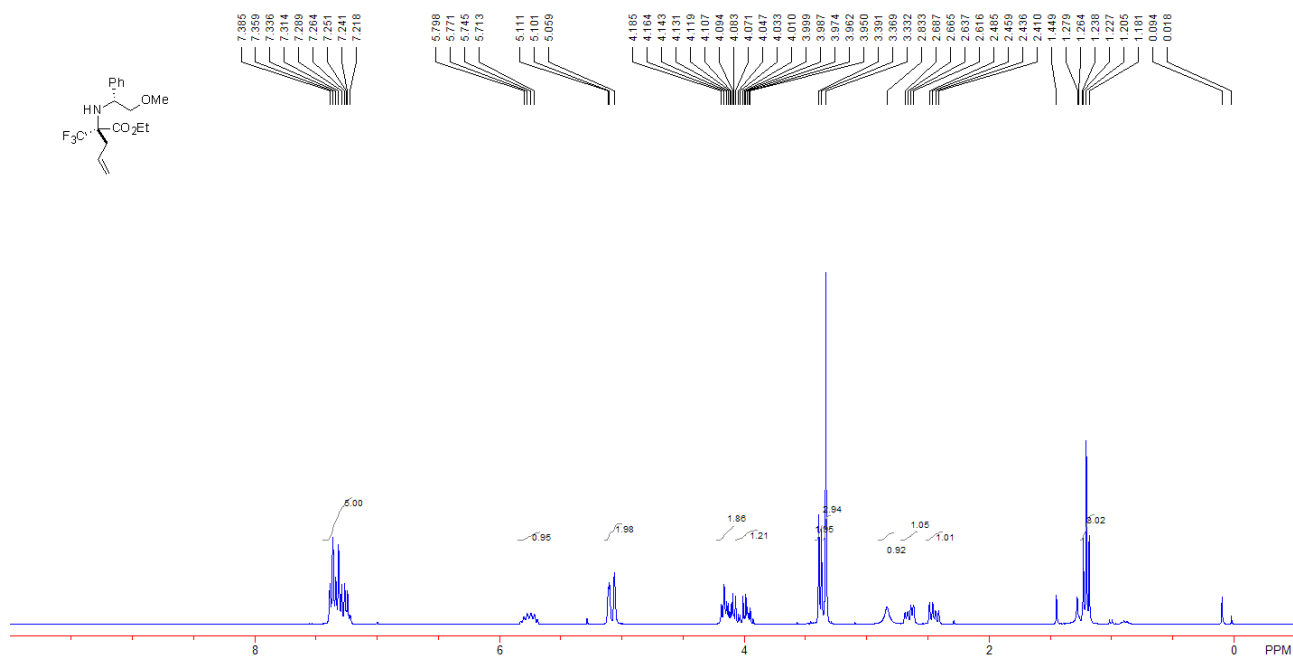

2009437-1-48-2H

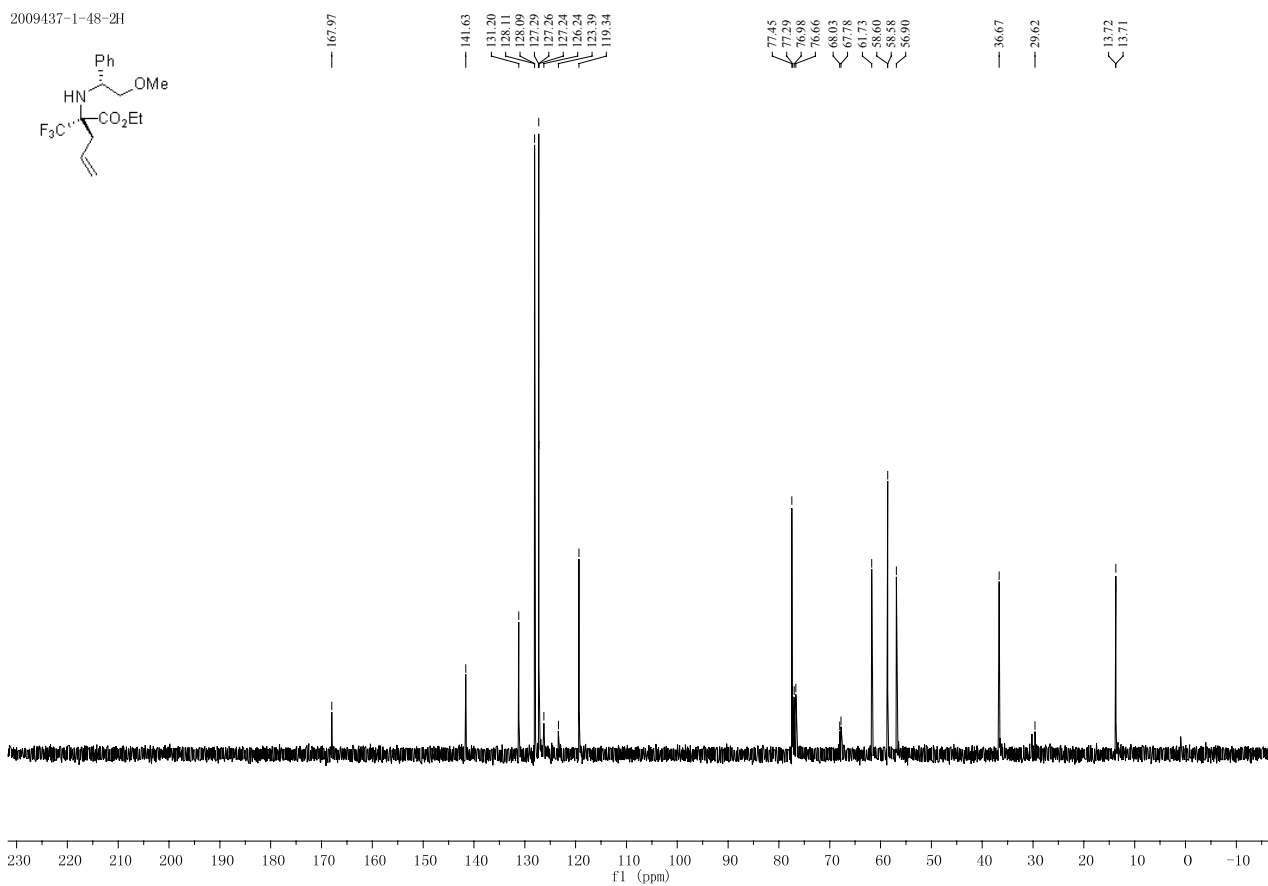

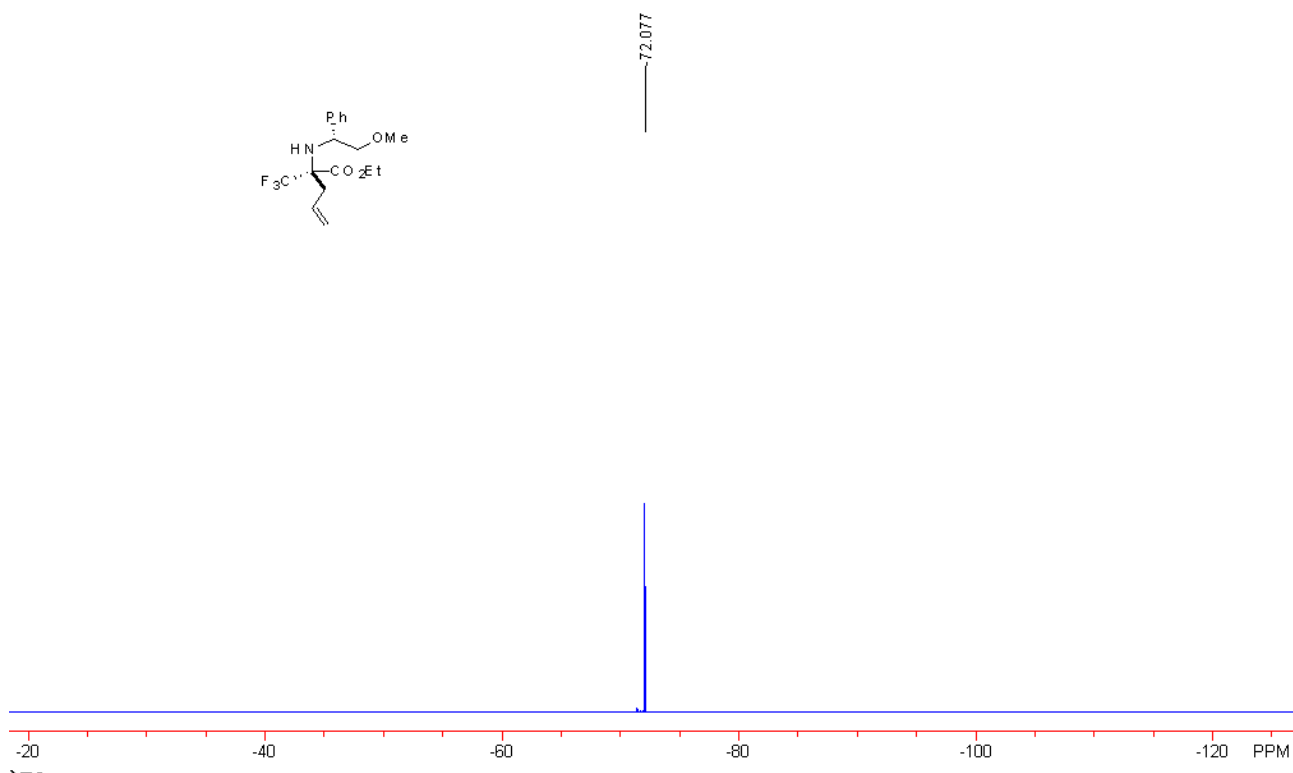

**(R)-2-(Trimethylsilyl)ethyl 2-((R)-2-methoxy-1-phenylethylamino)-2-(trifluoromethyl)pent-4-enoate (3b).**

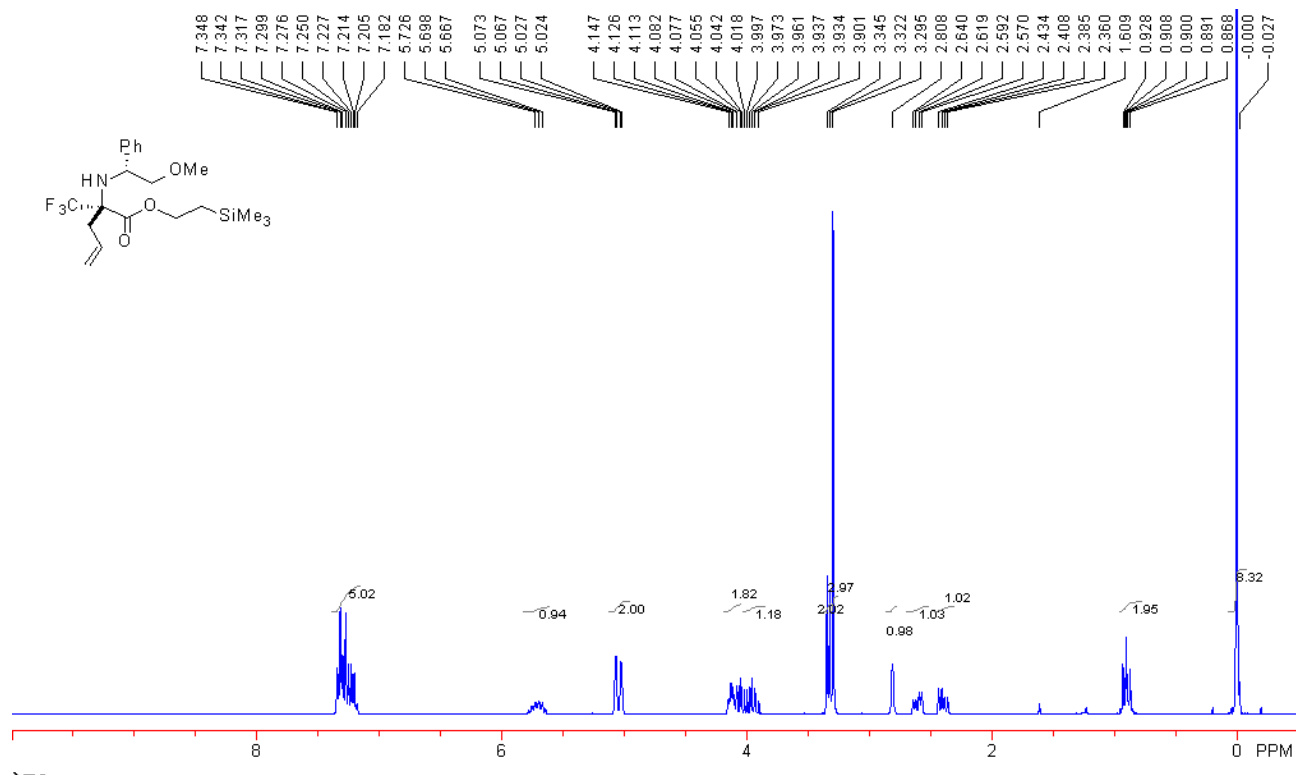

sk-2-66-c13

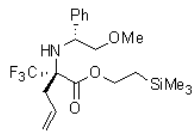

168.22

141.76

131.31

128.13

127.34

126.77

123.45

119.38

77.56

77.31

77.00

76.68

68.00

67.75

64.32

58.66

56.88

36.67

17.11

1.66

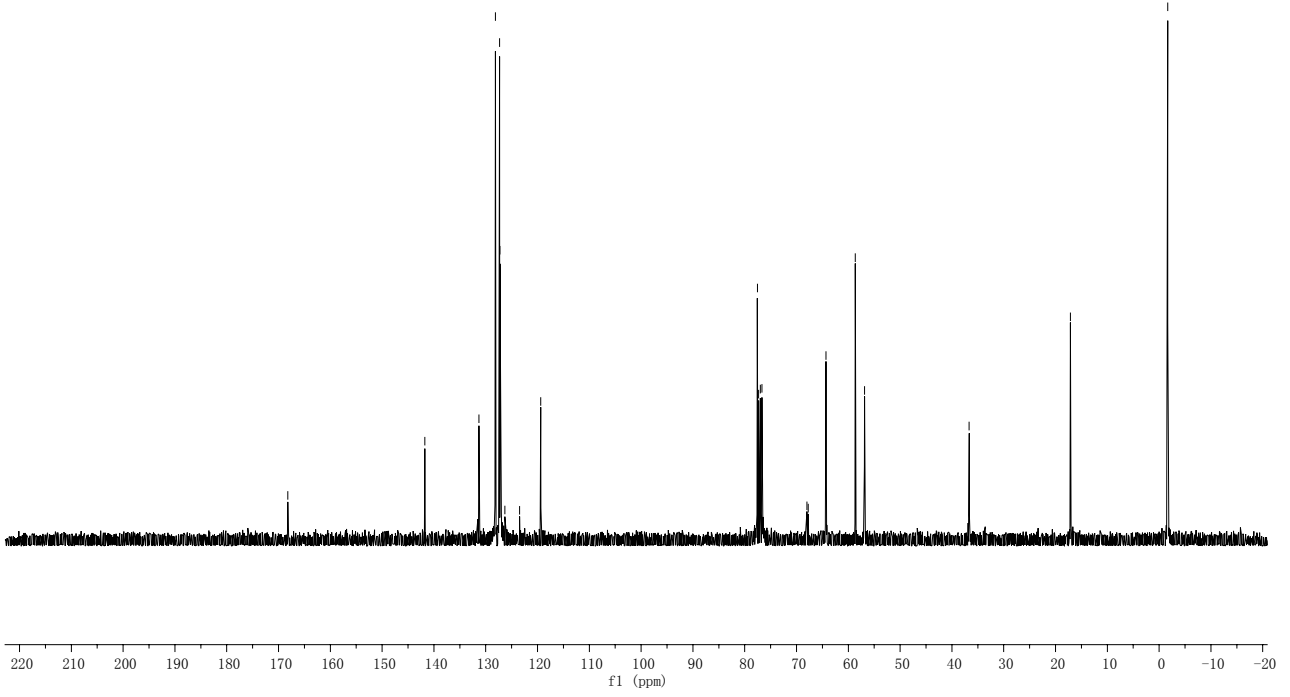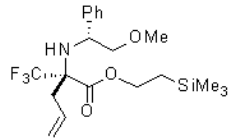

72.148

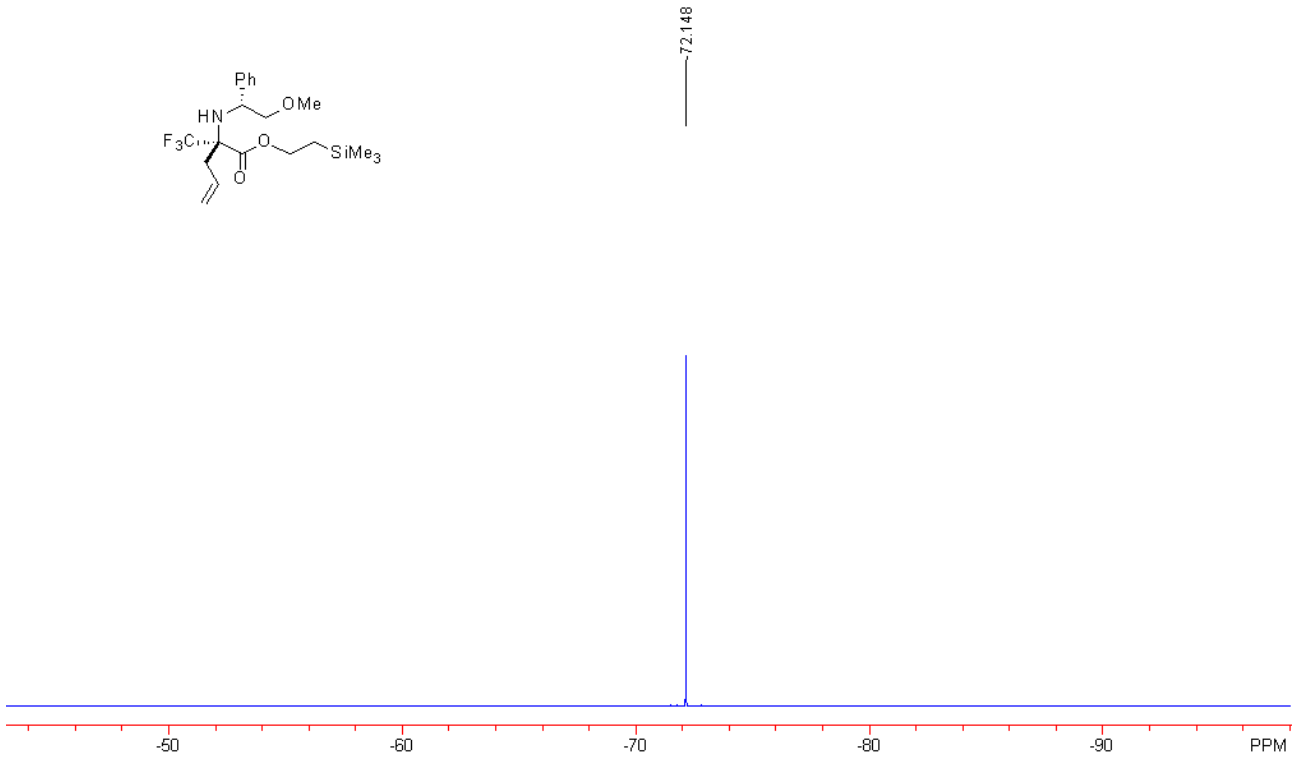

**(R)-Allyl 2-((R)-2-methoxy-1-phenylethylamino)-2-(trifluoromethyl)pent-4-enoate (3c).**

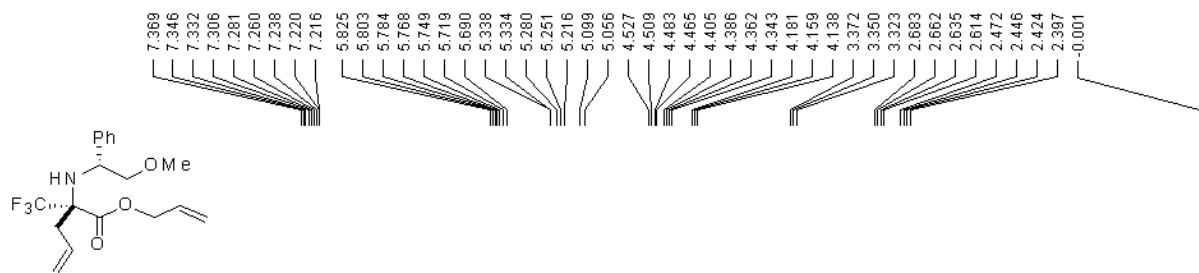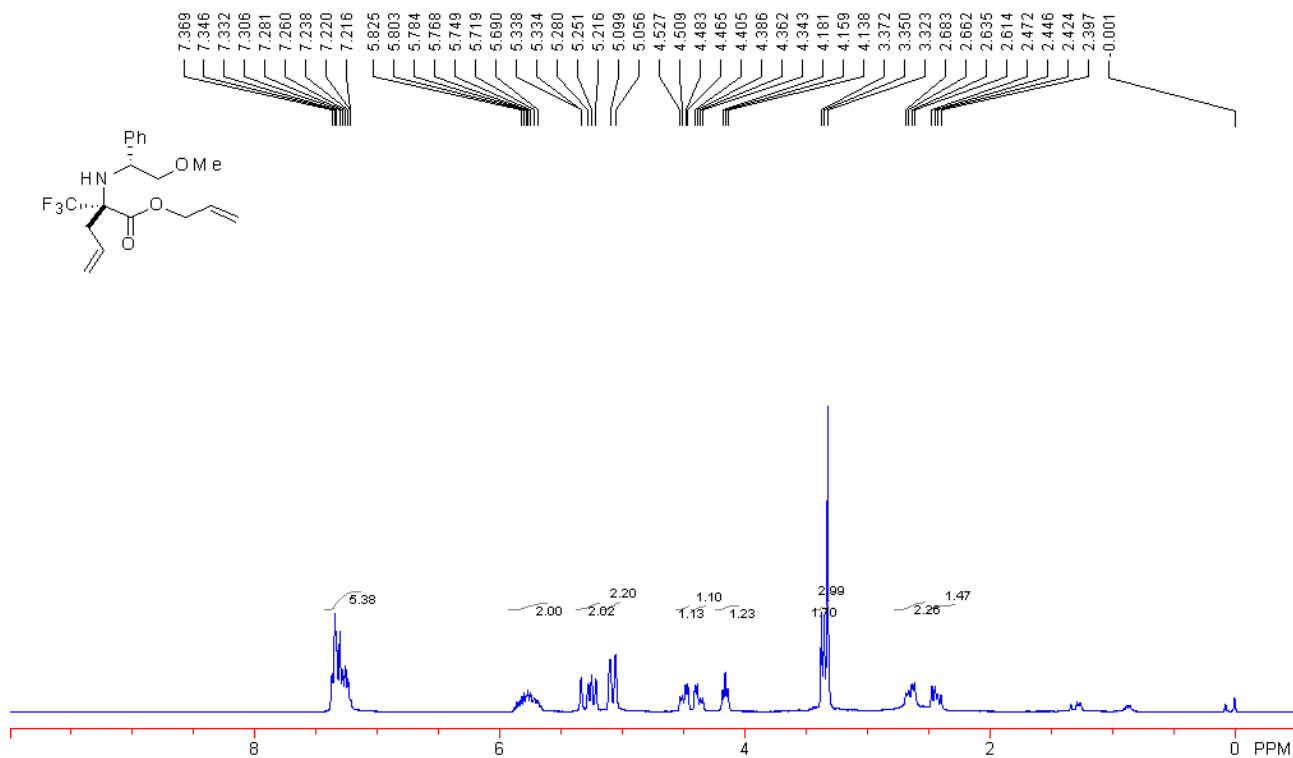

2009467-2-C(3c)  
200947-2

167.74, 141.41, 131.13, 131.06, 128.18, 127.35, 126.69, 122.88, 119.65, 118.70, 77.41, 77.00, 76.58, 68.16, 67.82, 66.25, 58.65, 56.91, 36.83

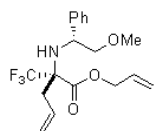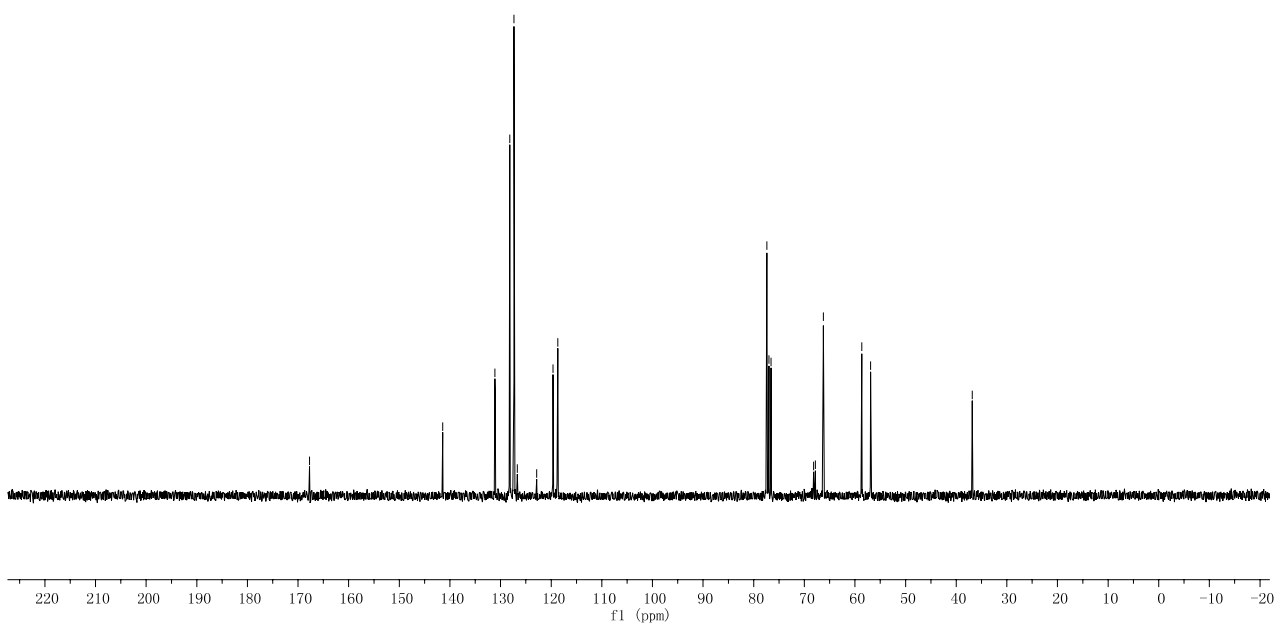

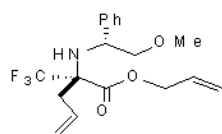

72.105

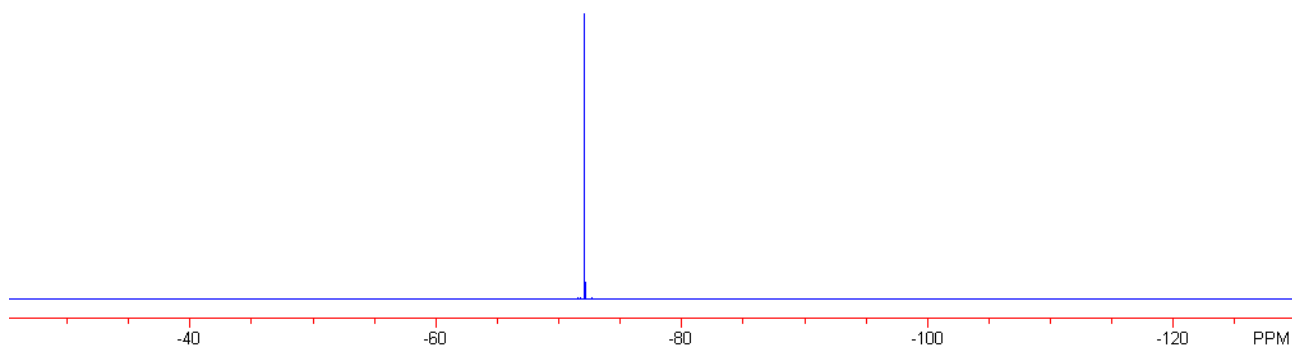

**(R)-Prop-2-ynyl 2-((R)-2-methoxy-1-phenylethylamino)-2-(trifluoromethyl)pent-4-enoate (3d).**

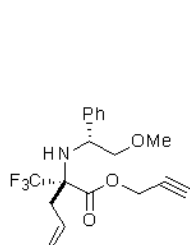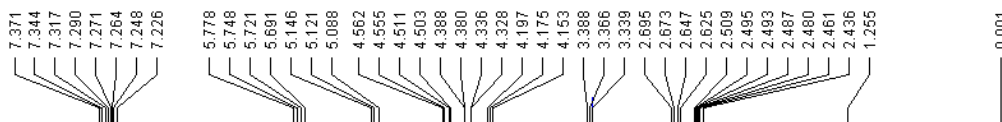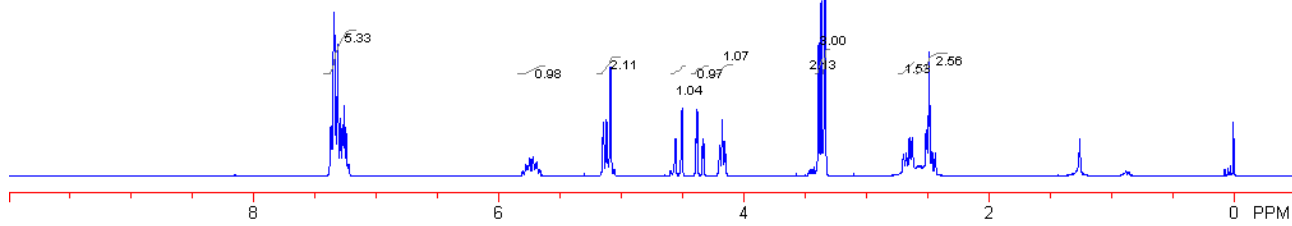

2009437-2-44

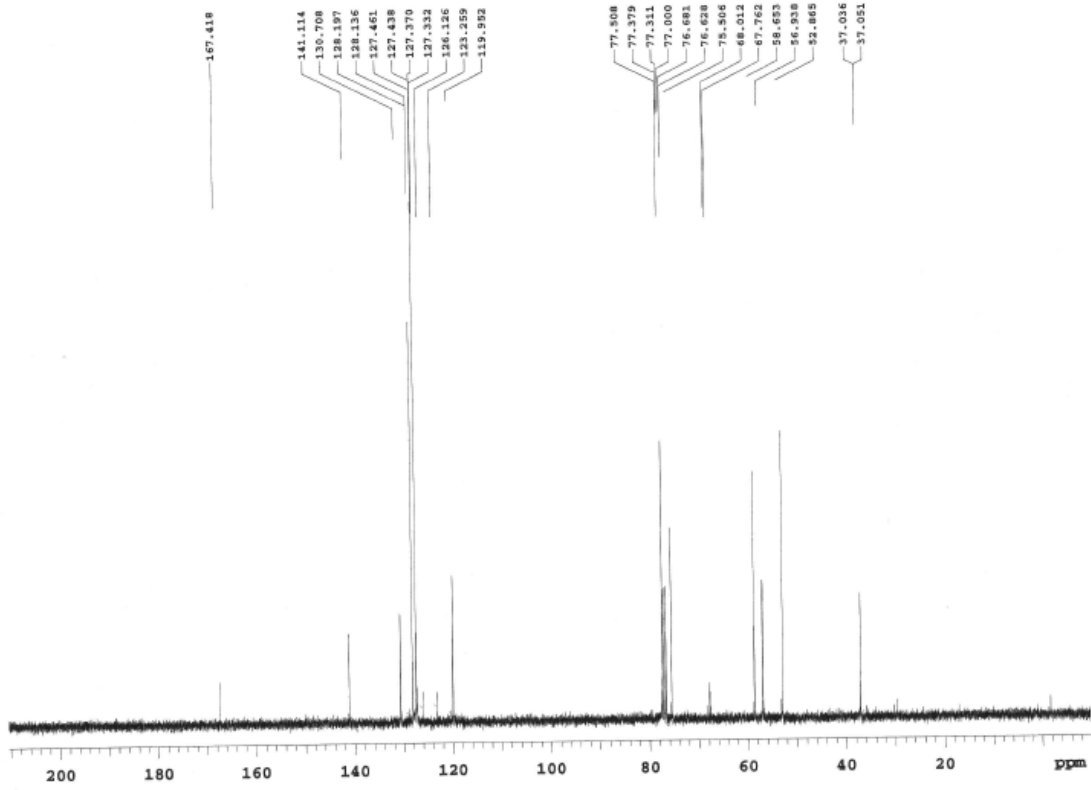

77.884

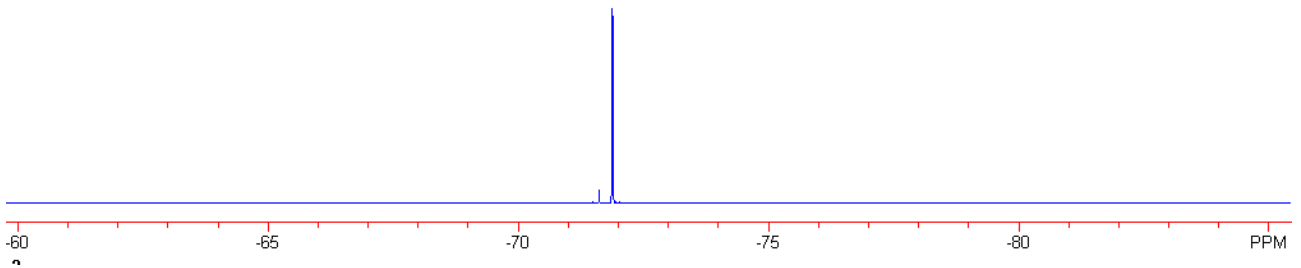

**(R)-Benzyl 2-((R)-2-methoxy-1-phenylethylamino)-2-(trifluoromethyl)pent-4-enoate (3e).**

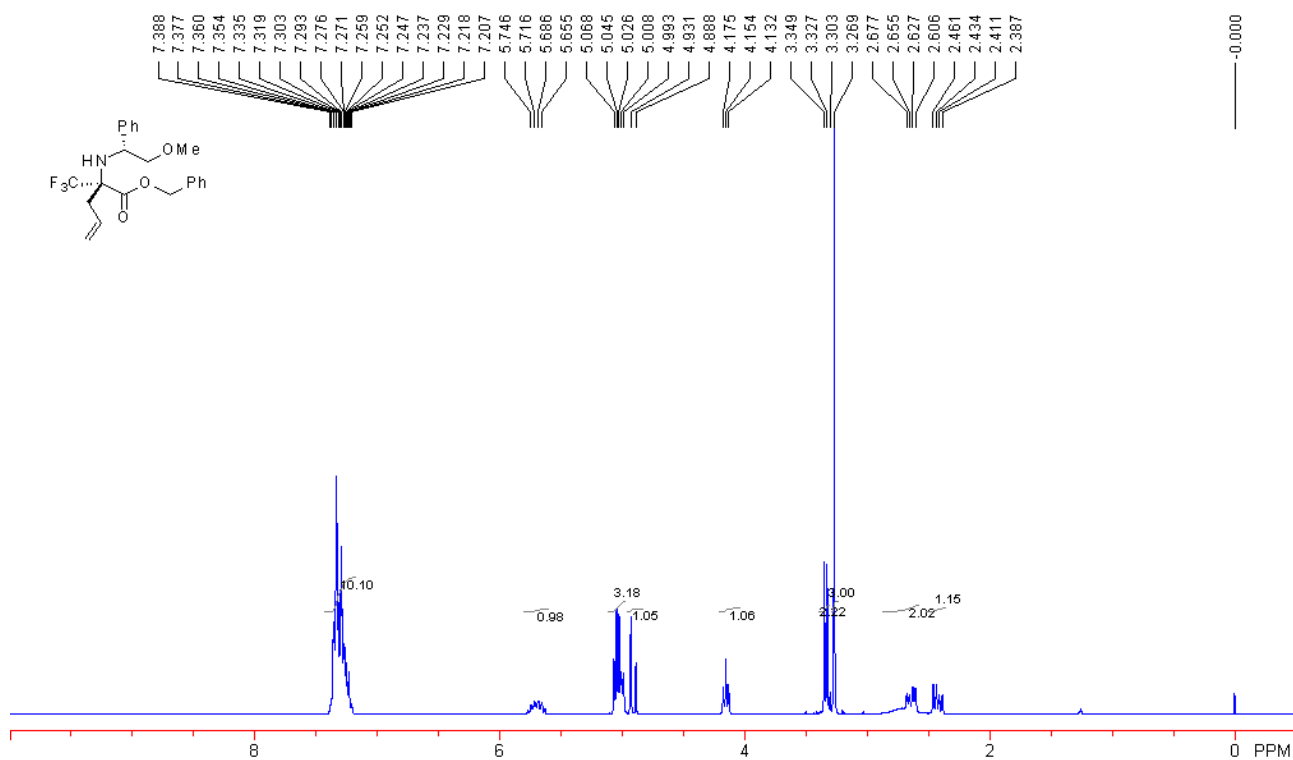

2009437-2-4-c (3e)  
2009437-2-4

167.91, 141.43, 134.87, 130.97, 128.45, 128.18, 127.71, 127.21, 126.68, 122.86, 119.61, 77.41, 77.36, 76.99, 76.57, 68.24, 67.90, 67.56, 58.61, 56.91, 36.78

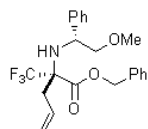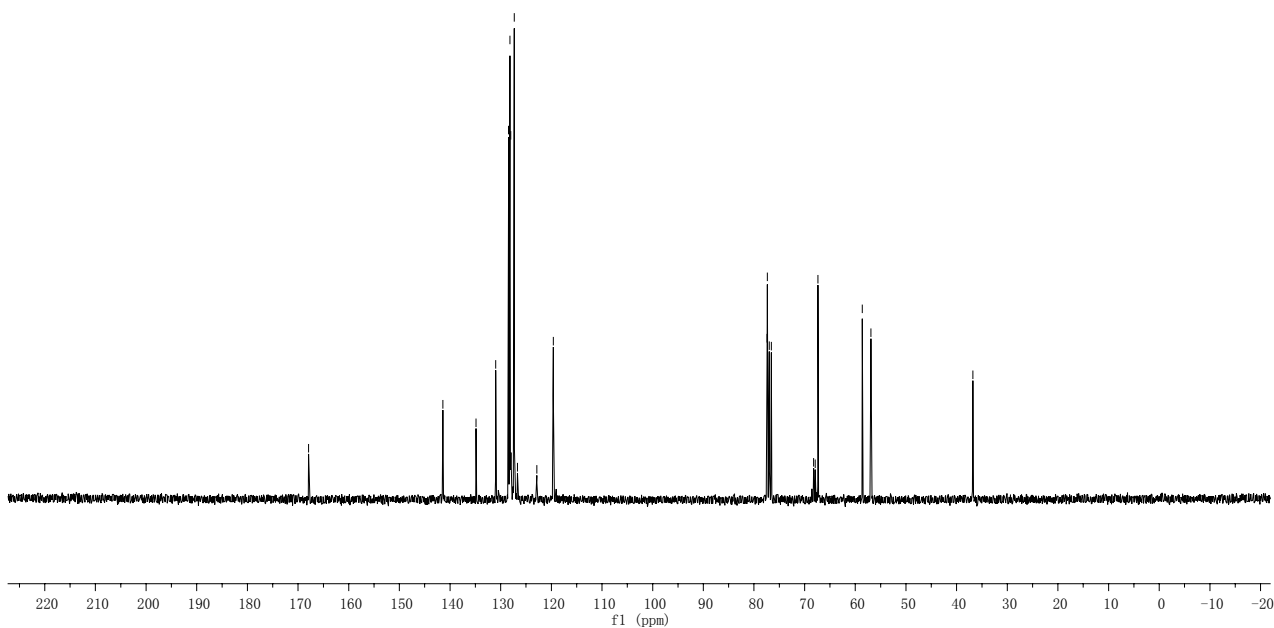



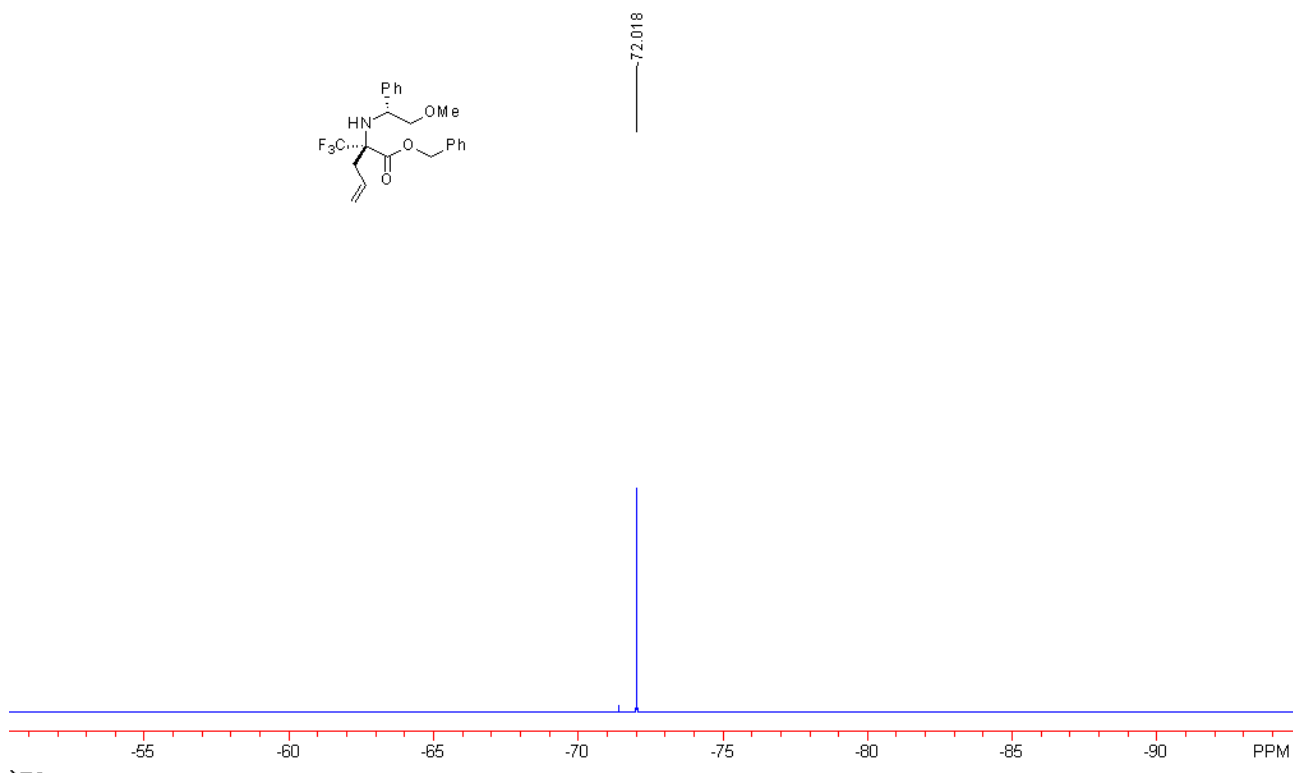

**(R)-Ethyl 2-((R)-2-methoxy-1-phenylethylamino)-4-methyl-2-(trifluoromethyl)pent-4-enoate (3f).**

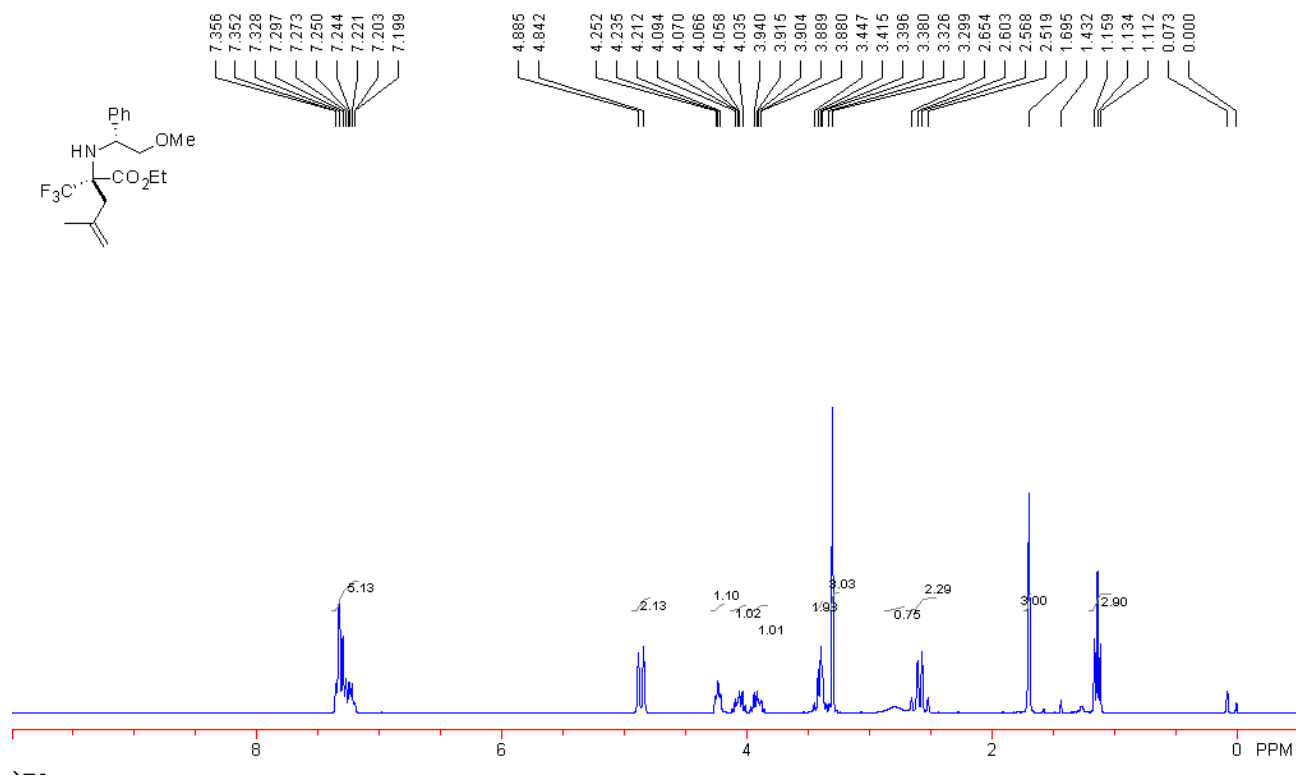

2009437-1-58-3C

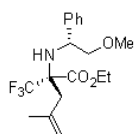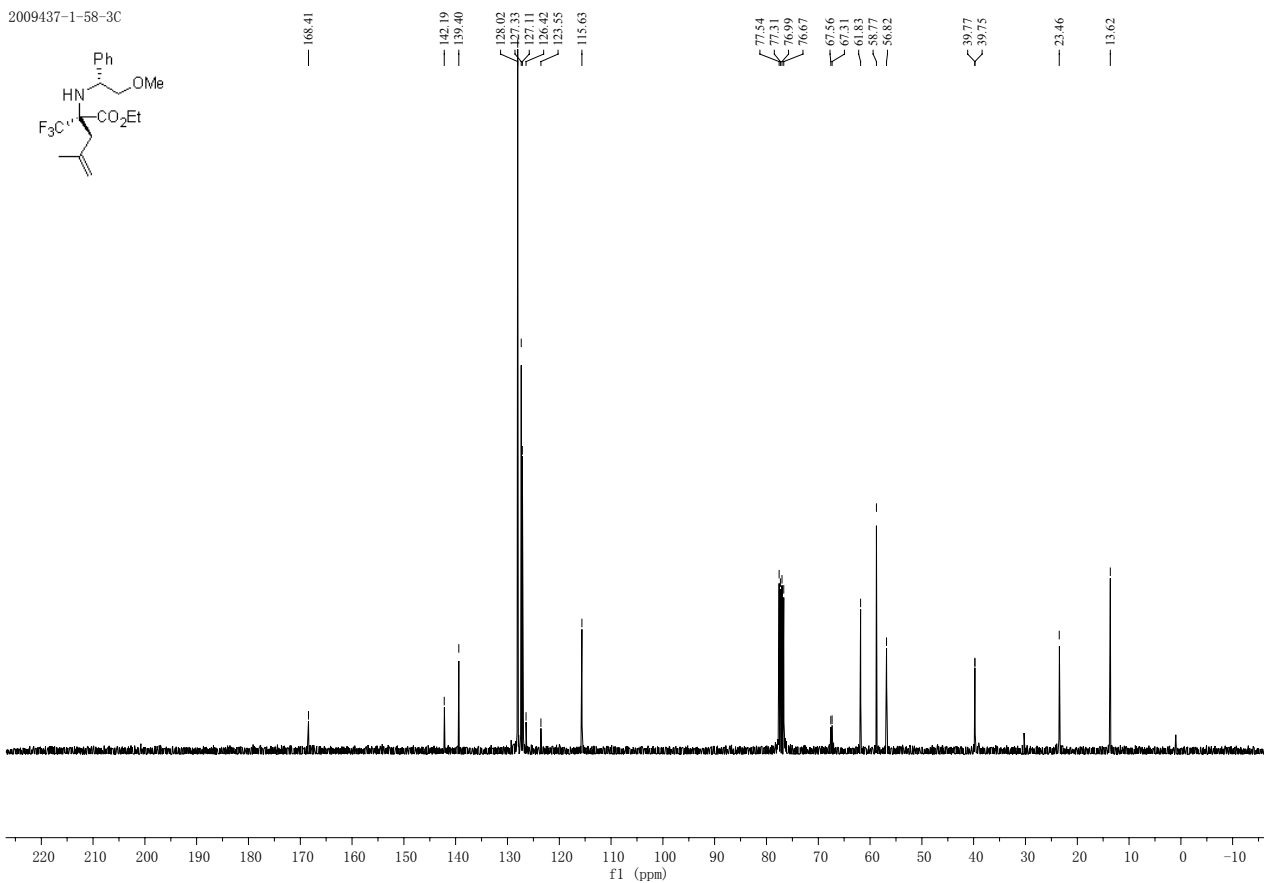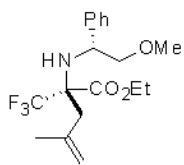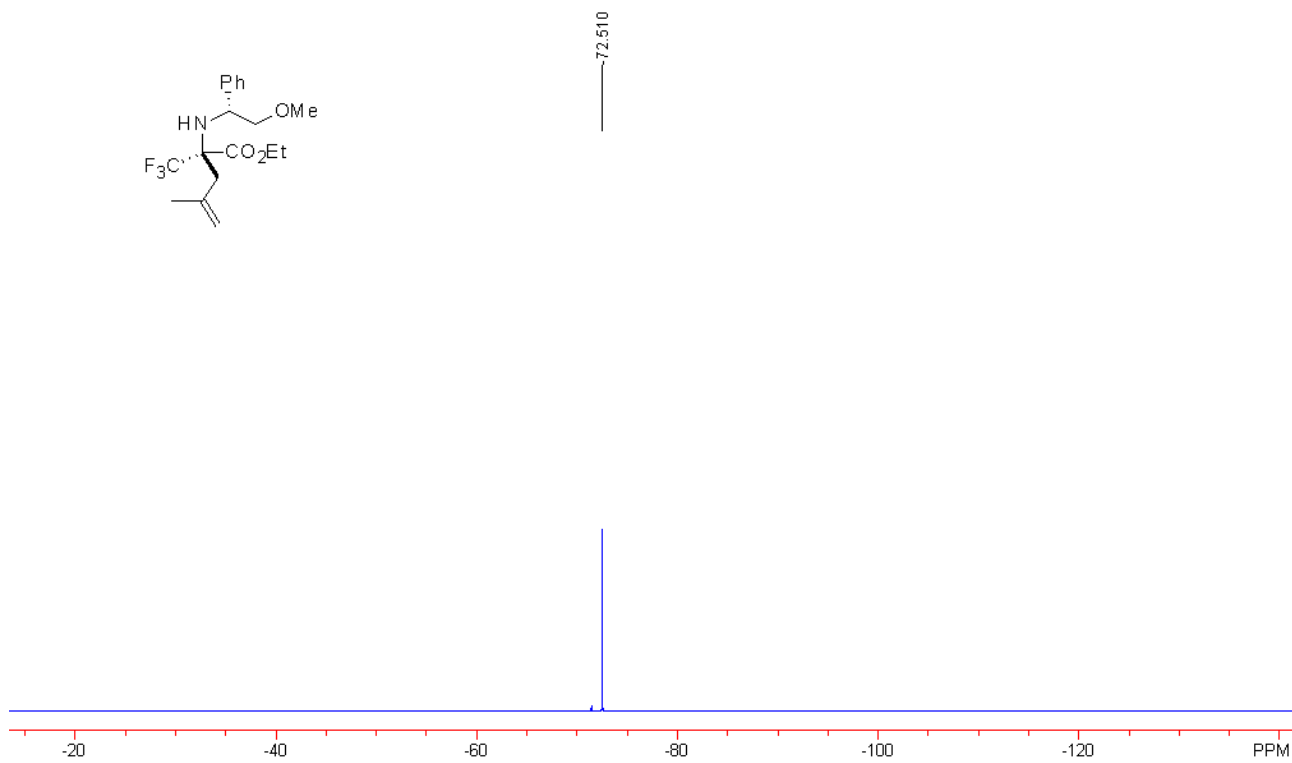

**(R)-2-(Trimethylsilyl)ethyl 2-((R)-2-methoxy-1-phenylethylamino)-4-methyl-2-(trifluoromethyl)pent-4-enoate (3g).**

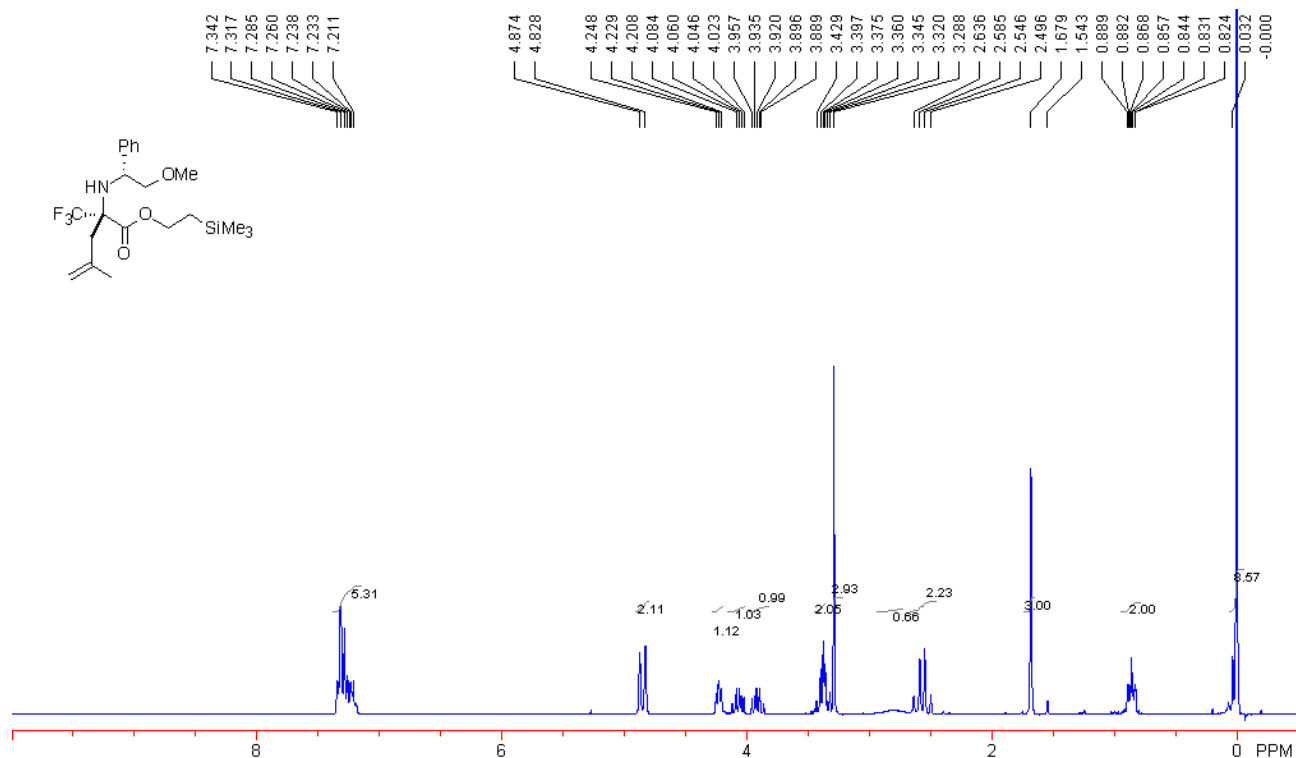

2009437-3-40-c (3g)  
2007437-3-40

- 168.54
- 142.15
- 139.41
- 128.00
- 127.79
- 127.34
- 127.09
- 126.87
- 125.66
- 115.49
- 77.52
- 77.41
- 76.99
- 76.56
- 67.47
- 64.35
- 64.37
- 58.23
- 56.71
- 39.54
- 23.51
- 16.88
- 1.70

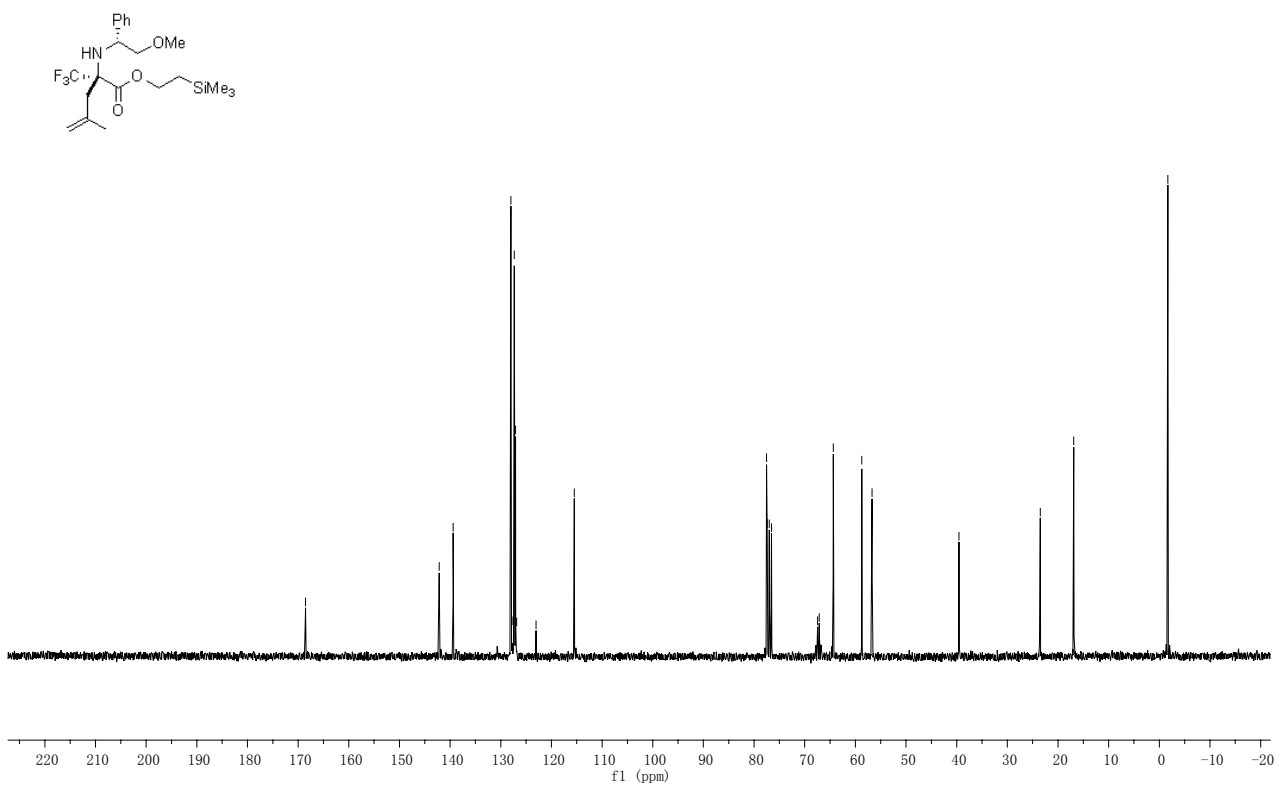

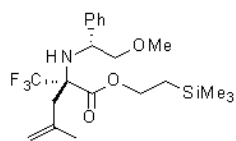

72.472

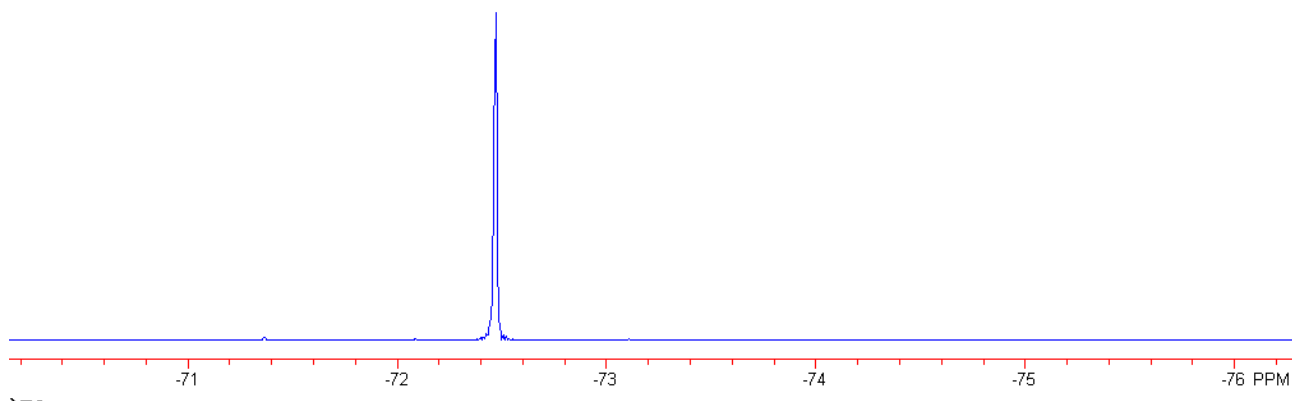

**(R)-Diethyl 2-((R)-2-methoxy-1-phenylethylamino)-4-methylene-2-(trifluoromethyl)pentane Dioate (3h).**

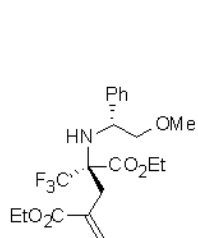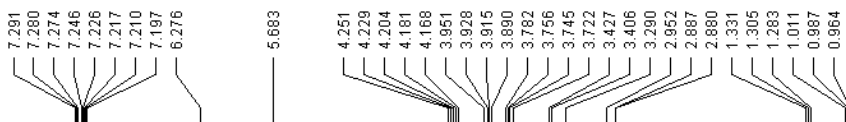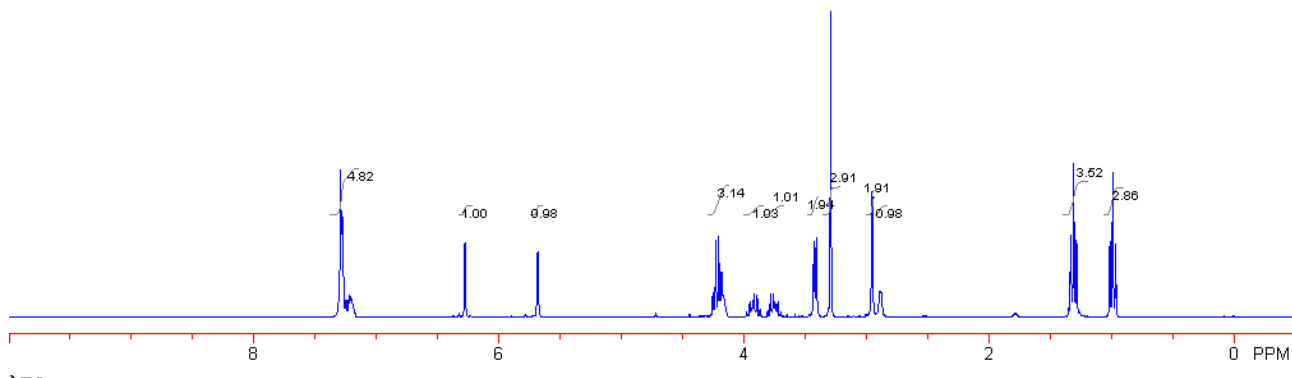

2009437-2-28  
Pulse Sequence: s2pul

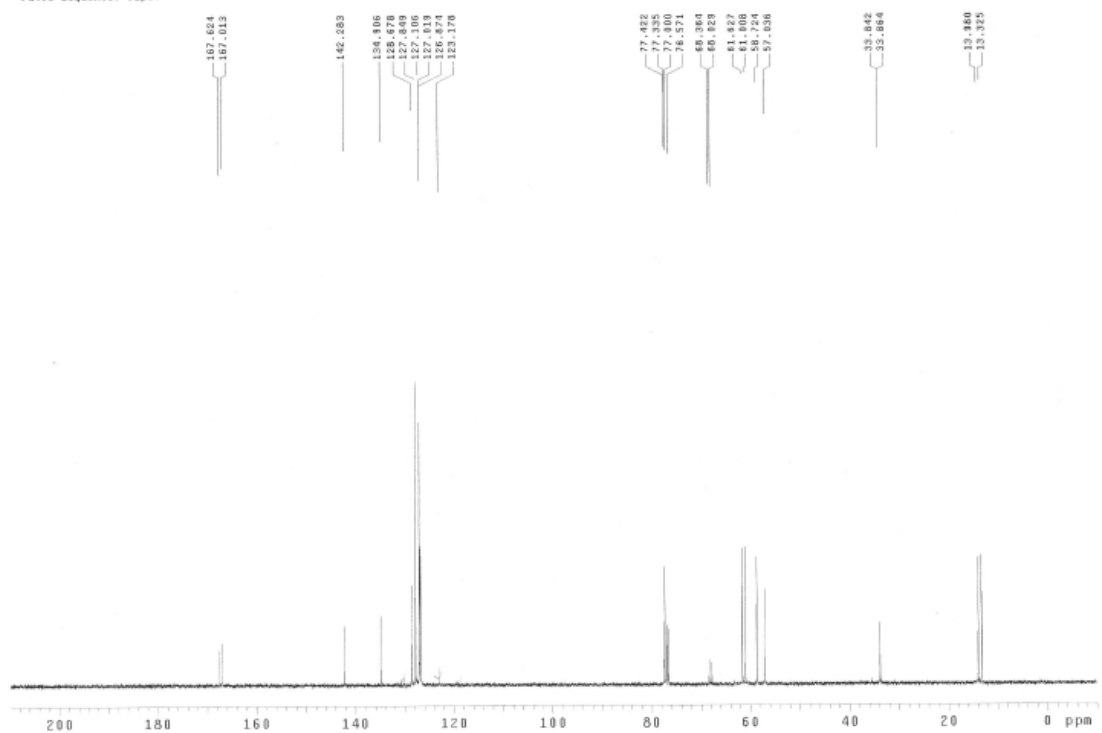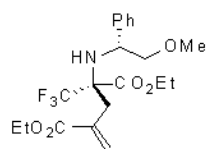

71.933

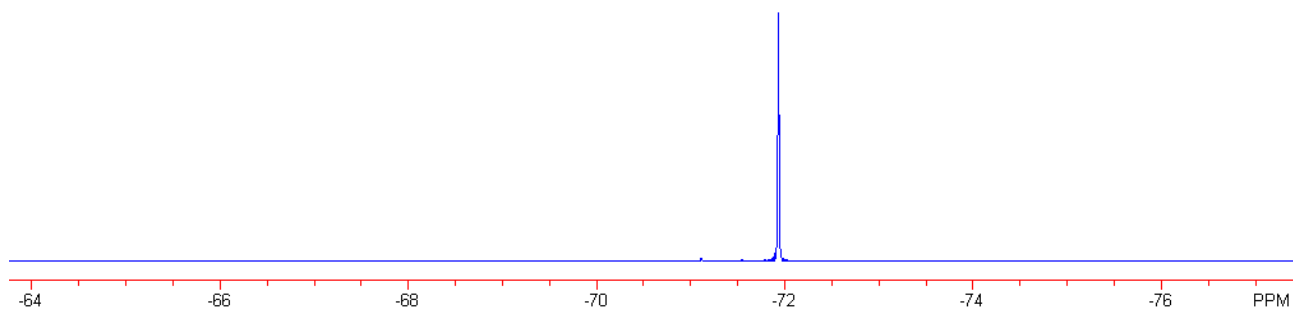

**(2*R*,3*S*)-Ethyl 2-((*R*)-2-methoxy-1-phenylethylamino)-3-methyl-2-(trifluoromethyl)pent-4-Enoate (3i).**

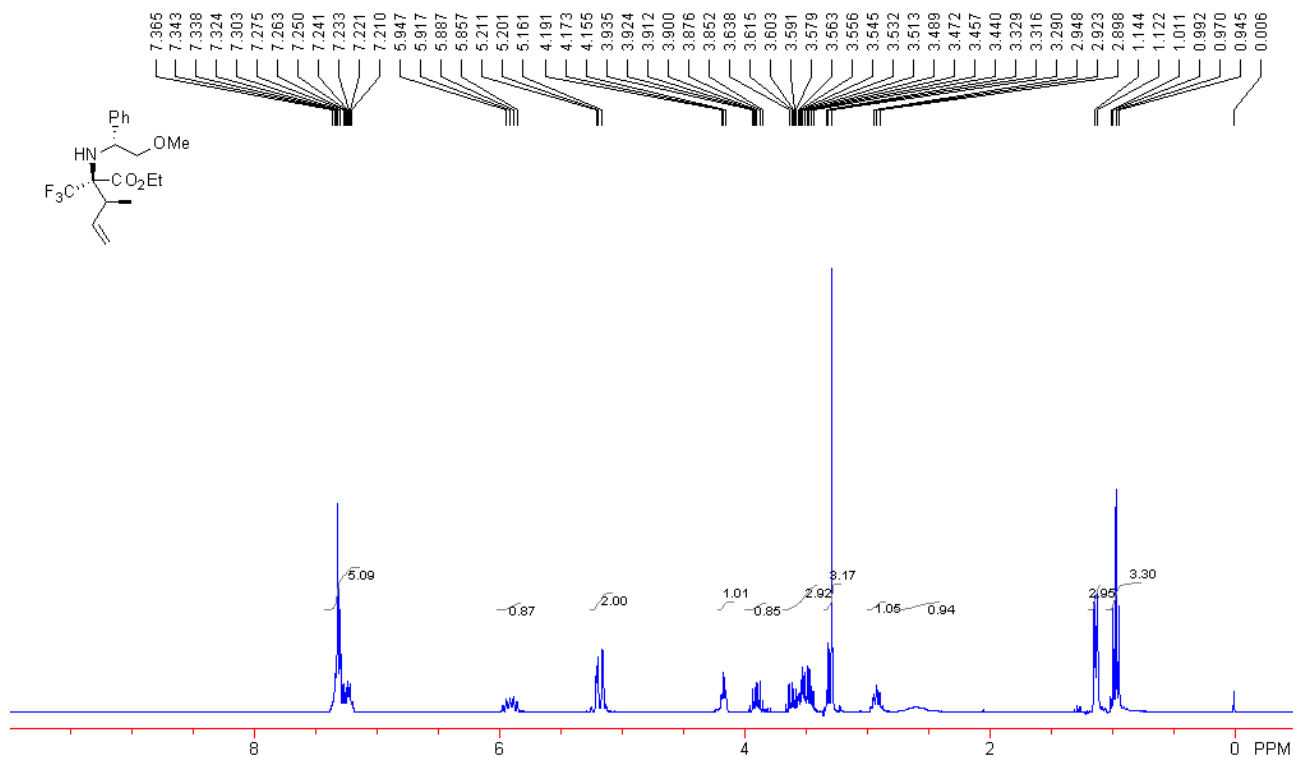

2009437-2-21

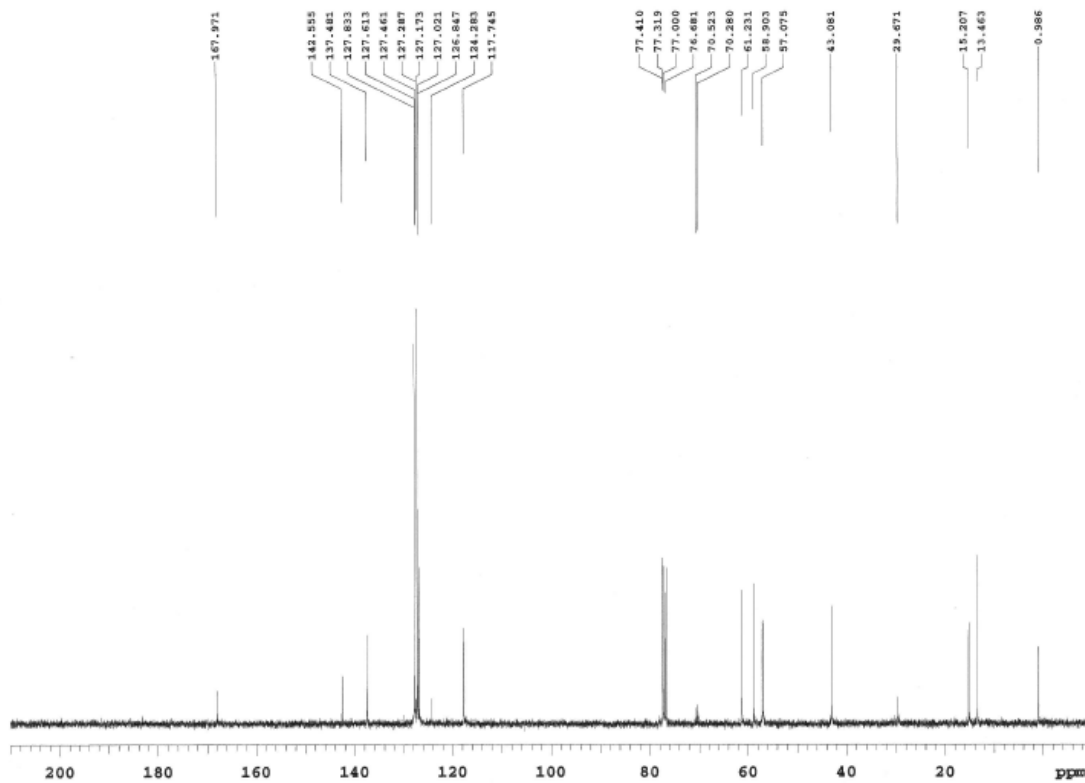

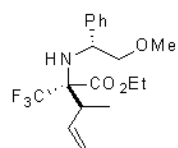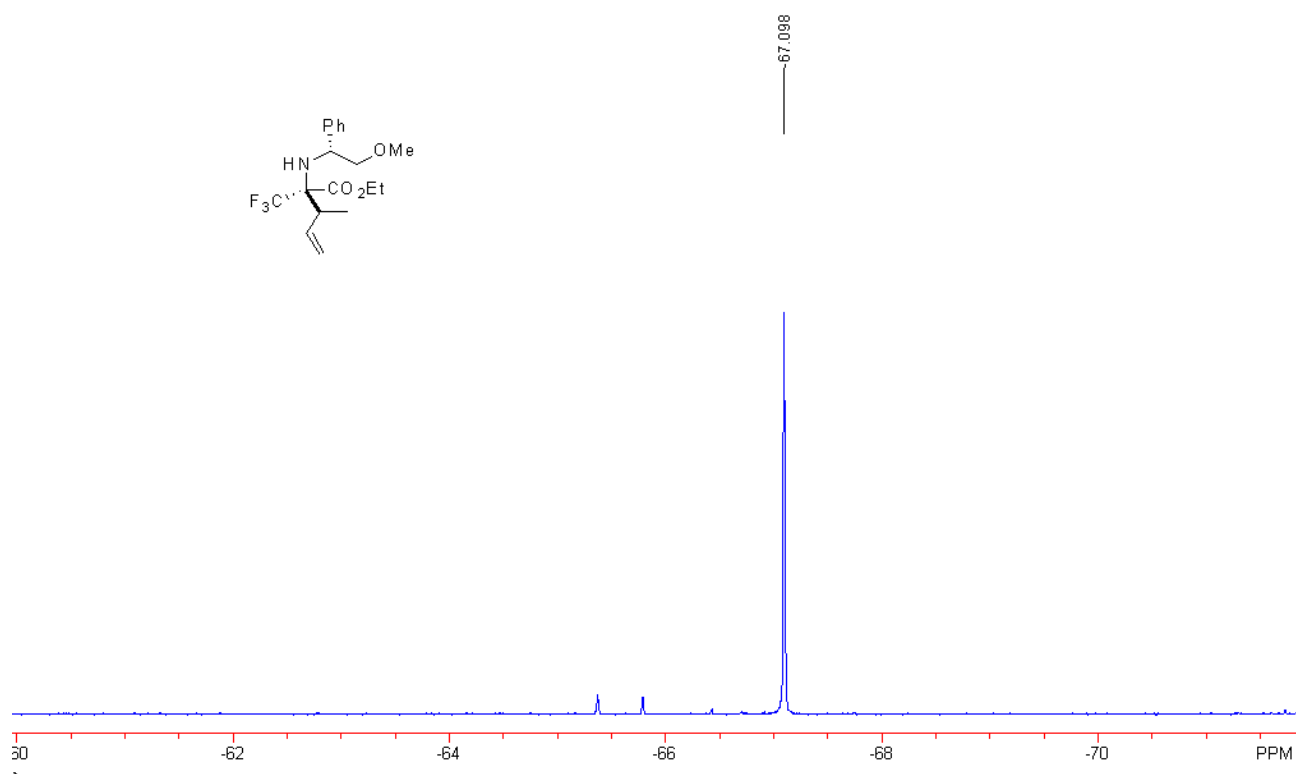

**(2*R*,3*R*)-Ethyl 2-((*R*)-2-methoxy-1-phenylethylamino)-3-phenyl-2-(trifluoromethyl)pent-4-enoate (3j).**

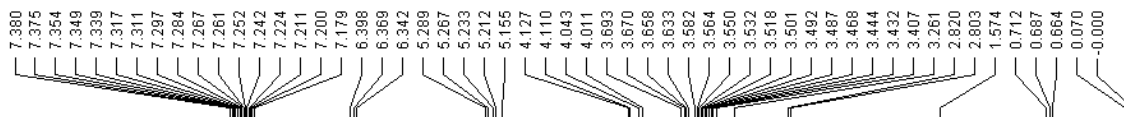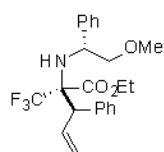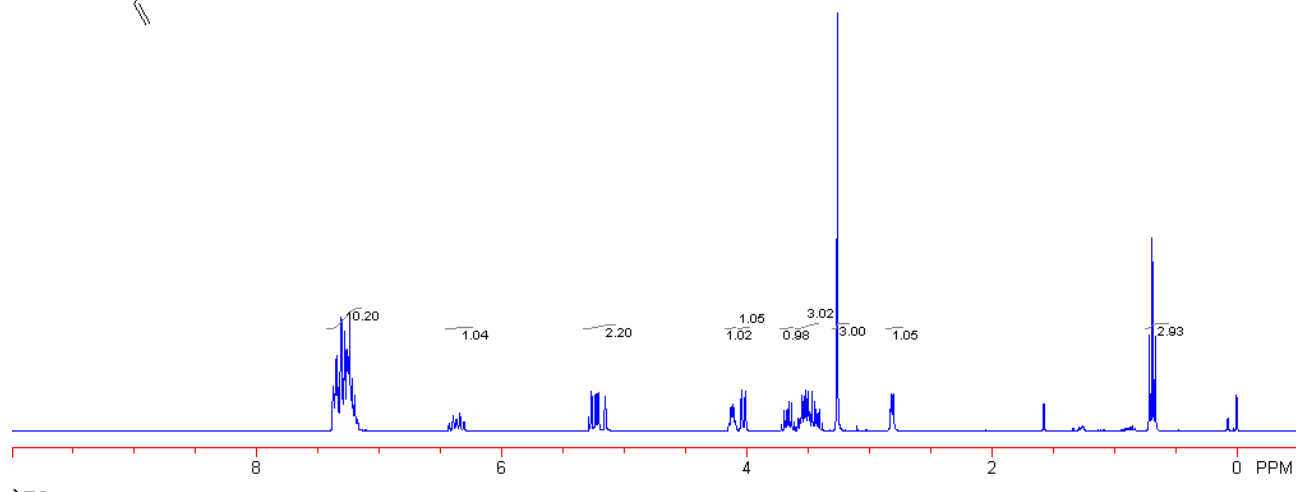

mpq-2-23

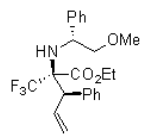

167.24

142.36  
137.28  
134.56  
129.40  
127.90  
127.55  
127.34  
127.12  
126.58  
126.58  
123.84  
119.46

77.16  
77.00  
76.84  
76.52  
71.80  
71.57  
61.08  
58.70  
57.22  
54.93

12.84

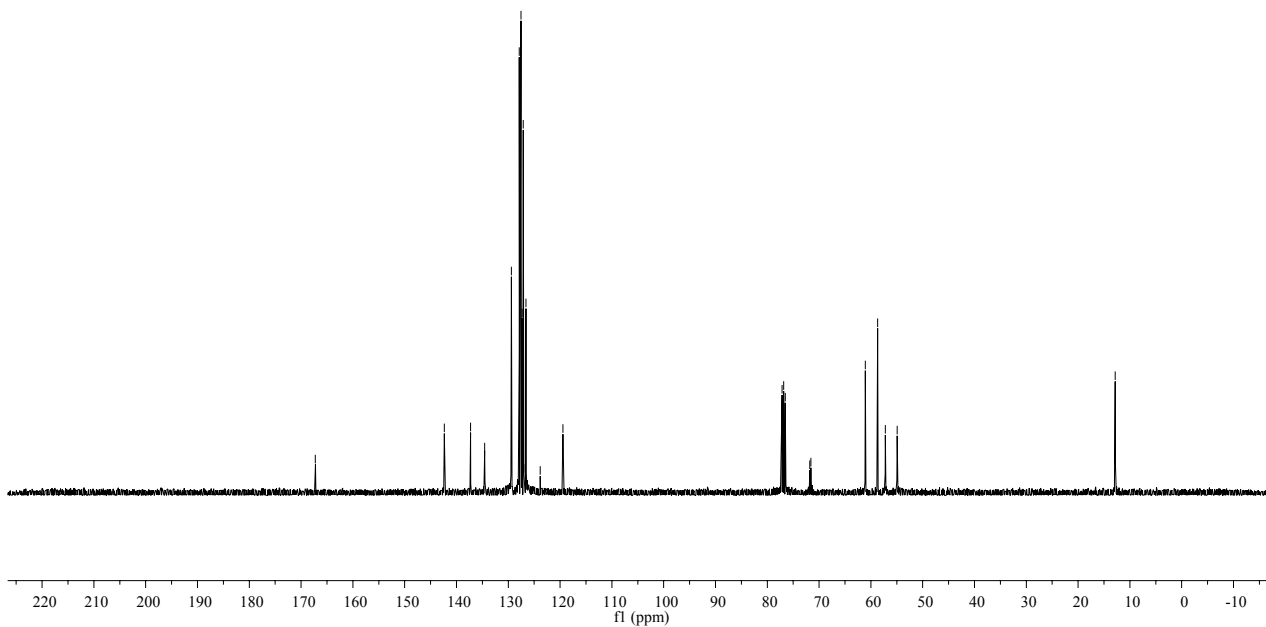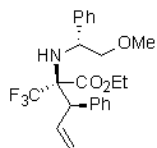

66.560

-30 -40 -50 -60 -70 -80 -90 PPM



**(2*R*,3*S*)-Diethyl 2-((*R*)-2-methoxy-1-phenylethylamino)-2-(trifluoromethyl)-3-vinylsuccinate**

**(3k).**

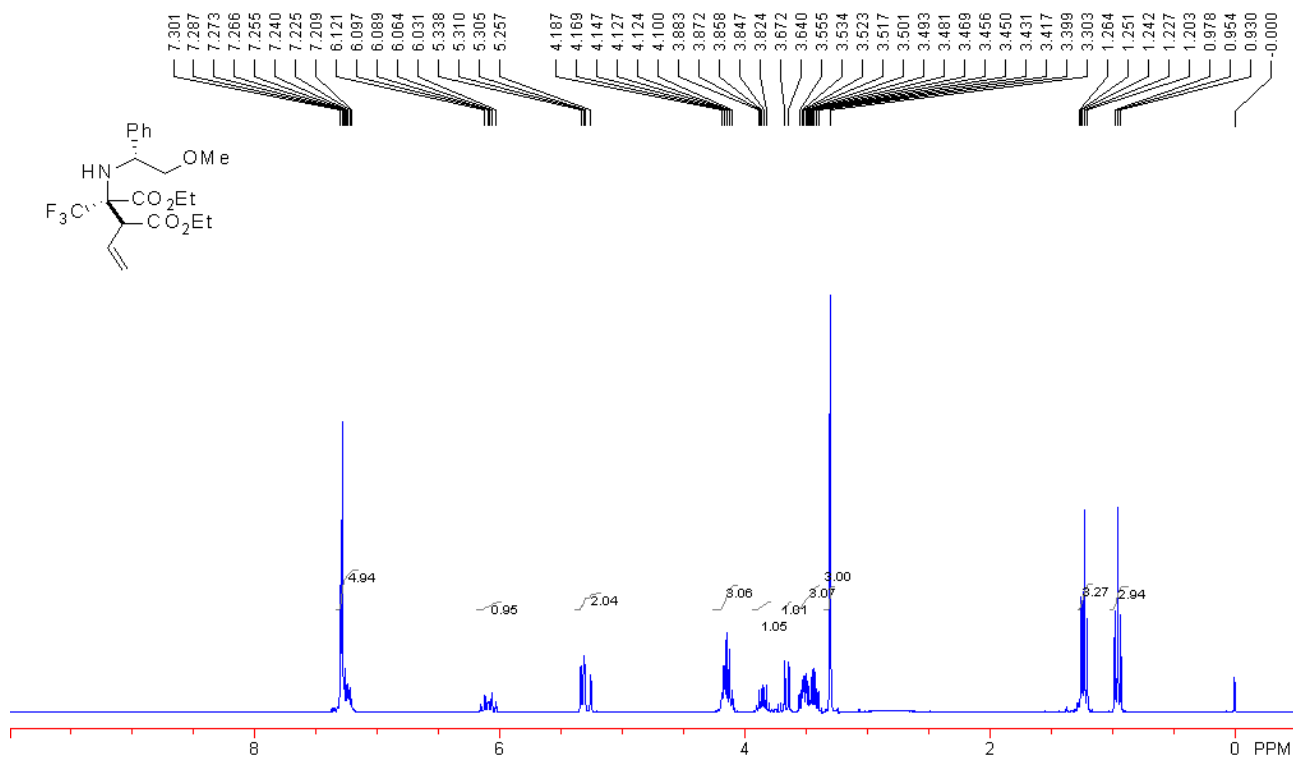

2009437-2-29

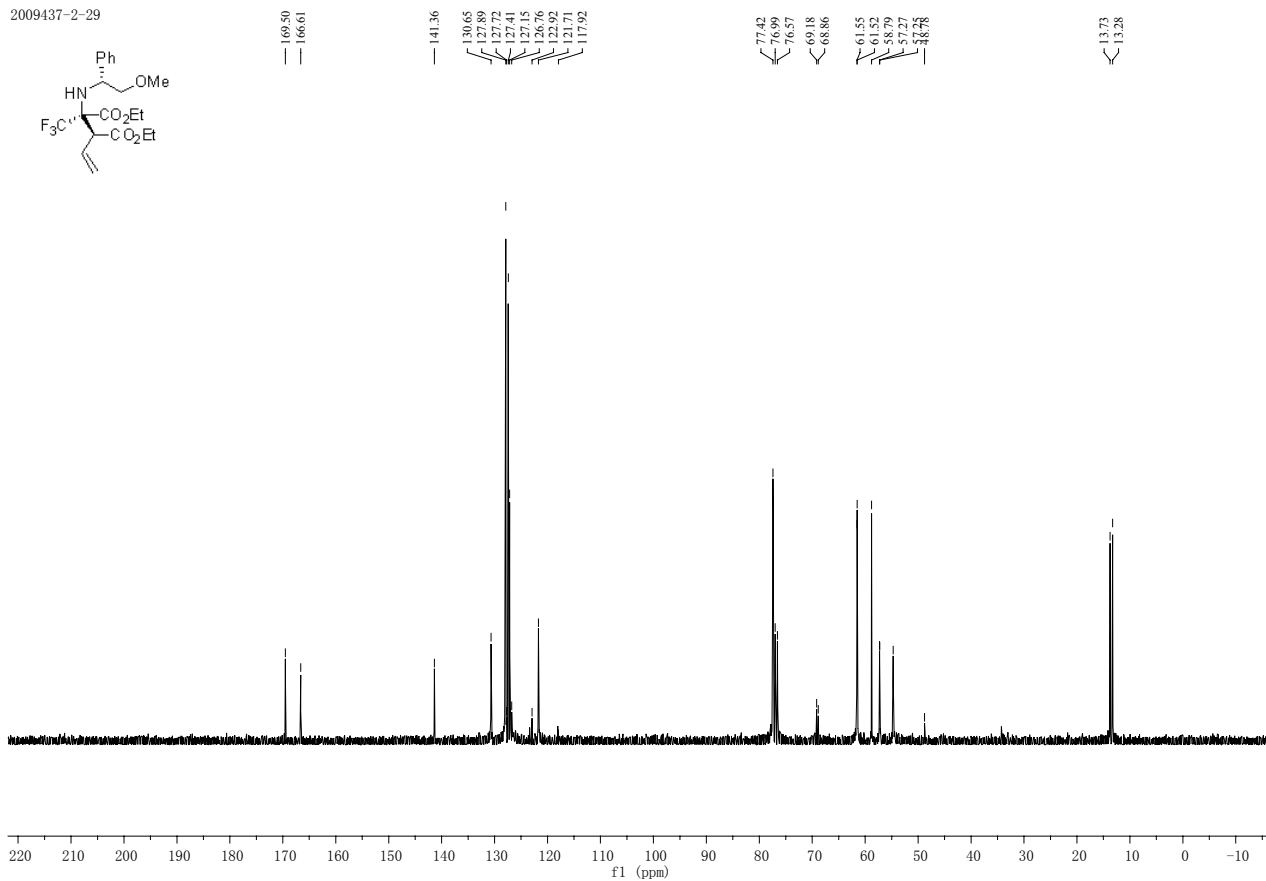

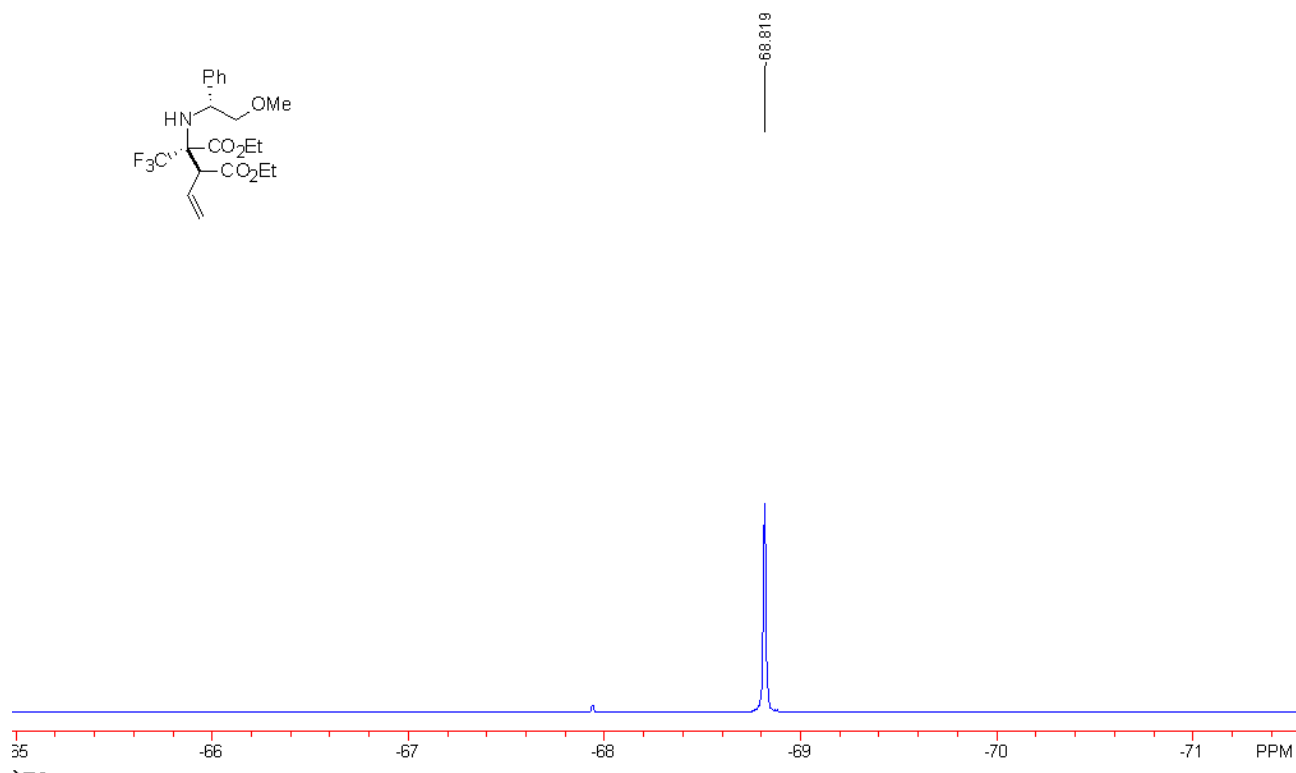

**(3*R*,5*R*)-3-allyl-5-phenyl-3-(trifluoromethyl)morpholin-2-one (4b).**

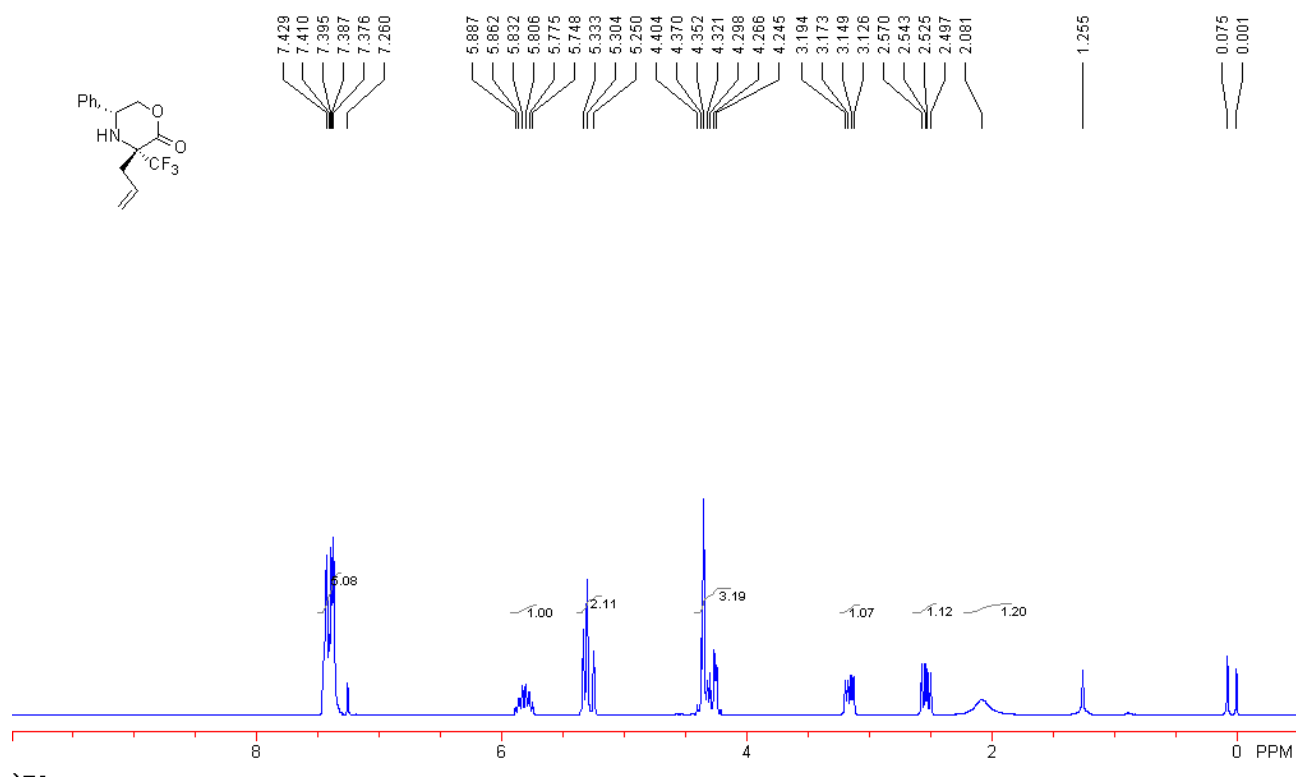

**(2R,3R)-ethyl**  
**-enoate (3j')**

**2-((R)-2-hydroxy-1-phenylethylamino)-3-phenyl-2-(trifluoromethyl)pent-4**

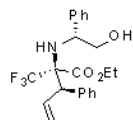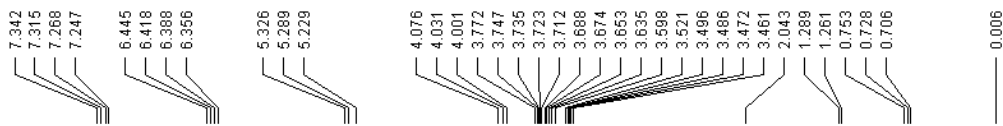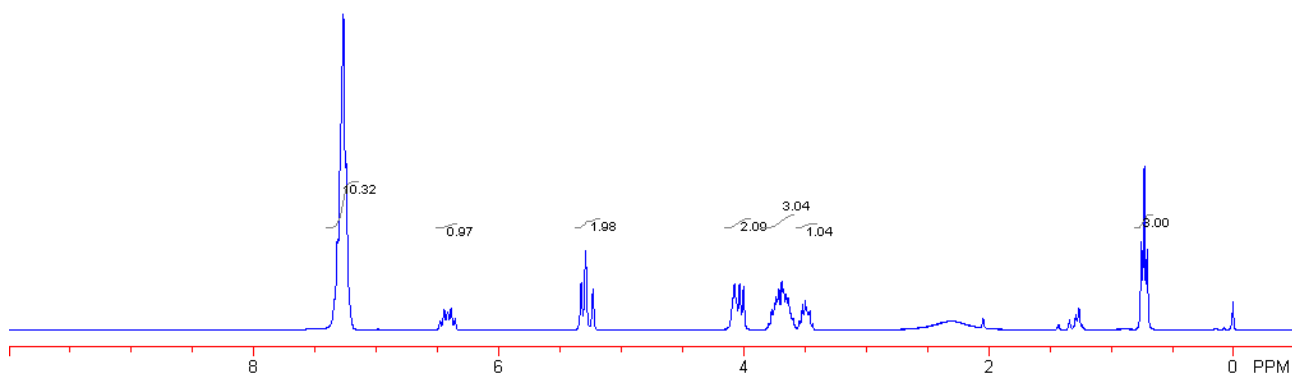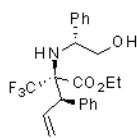

65.536

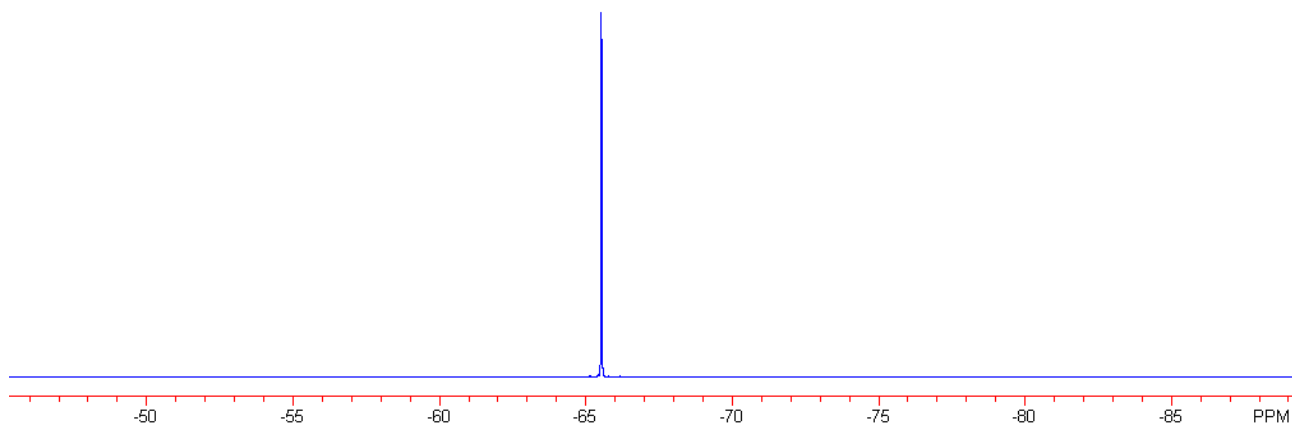

**(3*R*,5*R*)-5-phenyl-3-((*R*)-1-phenylallyl)-3-(trifluoromethyl)morpholin-2-one (4j).**

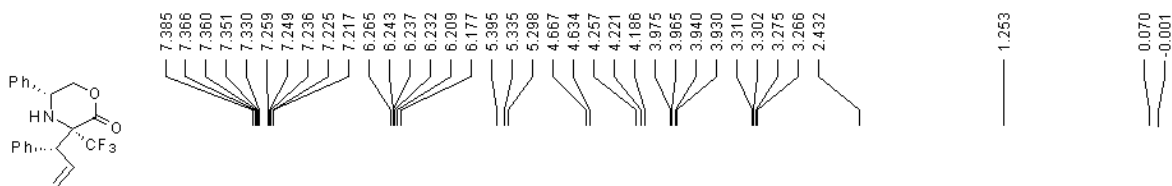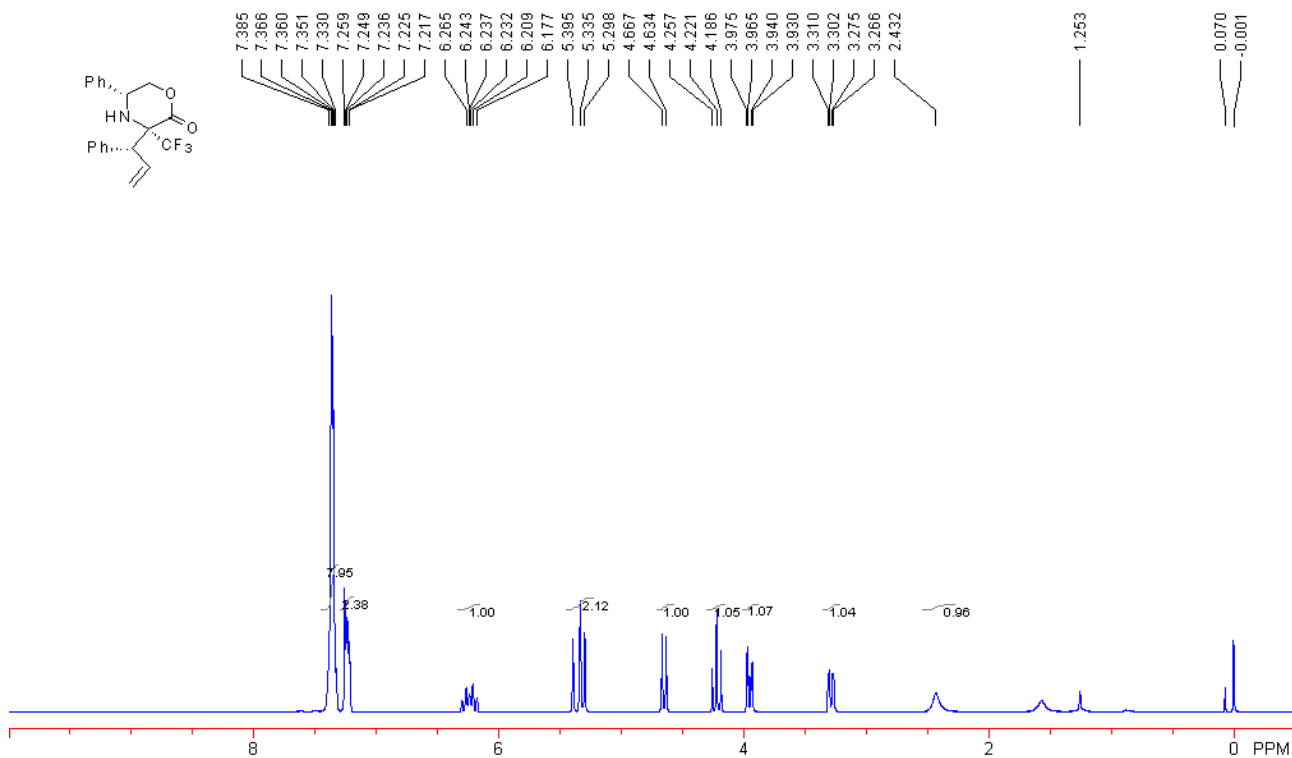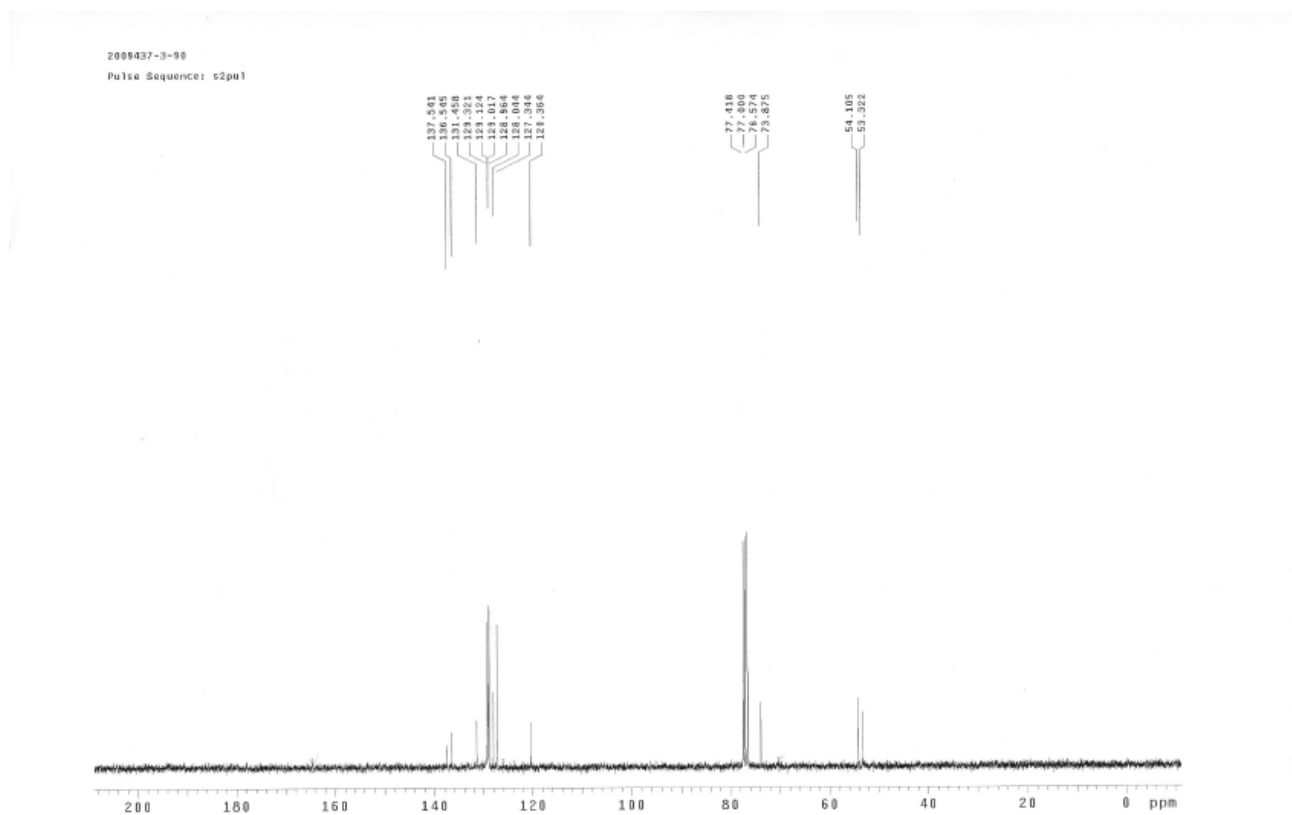

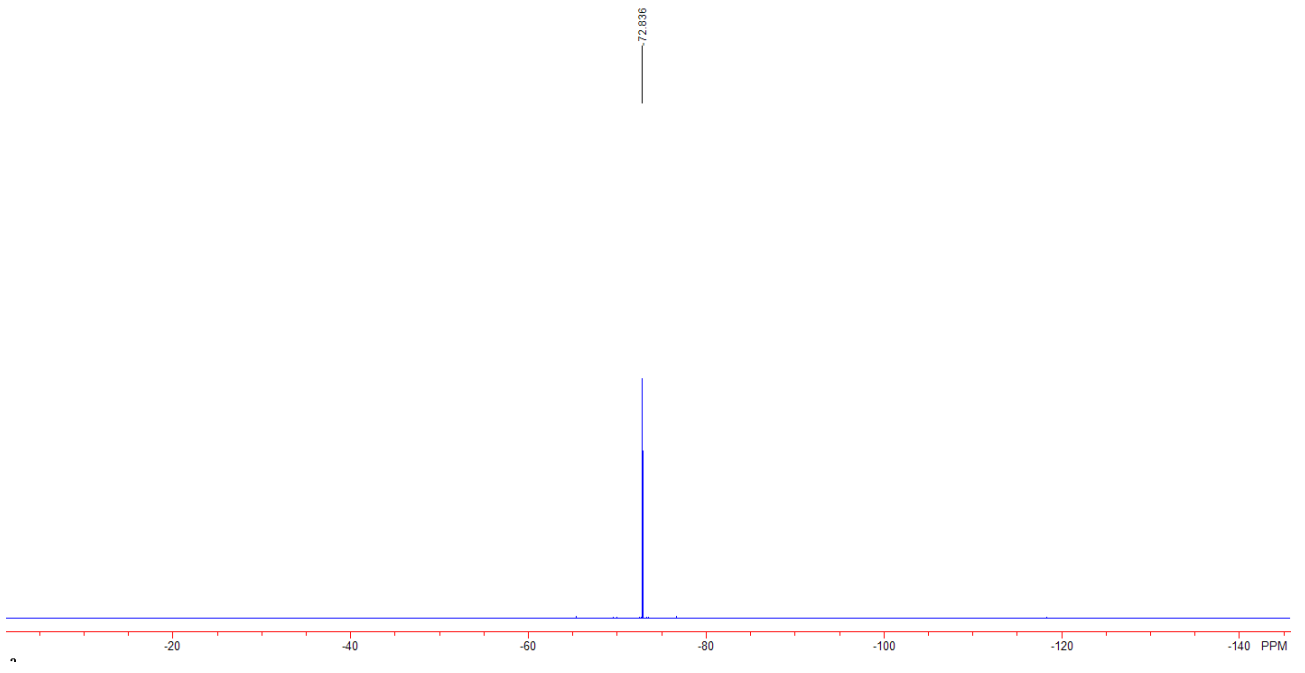

**(R)-2-(Trimethylsilyl)ethyl 2-amino-4-methyl-2-(trifluoromethyl)pentanoate (5).**

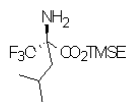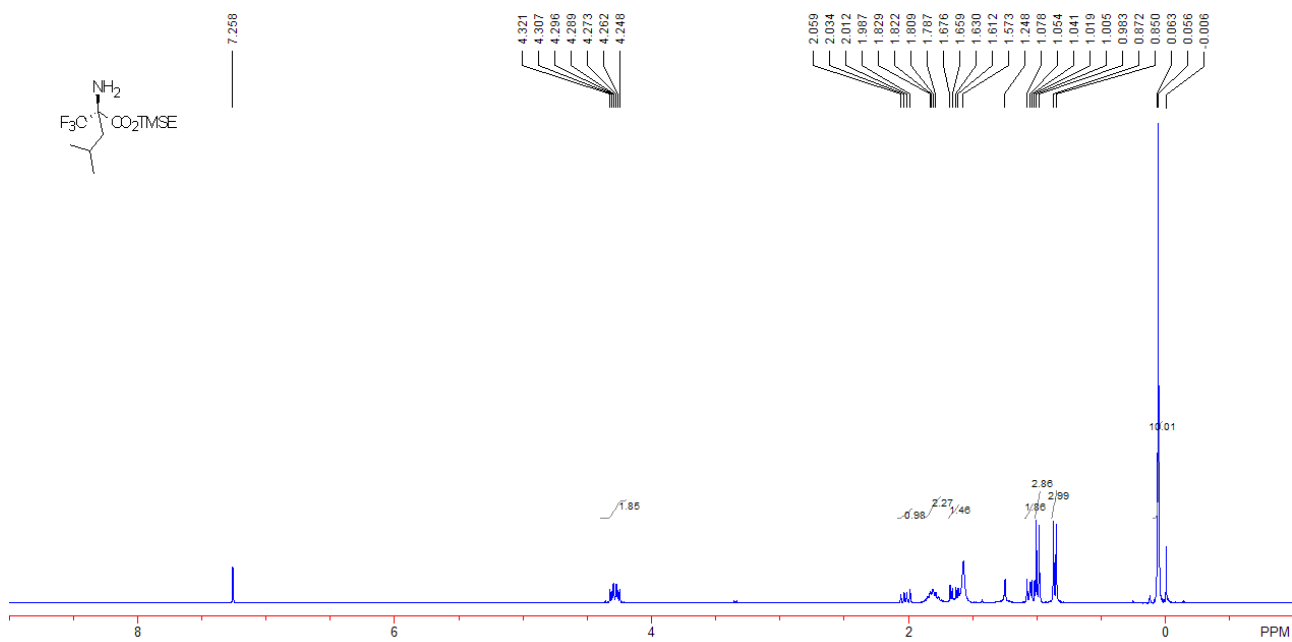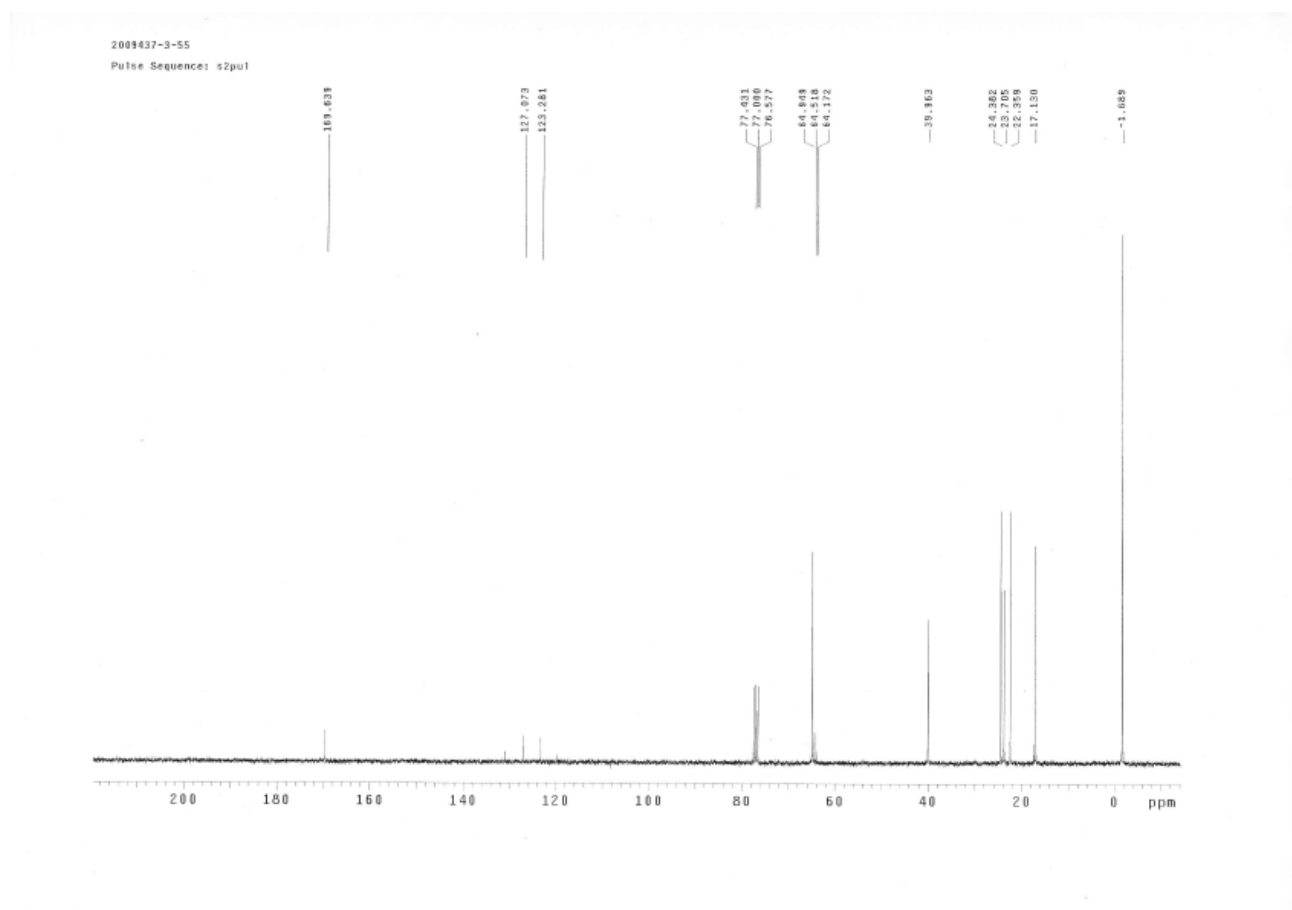

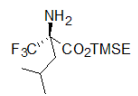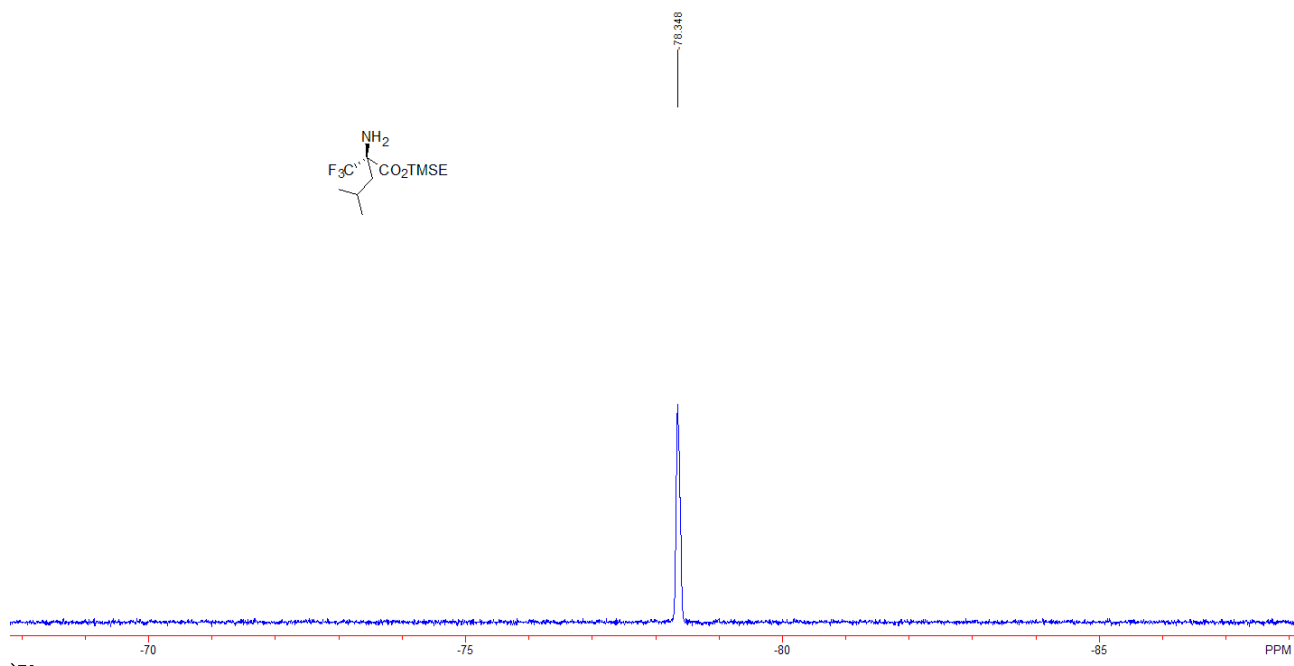

**(R)-2-((R)-2-methoxy-1-phenylethylamino)-2-(trifluoromethyl)pent-4-en-1-ol (6).**

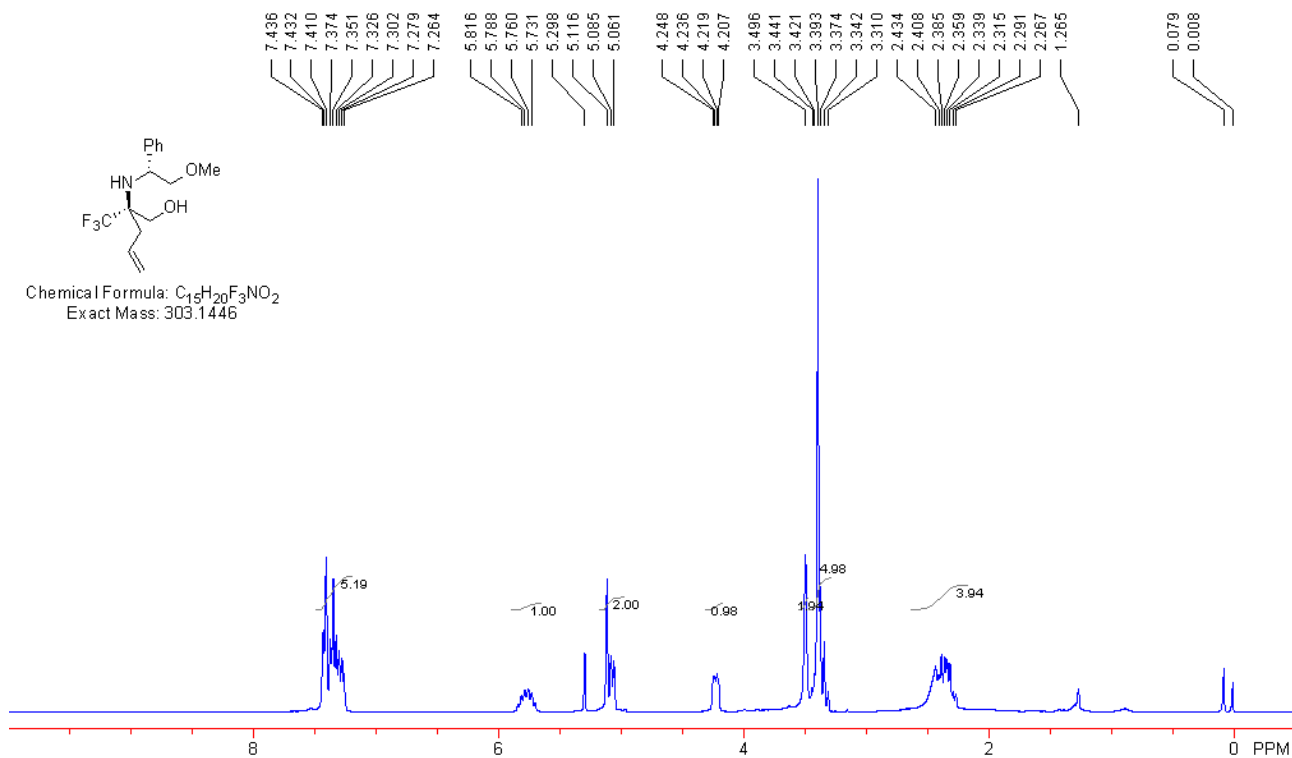

2008119-4-7MINQ

142.20  
131.57  
128.52  
127.70  
126.91  
125.63  
119.35  
77.69  
77.32  
77.00  
76.68  
63.52  
63.30  
63.07  
62.85  
61.13  
58.64  
55.73  
36.74

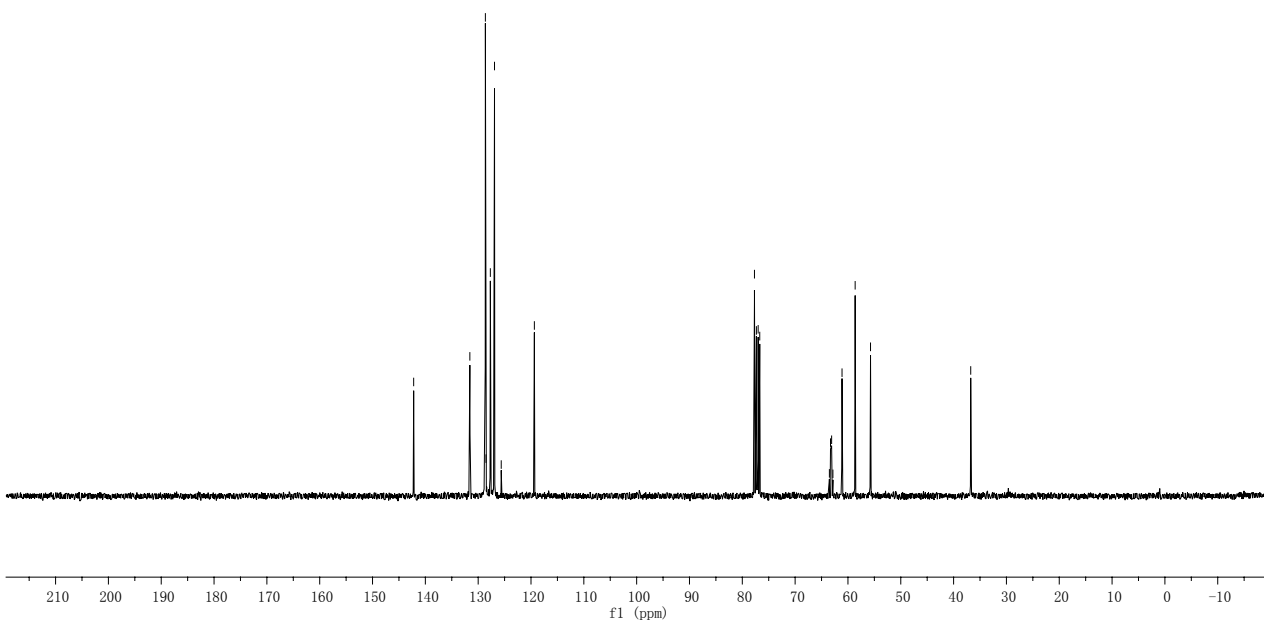



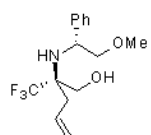

Chemical Formula: C<sub>16</sub>H<sub>20</sub>F<sub>3</sub>NO<sub>2</sub>  
Exact Mass: 303.1446

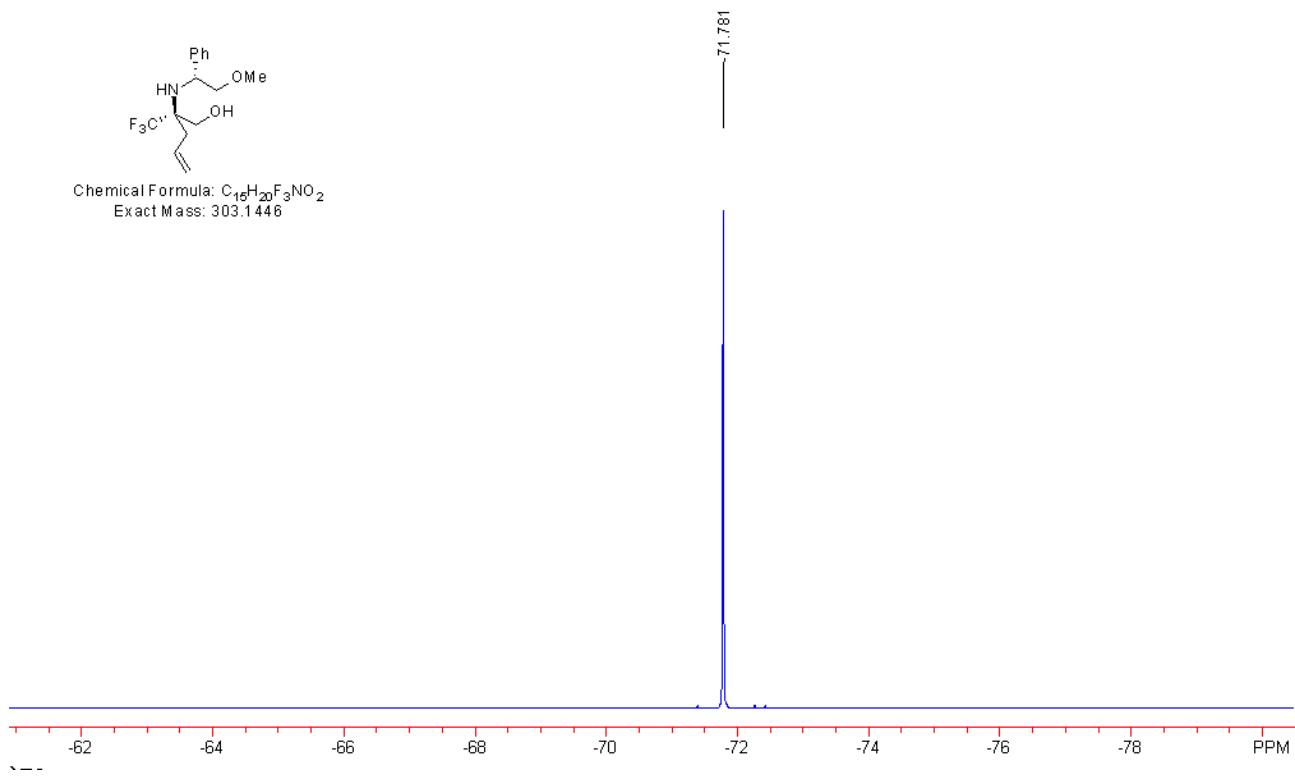

**(R)-2-allyl-1-((R)-2-methoxy-1-phenylethyl)-2-(trifluoromethyl)aziridine (7).**

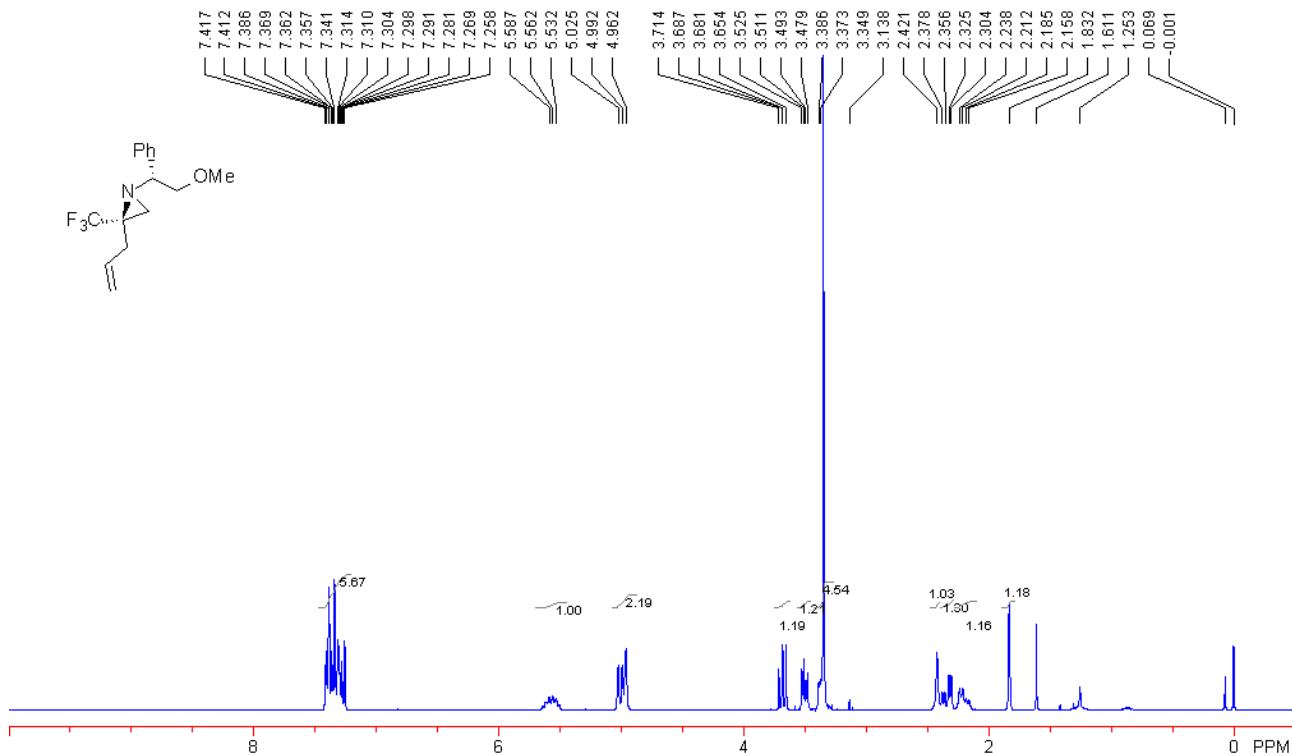

2006469-M-3-C  
2009469-M-3

139.67  
133.79  
128.36  
127.63  
127.25  
127.05  
125.36  
117.60  
78.88  
77.41  
76.99  
76.56  
66.06  
59.09  
35.05  
28.91

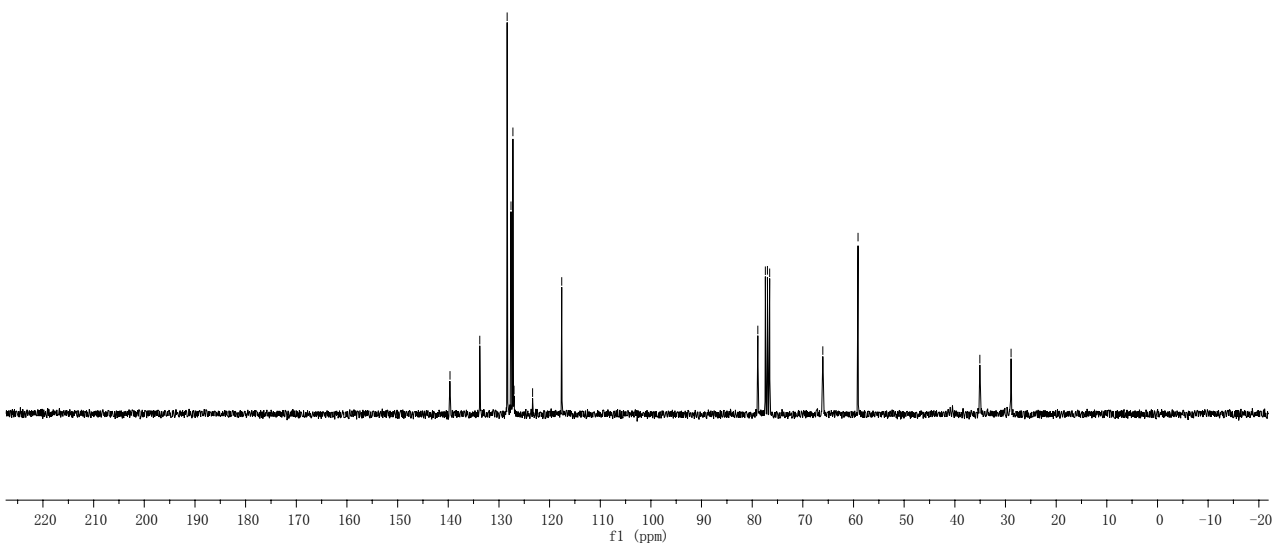

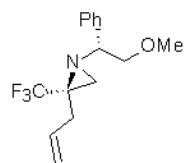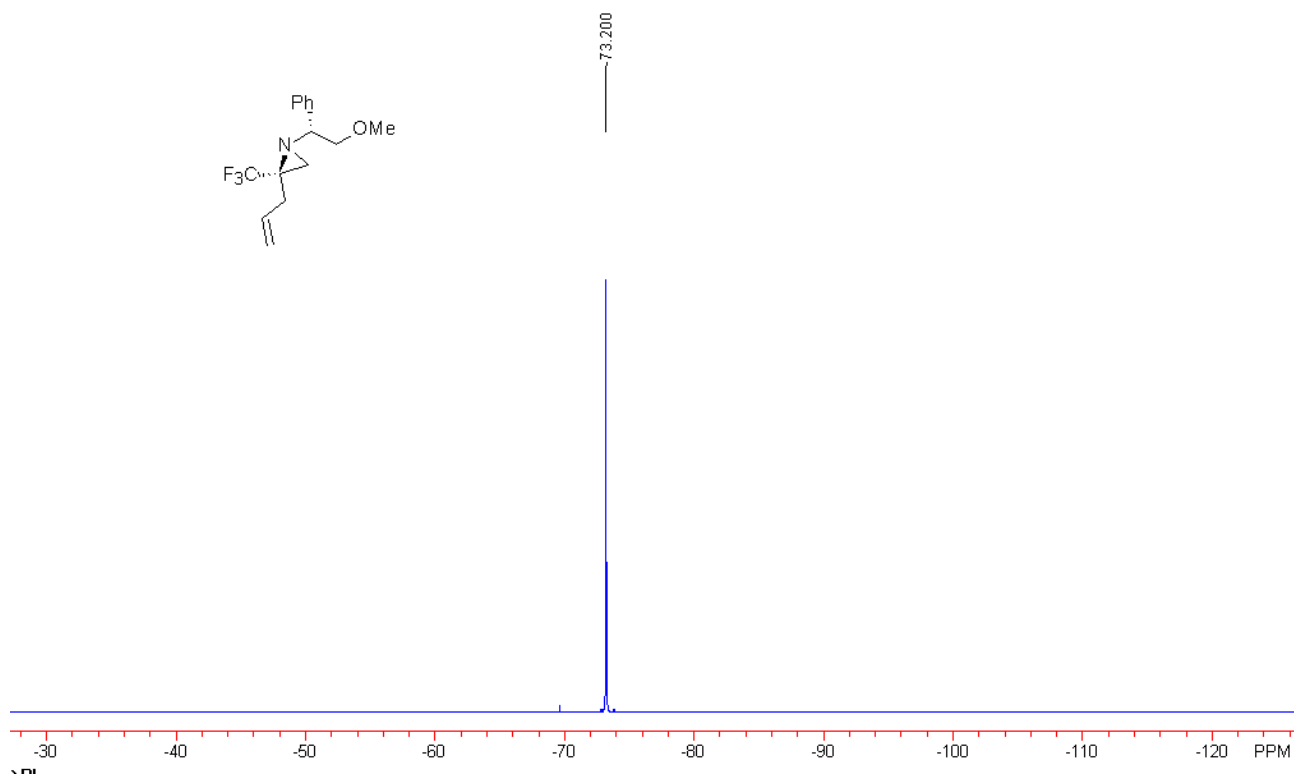

Supplement: c0cc02408b.pdf [file c0cc02408b.pdf]
